# Supplementary material for: Insight into the Phylogenetic Relationships among Three Subfamilies within Heptageniidae (Insecta: Ephemeroptera) along with Low-Temperature Selection Pressure Analyses Using Mitogenomes
Source: MDPI journal article supplement (doi:10.3390/insects12070656), 2021-07-19
Supplement: s1 [file s1]

|           |   |                                                                   |
|-----------|---|-------------------------------------------------------------------|
| NCR       | 1 | ATCCTTTTCTCCTCTTACTTCCTAAAAAGAGGAGAAAA                            |
| CR        | 1 | AGGTTTTTTTCTCCTAACCTCTAAGAAGGACCTATATA                            |
| consensus | 1 | *       *****   *   *   *   *       *****.***.***       .   *   * |

#### A. *A. furcate*

|           |   |                                                                   |
|-----------|---|-------------------------------------------------------------------|
| NCR       | 1 | ATCCTTTTCTCCTCTTACTTCCTAAAAAGAGGAGAAAA                            |
| CR        | 1 | AGGTTTTTTTCTCCTAACCTCTAAGAAGGACCTATATA                            |
| consensus | 1 | *       *****   *   *   *   *       *****.***.***       .   *   * |

#### B. *A. rubromaculata*

|           |   |                                                               |
|-----------|---|---------------------------------------------------------------|
| NCR       | 1 | ATCCTTTTCTCCTCTTACCTTCTAAAAAGAGGAGAAAA                        |
| CR        | 1 | AGGTTTTTTTCTCCTAACCTCTAAGAAGGATCAATATT                        |
| consensus | 1 | *       *****   *   *   *   *   *****.***.***       *   .   * |

#### C. *Afronurus* sp1. YW01BF06

|           |   |                                                                           |
|-----------|---|---------------------------------------------------------------------------|
| NCR       | 1 | ATCCTTTTCTCCTCTTACTTTCCTAAAAAGAGGAGAAAAT                                  |
| CR        | 1 | AGGTTTTTTTATCCTAATCTCTAAGAAGGATCAATATAT                                   |
| consensus | 1 | *       *****   *   *   *   *   *   *   *****.***.***       *   .   *   * |

#### D. *Afronurus* sp2. LS53BF04

|           |   |                                                                           |
|-----------|---|---------------------------------------------------------------------------|
| NCR       | 1 | ATCCTTTTCTCCTCTTGTCTTCTAAAAAGAGGAGAAAAG                                   |
| CR        | 1 | AGGTTTTTTTCTCCTAACCTCTAAGAAGGACCAATATAT                                   |
| consensus | 1 | *       *****   *   *   *   *   .   *   *****.***.***       *   .   *   * |

#### E. *A. yixingensis*

|           |   |                                                                               |
|-----------|---|-------------------------------------------------------------------------------|
| NCR       | 1 | ATCCTTTTTTCTCCTCTTGTCTTCTAAAAAGAGGAGAAAAAGA                                   |
| CR        | 1 | AGGTTTTTTTCTTCTTAACCTCTAAGAAGGATTAATATATATA                                   |
| consensus | 1 | *       *****   *   *   *   *   .   *   *****.***.***       *   .   *   *   * |

#### F. *Afronurus* sp. 07BF85

|           |   |                                                                       |
|-----------|---|-----------------------------------------------------------------------|
| NCR       | 1 | GTCCTTTTCTCCTCTTACTTCCTAAAAAGAGGAGAAAAA                               |
| CR        | 1 | AGGTTTTTTTACTCCTAACCTCTAAGAAGGATTAATATATA                             |
| consensus | 1 | .       *****   *   *   *   *       *****.***.***       *   .   *   * |

#### G. *Afronurus* sp. 07BF86

|           |   |                                                                       |
|-----------|---|-----------------------------------------------------------------------|
| NCR       | 1 | ATCCTTTTTTCTCCTTACCTCCTAAAAAGAGGAGAAAAA                               |
| CR        | 1 | AGGTTTTTTTCTTCTAACCTCTAAGAAGGATTAATATATA                              |
| consensus | 1 | *       *****   *   *   *   *   *****.***.***.***       .   *   *   * |

#### H. *Afronurus* sp. 07BF96

|           |   |                                              |
|-----------|---|----------------------------------------------|
| NCR       | 1 | TCCTCCTTACCCCTTACCTCTAAAAA-AAGGGGT           |
| CR        | 1 | TGTTCCATACCCCAAAATTCTTATCAATAAACAAAT         |
| consensus | 1 | *   ***   *****   *       **   **.*.*.   ..* |

#### I. *Epeorus* sp. JZ-2014

|           |   |                                                                    |
|-----------|---|--------------------------------------------------------------------|
| NCR       | 1 | ACCCT--TTCTCCTTTTAAAGGTTTAAAAAAGAGGAGAAAGCC                        |
| CR        | 1 | ACCCTGTTCTGCATTTAAGGTTTAAAGGTTTAAAGGTTTGTGTA                       |
| consensus | 1 | *****.   *   *   *   *   *   *   *   *   *   *   *   *   *   *   * |

#### J. *Epeorus* sp. MT-2014

NCR 1 AACTTTTCTTCTCTTTTGTAGCCCAAAAAAGAGGAAAGAAAA  
 CR 1 TATATGTATAAACCCAGTTATAACCTCAAAAAACCTTAAATAACA  
 consensus 1 \* \* \* \* \* \* \* . \* \* . \* \* \* \* \* \* \* \* \* \* \* \* \* \*

K. *E. herklotsi*

NCR 1 TCCTCCTTACCCCTTACCT-CTAAAAAAGGGT  
 CR 1 ACGTTATTATAACACACTTACTAGATAAAGACAT  
 consensus 1 \* \* \* \* \* \* \* . \* \* \* \* \* . \* \* \* \* \* . \*

L. *E. dayongensis*

NCR 1 ATTCTTTCTCCTTTGAAATCCCAAAAAGGAGAAAGAAATTA  
 CR 1 ATGATATTTCATTGGCTATTATTAAATAATATGATTGATTA  
 consensus 1 \*\* \* \* \* \* \* \* . \* \* \* \* \* \* \* \* \* \* . \* . \* . \* \* \* \*

M. *Epeorus* sp. LA03FY06

NCR 1 ATCCTTTTCTCCTCTTACTTCTGAAAAAGAGGAGAAAAAG  
 CR 1 AAGCATTTCTCCTCT-GCTTCTTCCAAAAGAGGAGGA----  
 consensus 1 \* \* \* \* \* \* \* . \* \* \* \* \* \* \* \* \* \* \* \* \* . \* . . . .

N. *Epeorus* sp. XL-2019

NCR 1 ATCCTTTTCTCCTCTTACTCCTGAAAAAGAGGAGAAAAAG  
 CR 1 AGCATTTCTCCTCTGTCTCTCCAAA-GAGGAGGA----  
 consensus 1 \* \* \* \* \* \* \* \* \* \* \* \* \* \* \* \* \* . \* \* \* \* \* . \* . . .

O. *Heptageniidae* sp. YW03BF02

NCR 1 TTCTTTTCTCCTCTTGTCTCCTAAAAAAGAGGAGAAA  
 CR 1 TTCATTTCTCCTCTTGTCTCCTAAAAA-GAGGAGAAA  
 consensus 1 \*\*\* \* \* \* \* \* \* \* \* \* \* \* \* \* \* \* \* . \* \* \* \* \* \*

P. *L. Aphrodite*

NCR 1 CTTCTTTCCACTCCTTCAAAGGAAAG  
 CR 1 CCTCTTTCTAATTCTGGAGATAATA  
 consensus 1 \* \* \* \* \* \* \* \* \* \* . \* . . \* \* \*

Q. *M. mediopunctatum*

NCR 1 CTTCTTTCCACCCTTTCAAAGGAAAG  
 CR 1 TACGTTTCTACCCATCTAATAAAAAAG  
 consensus 1 \* \* \* \* \* \* \* \* \* \* \* \* \* . \* \* \* \* \*

R. *M. modestum*

NCR 1 CTTCTTTCCATCCTTAAAAGGAAAG  
 CR 1 CCTCTTTCAAATCTCCGGAGATAAT  
 consensus 1 \* \* \* \* \* \* \* \* \* \* . \* \* . \* \*

S. *M. vicarium*

NCR 1 ACCTTTTCTTCTCTTGTCTTCTTAAAAAGAGGAAGAAAA  
 CR 1 AAGCATTTTCCCTCTTGTCTTCTTAAAAAGAGGGGAA----  
 consensus 1 \* \* \* \* \* \* \* \* \* \* \* \* \* \* \* \* \* . \* . . . .

T. *P. youi*

NCR

CR

consensus

1

1

1

ATTTCCTT--TCTTCTACTCTTAAAAAGAAAGAAATT

ATTCCCTTCTTCTTCCAGAAATAAAAGGAAGAAGA--

\*\*\* \*\*\*.\*\*\*\*\* \*

\*\*\*\*\*.\*\*\*\*\*..\*.\*..

U. P. cupulatus

NCR

CR

consensus

1

1

1

AACCTTTTCTCCTCTTGTCTTCTAAAAAAGAGGAGAAAA

AGGTTTTTTTCTCTTAACCTCTAAGAAGGATCAATATTT

\*.\*\*\*\*\* \* \*\*\*\*\*. \* \*\*\*\*\*.\*\*\*... \* \*

V. Parafronurus sp. XL-2019

NCR

CR

consensus

1

1

1

CTTCTTTCCCTGGGGGAAAGGAAAG

ATCCTTTACCGAGGGGGTCATCAAAT

\* \*\*\*\*\* \*\* .\*\*\*\*\* \* \*\*\*

W. S. interpunctatum

NCR

CR

consensus

1

1

1

CTTCTTTCCA-TCCCTGTAAAGCAAAG

CCTCTTTCAAATCTCCGGAGATAATAG

\* \*\*\*\*\* \*.\*\* \* \* \*. \* . \* \*\*

X. S. femoratum
