# Supplementary material for: Insight into the Phylogenetic Relationships among Three Subfamilies within Heptageniidae (Insecta: Ephemeroptera) along with Low-Temperature Selection Pressure Analyses Using Mitogenomes
Source: MDPI journal article supplement (doi:10.3390/insects12070656), 2021-07-19
Supplement: s1 [file s1]

|                                 |   |                  |
|---------------------------------|---|------------------|
| <i>Afronurus</i> sp. 07BF85     | 1 | TACTTAAAAAGTTCAG |
| <i>Afronurus</i> sp. 07BF86     | 1 | TACTTAAAAAGTTCAG |
| <i>P. youi</i>                  | 1 | TACTTAAAAAGTTCAA |
| <i>Epeorus</i> sp. XL-2019      | 1 | TACTTAAAAAGTTCAA |
| <i>Epeorus</i> sp. MT-2014      | 1 | TACTTAAAAAGTTCAA |
| <i>Epeorus</i> sp. JZ-2014      | 1 | TACTTAAAAAGTTCAA |
| <i>E. herklotsi</i>             | 1 | TACTTAAAAAGTTCAA |
| <i>S. femoratum</i>             | 1 | TACTTAAAAAGTTCAA |
| <i>S. interpunctatum</i>        | 1 | TACTTAAAAAGTTCAA |
| <i>M. vicarium</i>              | 1 | TACTTAAAAAGTTCAA |
| <i>M. modestum</i>              | 1 | TACTTAAAAAGTTCAA |
| <i>M. mediopunctatum</i>        | 1 | TACTTAAAAAGTTCAA |
| <i>Epeorus</i> sp. LA03FY06     | 1 | TACTTAAAAAGTTCAA |
| <i>E. dayongensis</i>           | 1 | TACTTAAAAAGTTCAA |
| <i>A. yixingensis</i>           | 1 | TACTTAAAAAGTTCAA |
| <i>A. rubromaculata</i>         | 1 | TACTTAAAAAGTTCAA |
| <i>Afronurus</i> sp. 07BF96     | 1 | TACTTAAAAAGTTCAA |
| <i>P. cupulatus</i>             | 1 | TACTTAAAAAGTTCAA |
| <i>Afronurus</i> sp2. LS53BF04  | 1 | TACTTAAAAAATTCAA |
| <i>Afronurus</i> sp1. YW01BF06  | 1 | TACTTAAAAAATTCAA |
| <i>L. aphrodite</i>             | 1 | TACTTAAAAAATTCAA |
| Heptageniidae sp. YW03BF02      | 1 | TACTTAAAAAATTCAA |
| <i>A. furcata</i>               | 1 | TACTTAAAAAATTCAA |
| <i>Parafronurus</i> sp. XL-2019 | 1 | TACTTAAAAAATTCAA |
| consensus                       | 1 | *****. .***.     |

NCR located between *trnS2* and *ND1*
