# Supplementary material for: Insight into the Phylogenetic Relationships among Three Subfamilies within Heptageniidae (Insecta: Ephemeroptera) along with Low-Temperature Selection Pressure Analyses Using Mitogenomes
Source: MDPI journal article supplement (doi:10.3390/insects12070656), 2021-07-19
Supplement: s1 [file s1]

**Table S6.** Positive selection analysis of mitochondrial protein-coding genes based on the branch model.

| Tree | Model      | Ln L           | Estimates of parameters               | Model compared        | 2ΔL      | LRT P-value |
|------|------------|----------------|---------------------------------------|-----------------------|----------|-------------|
| ML   | Two- ratio | -123656.793918 | $\omega_0=0.02021$ $\omega_1=0.00010$ | Model 0 vs. Two ratio | 176.3226 | 0.0000      |
|      | Model 0    | -123744.955230 | $\omega=0.02123$                      | Model 2               |          |             |
