# Supplementary material for: Insight into the Phylogenetic Relationships among Three Subfamilies within Heptageniidae (Insecta: Ephemeroptera) along with Low-Temperature Selection Pressure Analyses Using Mitogenomes
Source: MDPI journal article supplement (doi:10.3390/insects12070656), 2021-07-19
Supplement: s1 [file s1]

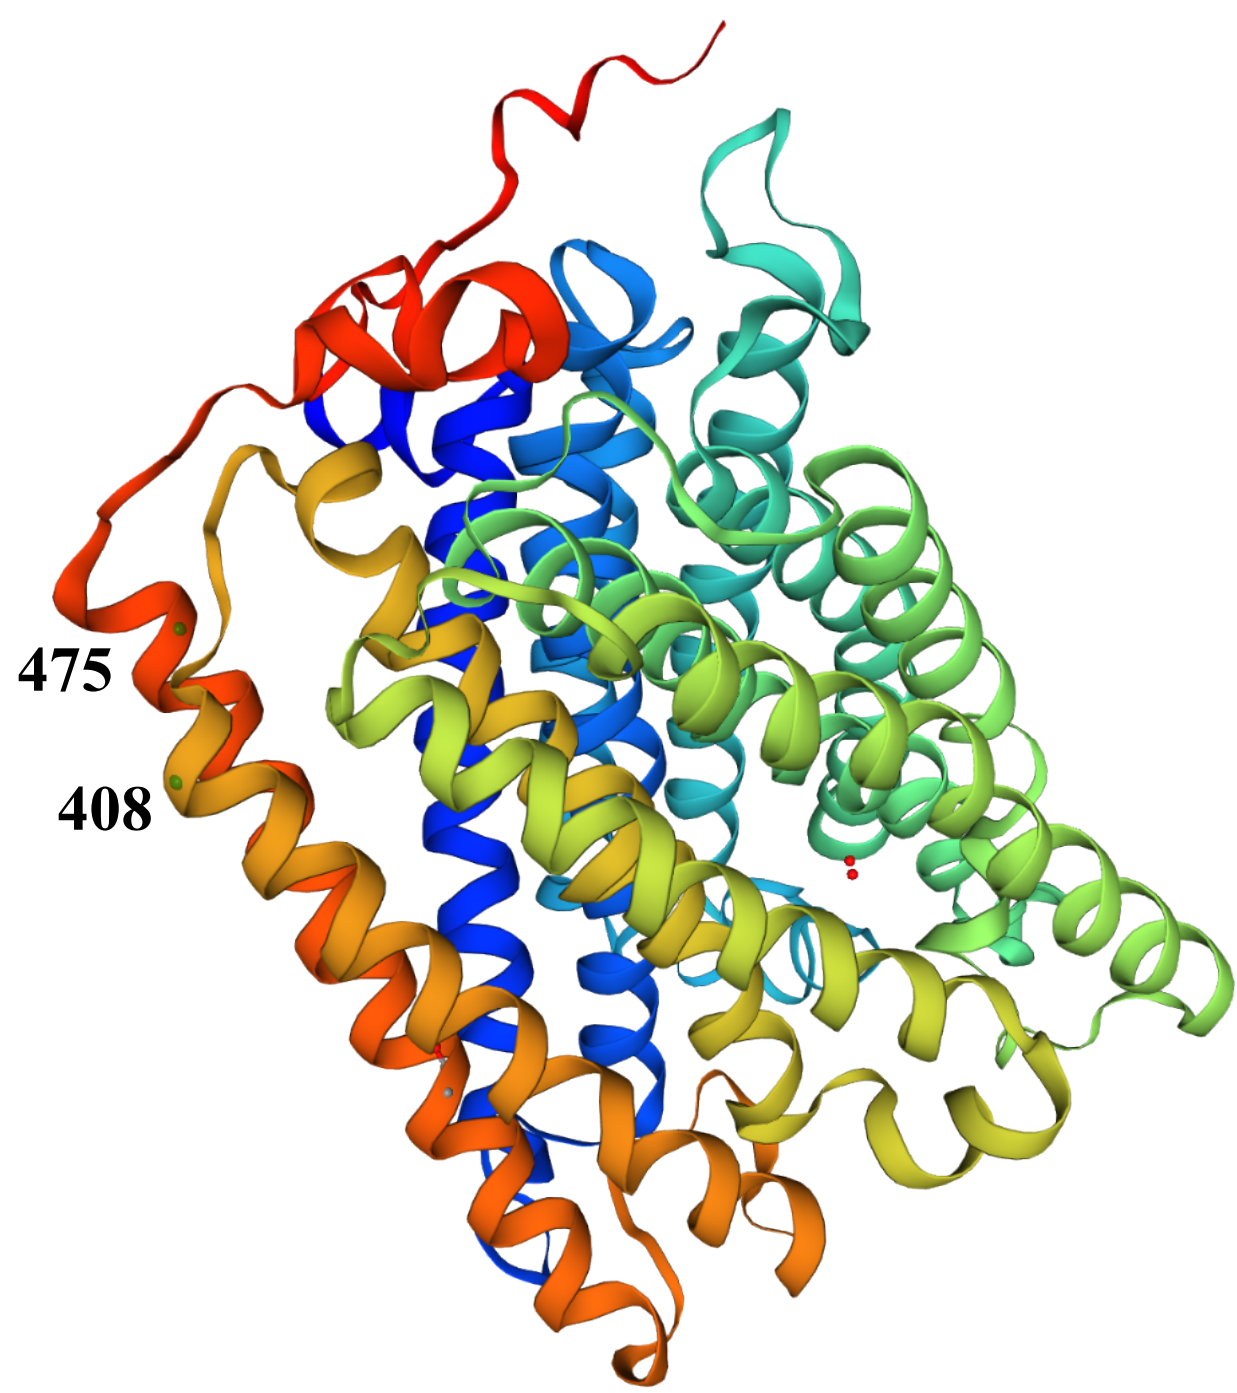

**A. *COX1***

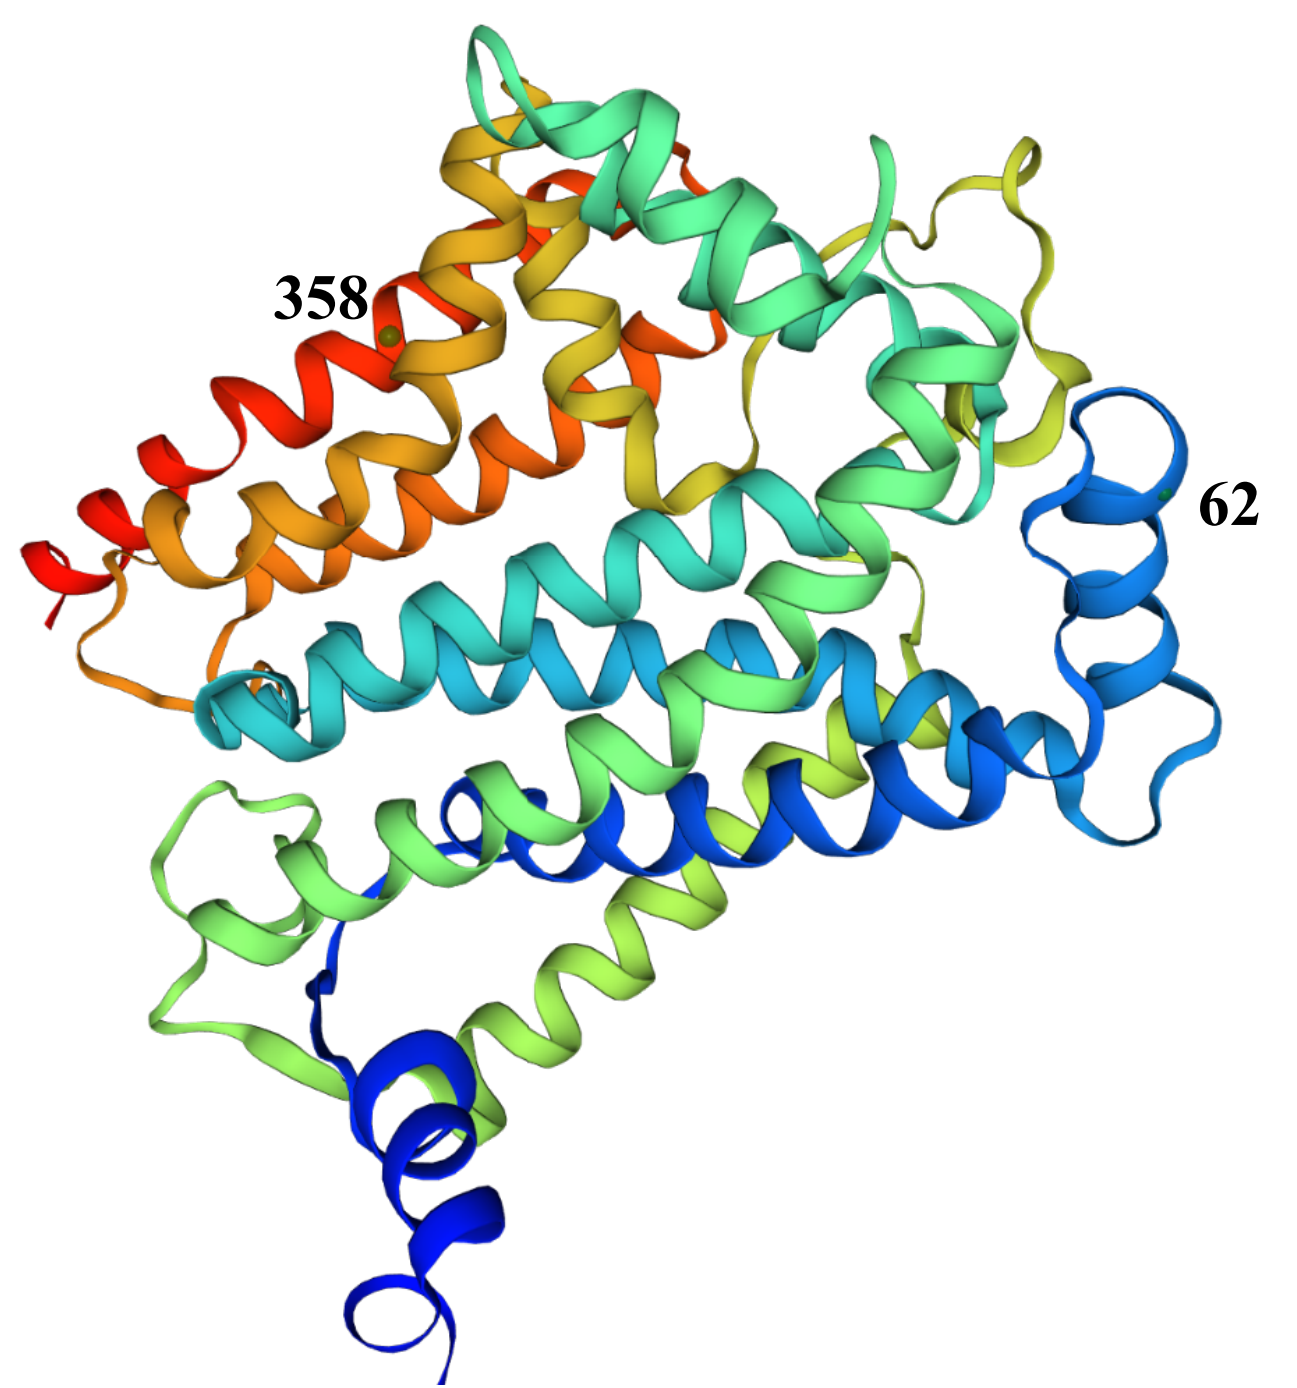

**B. *Cyt b***

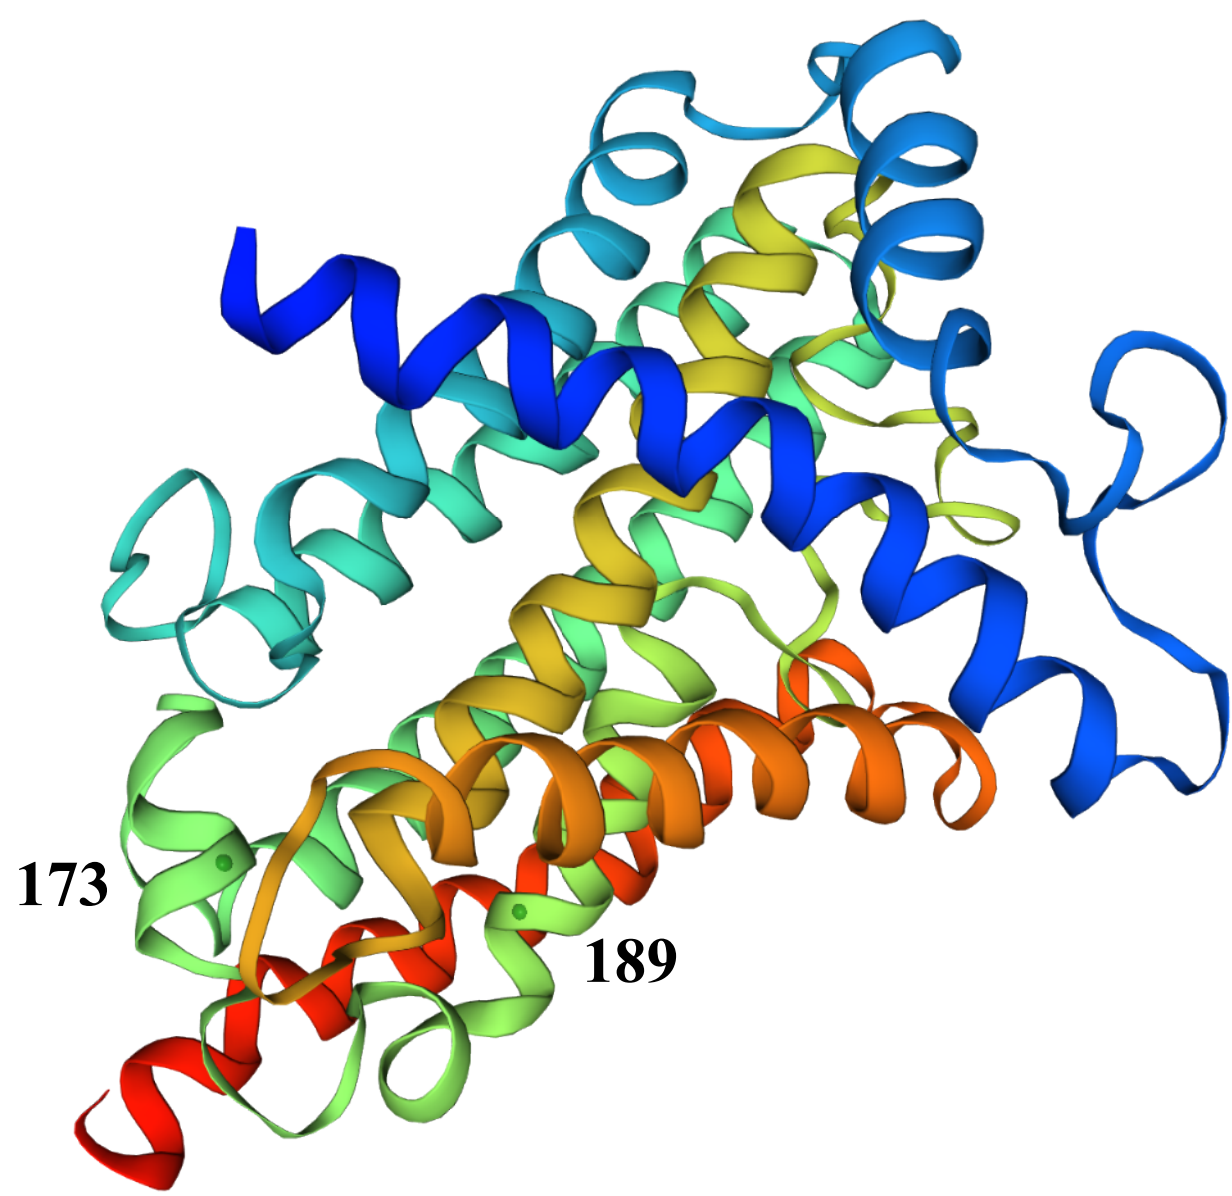

**C. *ND1***

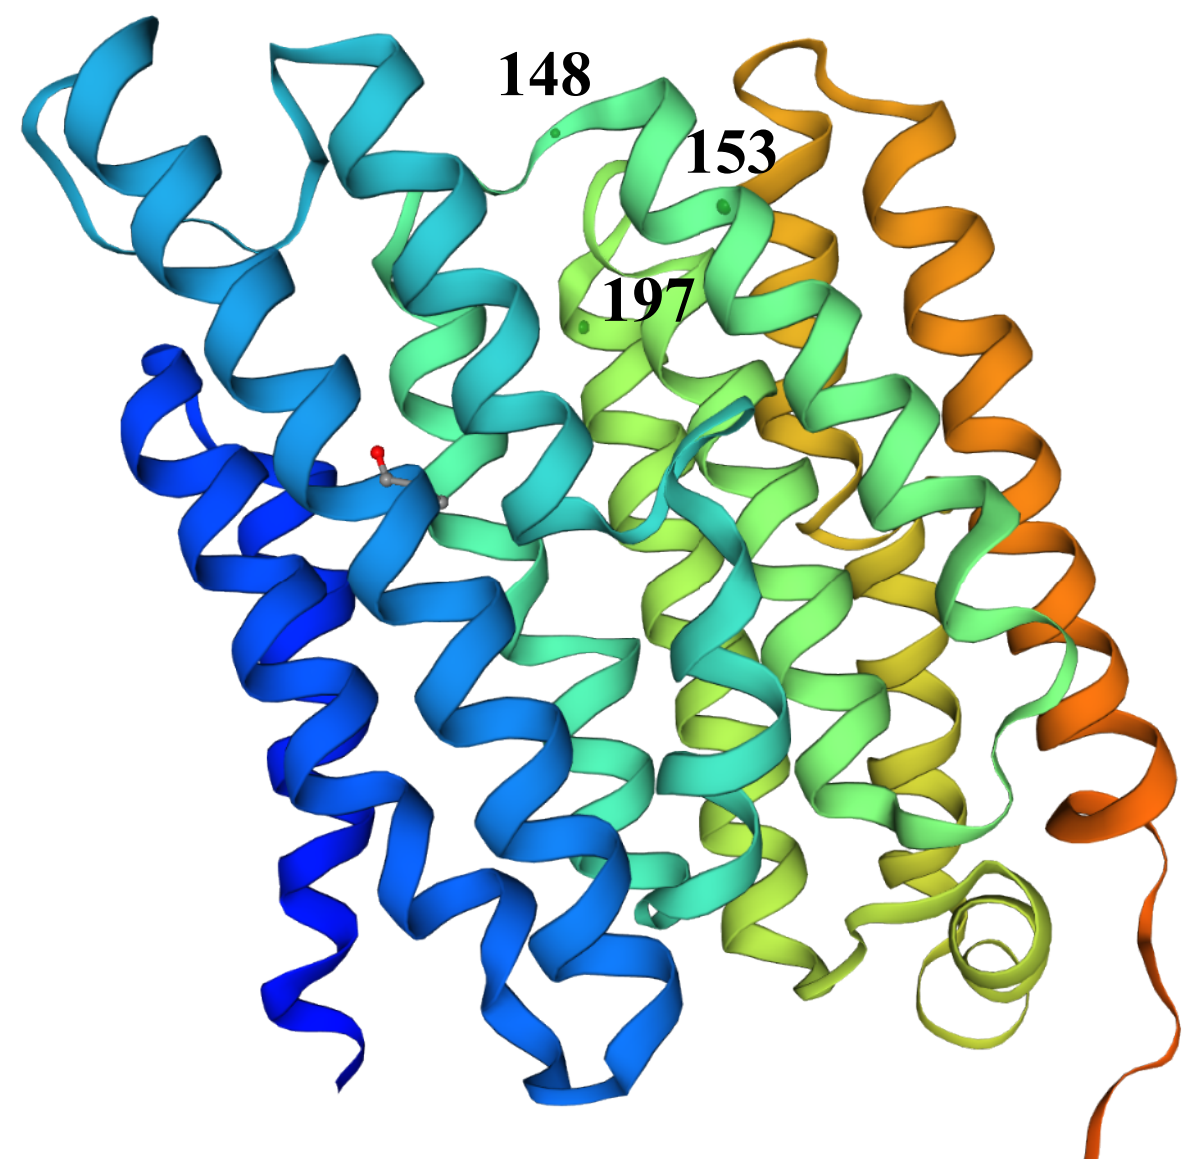

**D. *ND2***

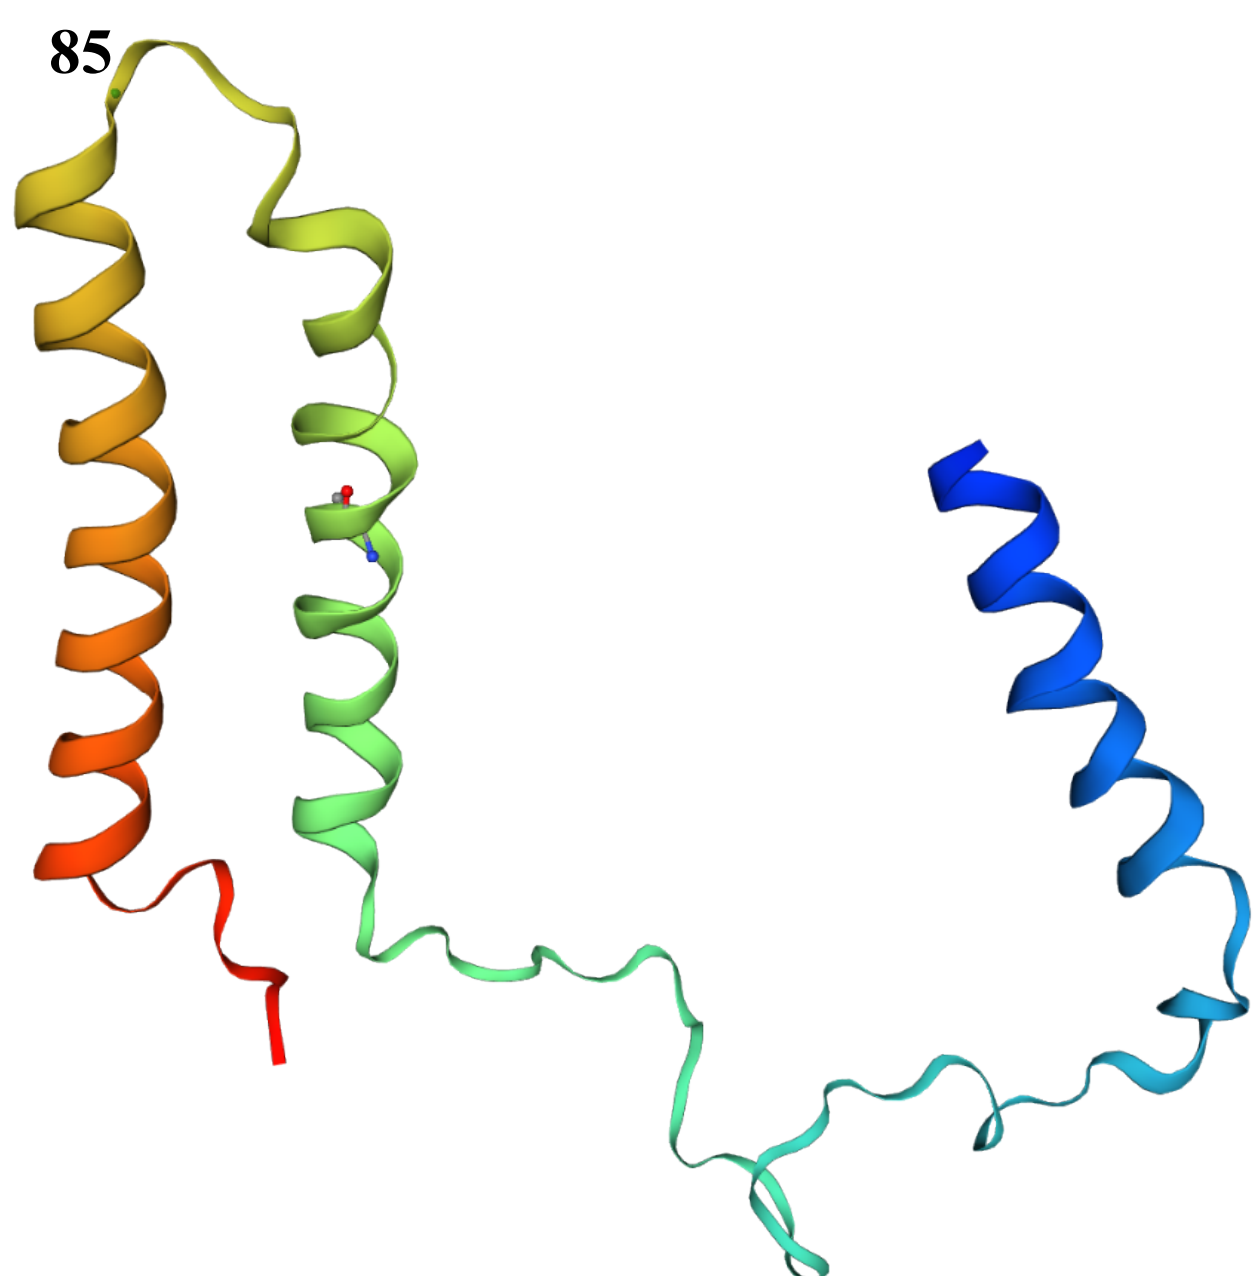

**E. *ND3***

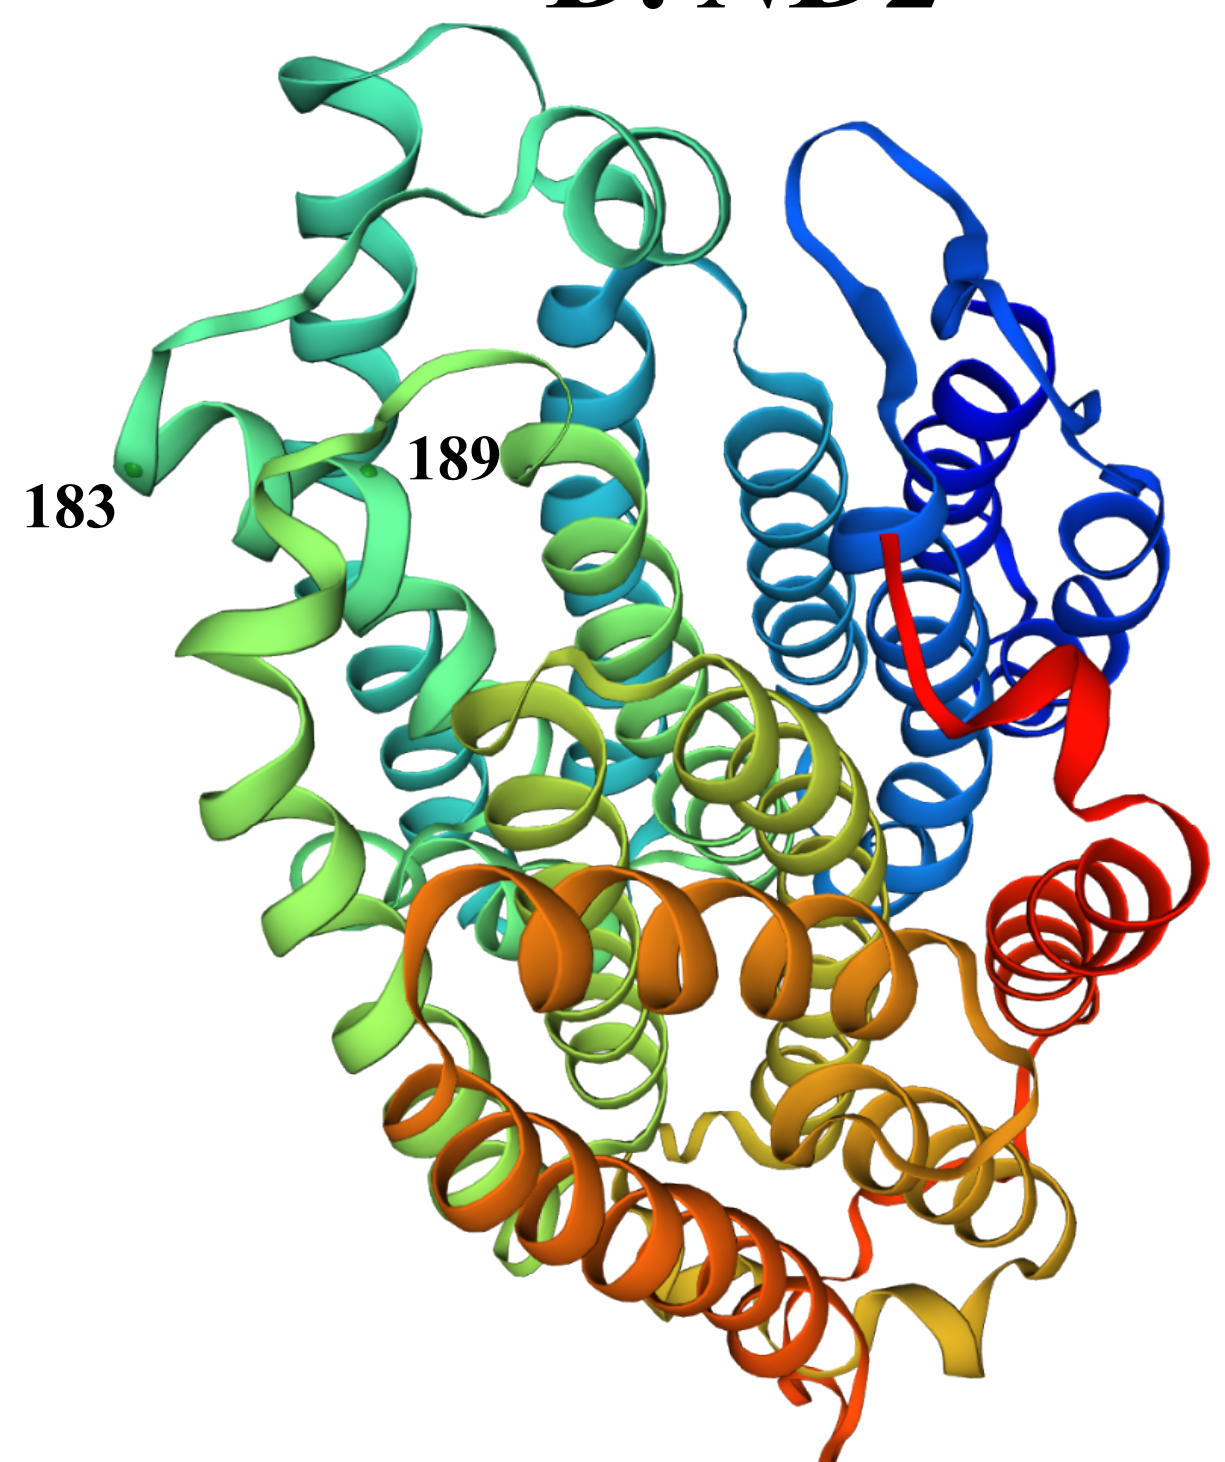

**F. *ND4***

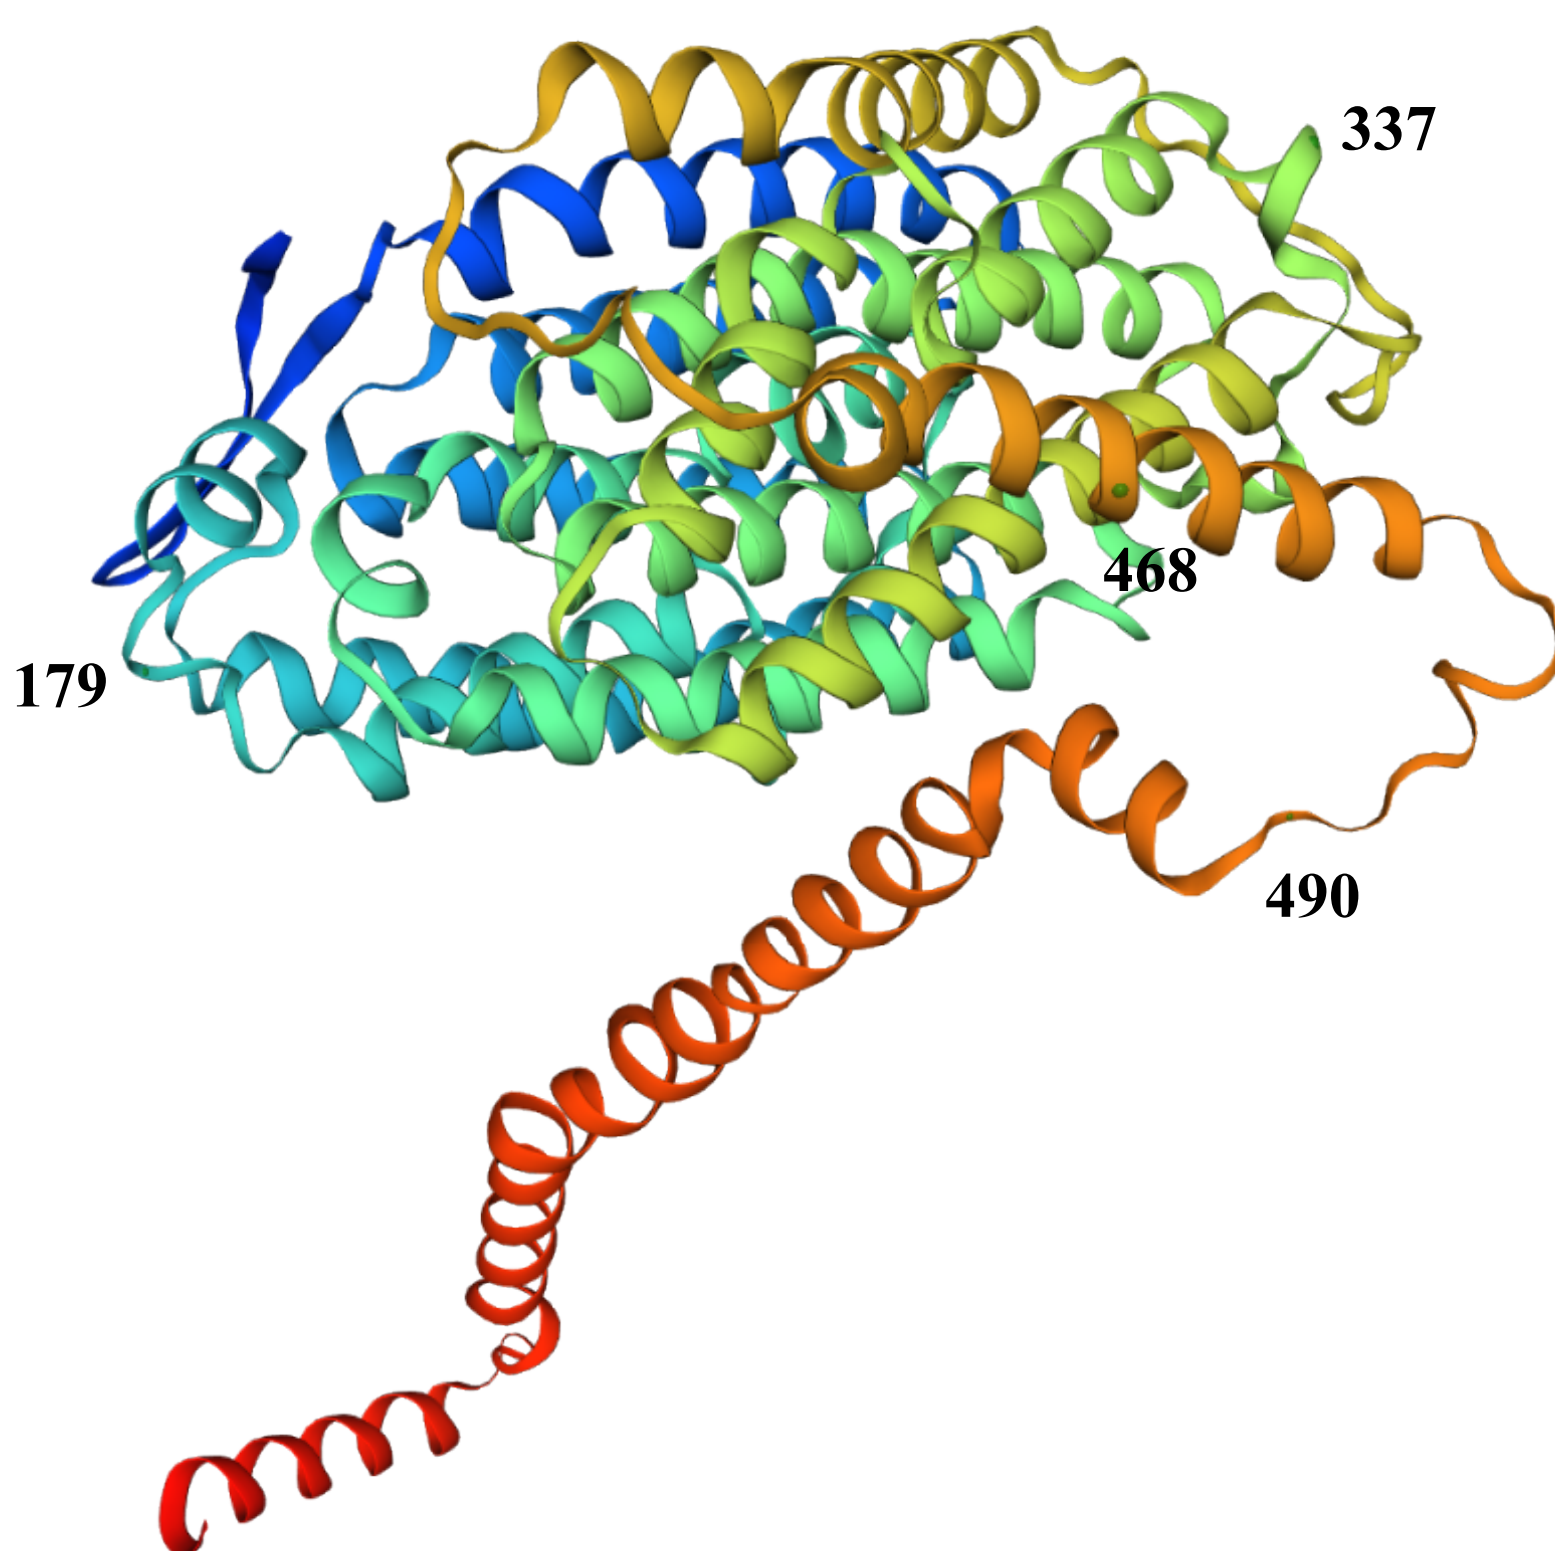

**G. *ND5***

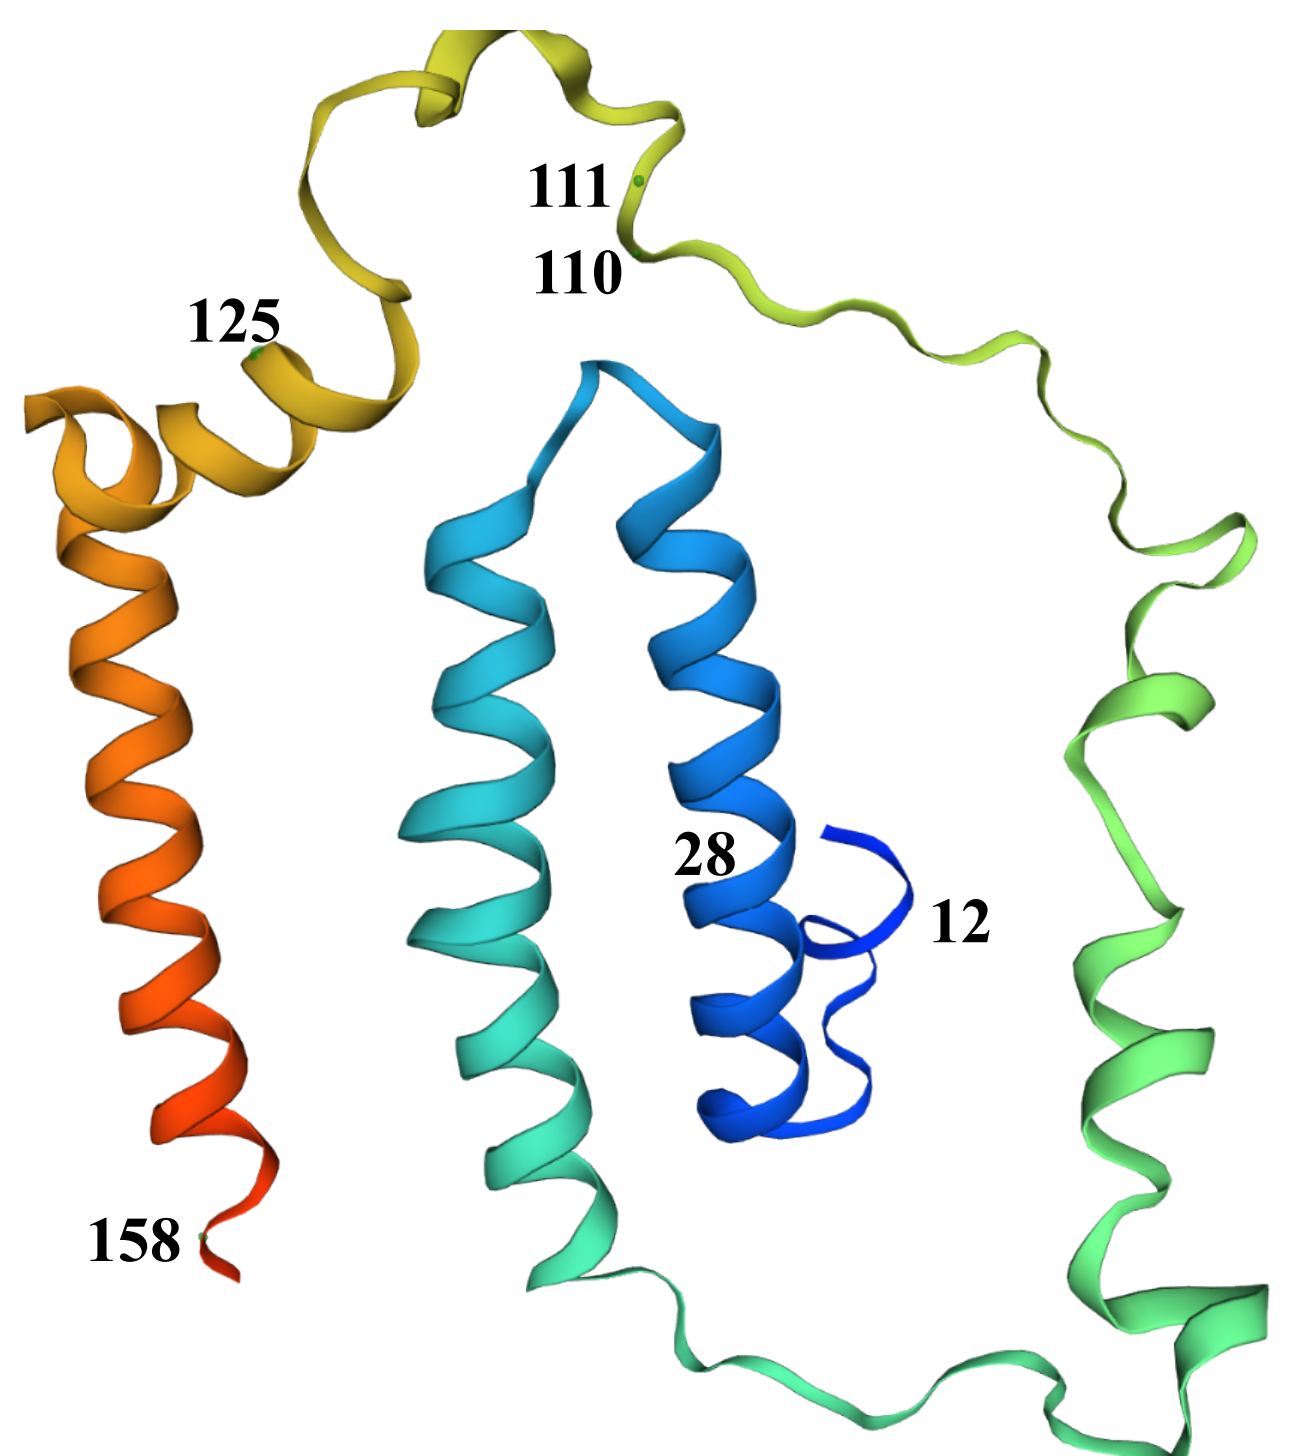

**H. *ND6***

Note. The 318 and 341 amino acid sites at *ND2*, the 25 and 29 amino acid sites at *ND5*, along with the 3 amino acid site at *ND6* were not predicted due to the lack of corresponding template sequences.
