# Supplementary material for: Insight into the Phylogenetic Relationships among Three Subfamilies within Heptageniidae (Insecta: Ephemeroptera) along with Low-Temperature Selection Pressure Analyses Using Mitogenomes
Source: MDPI journal article supplement (doi:10.3390/insects12070656), 2021-07-19
Supplement: s1 [file s1]

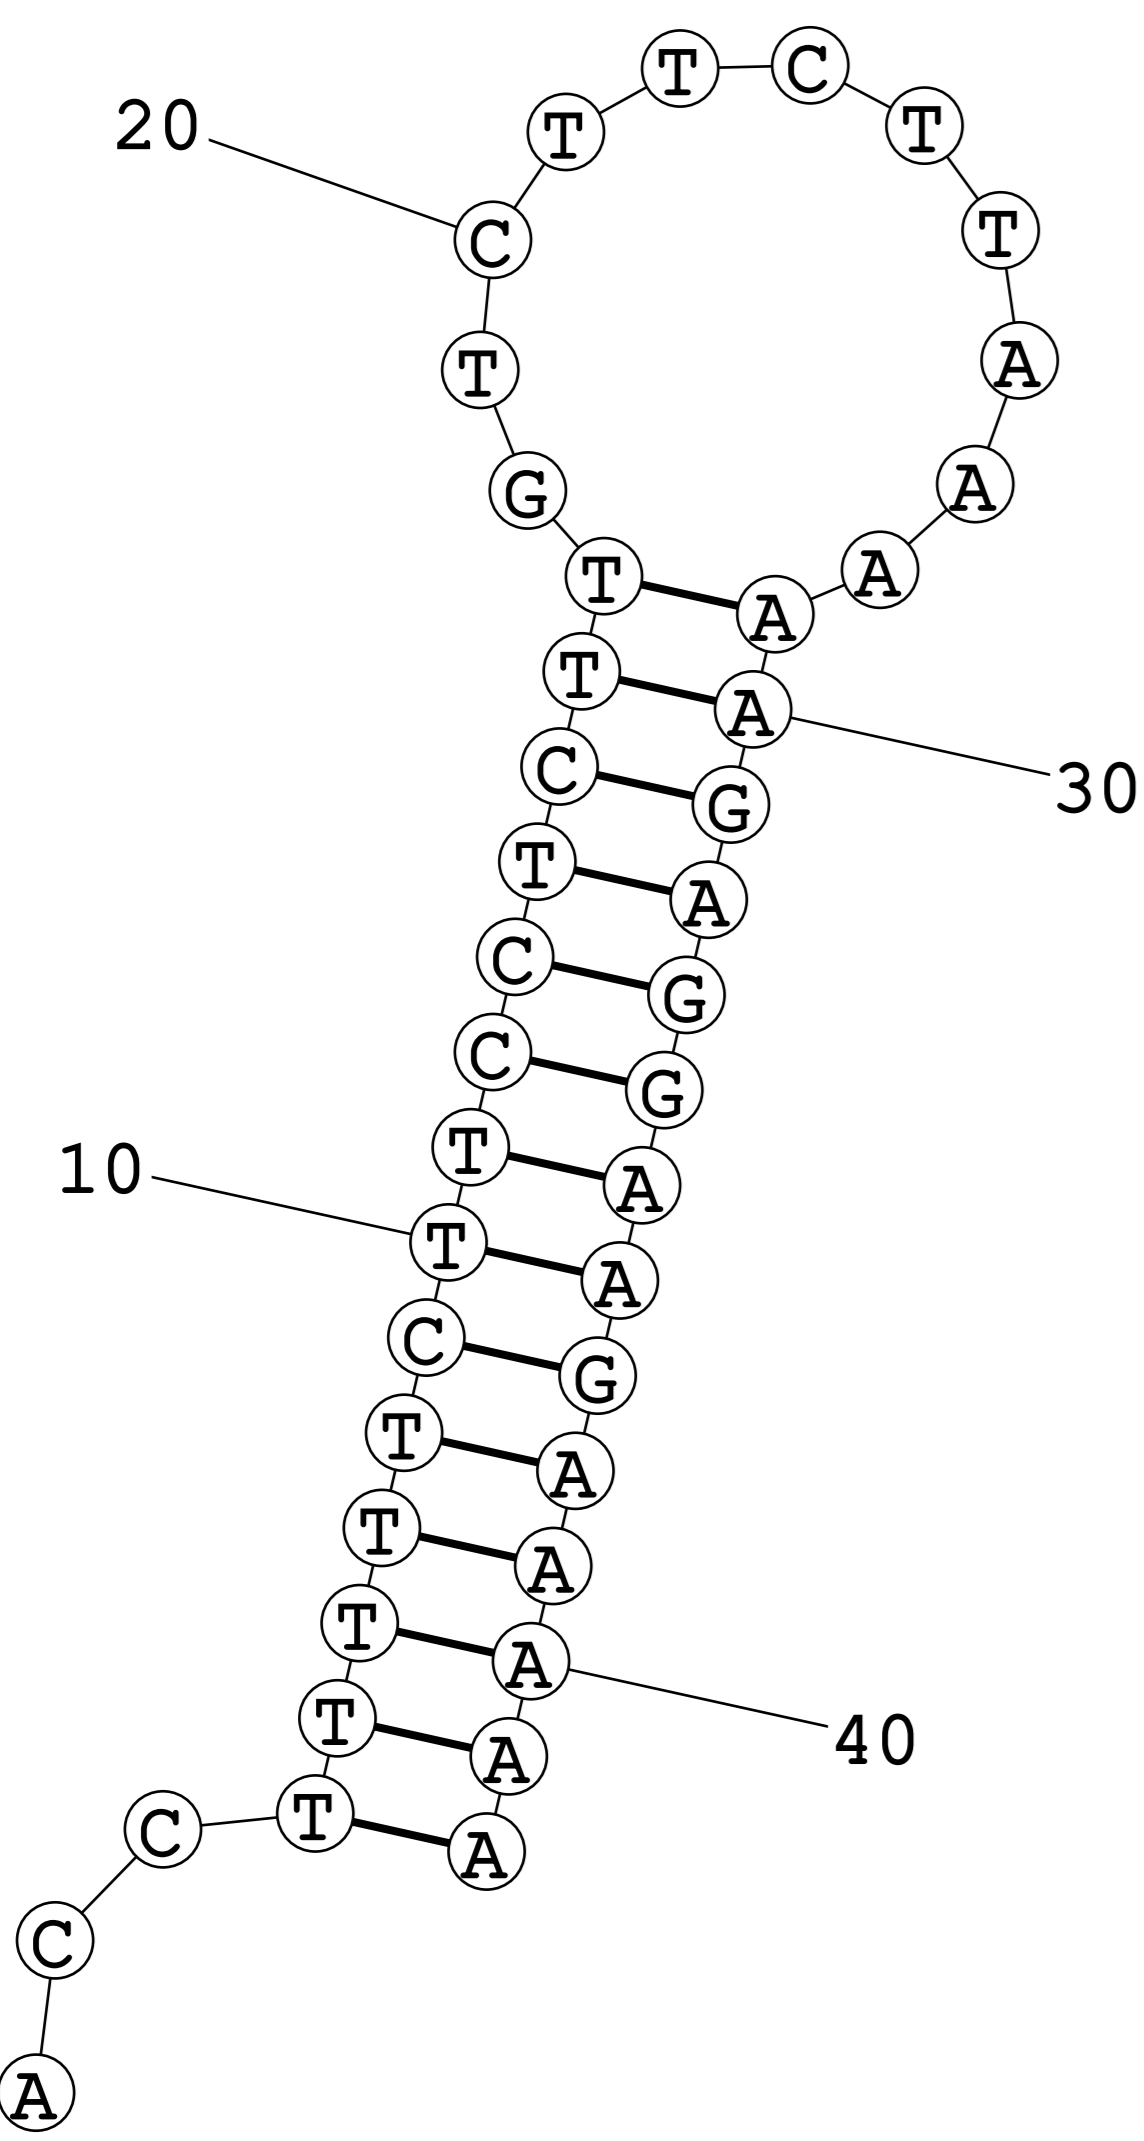

**A. *P. youi***

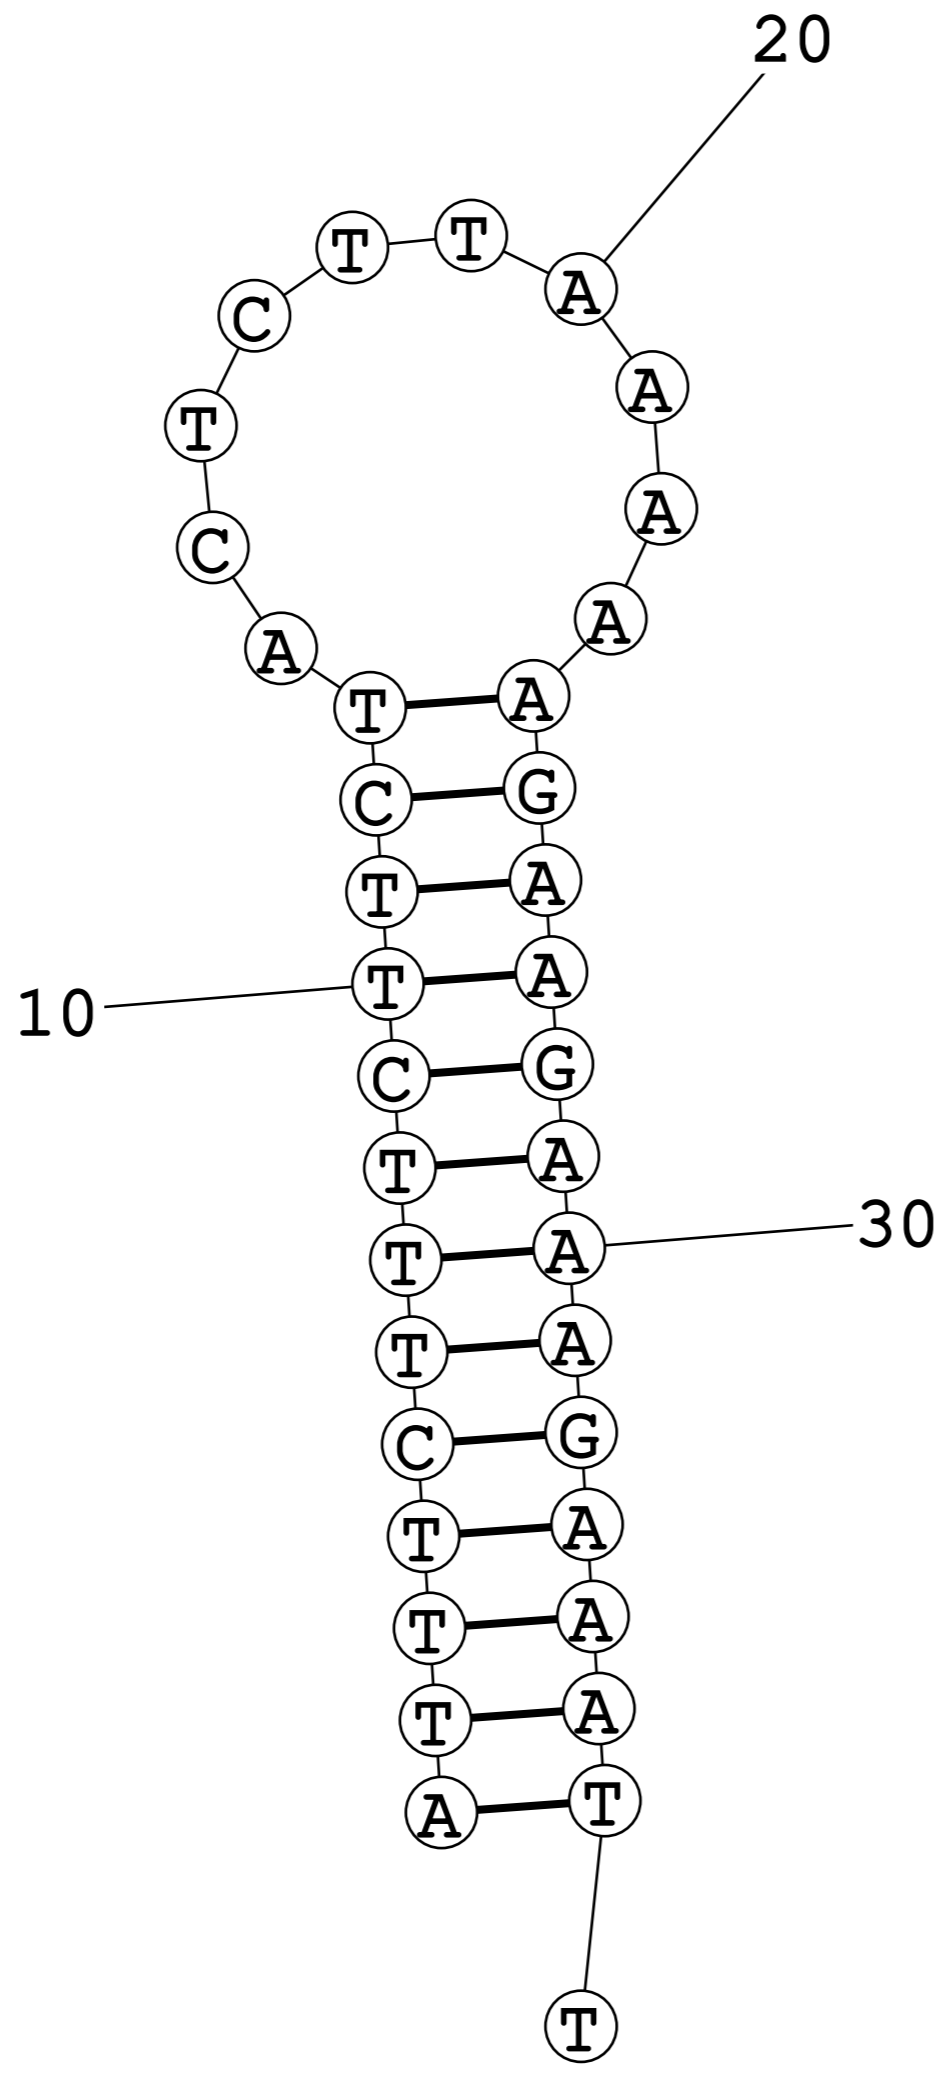

**B. *P. cupulatus***

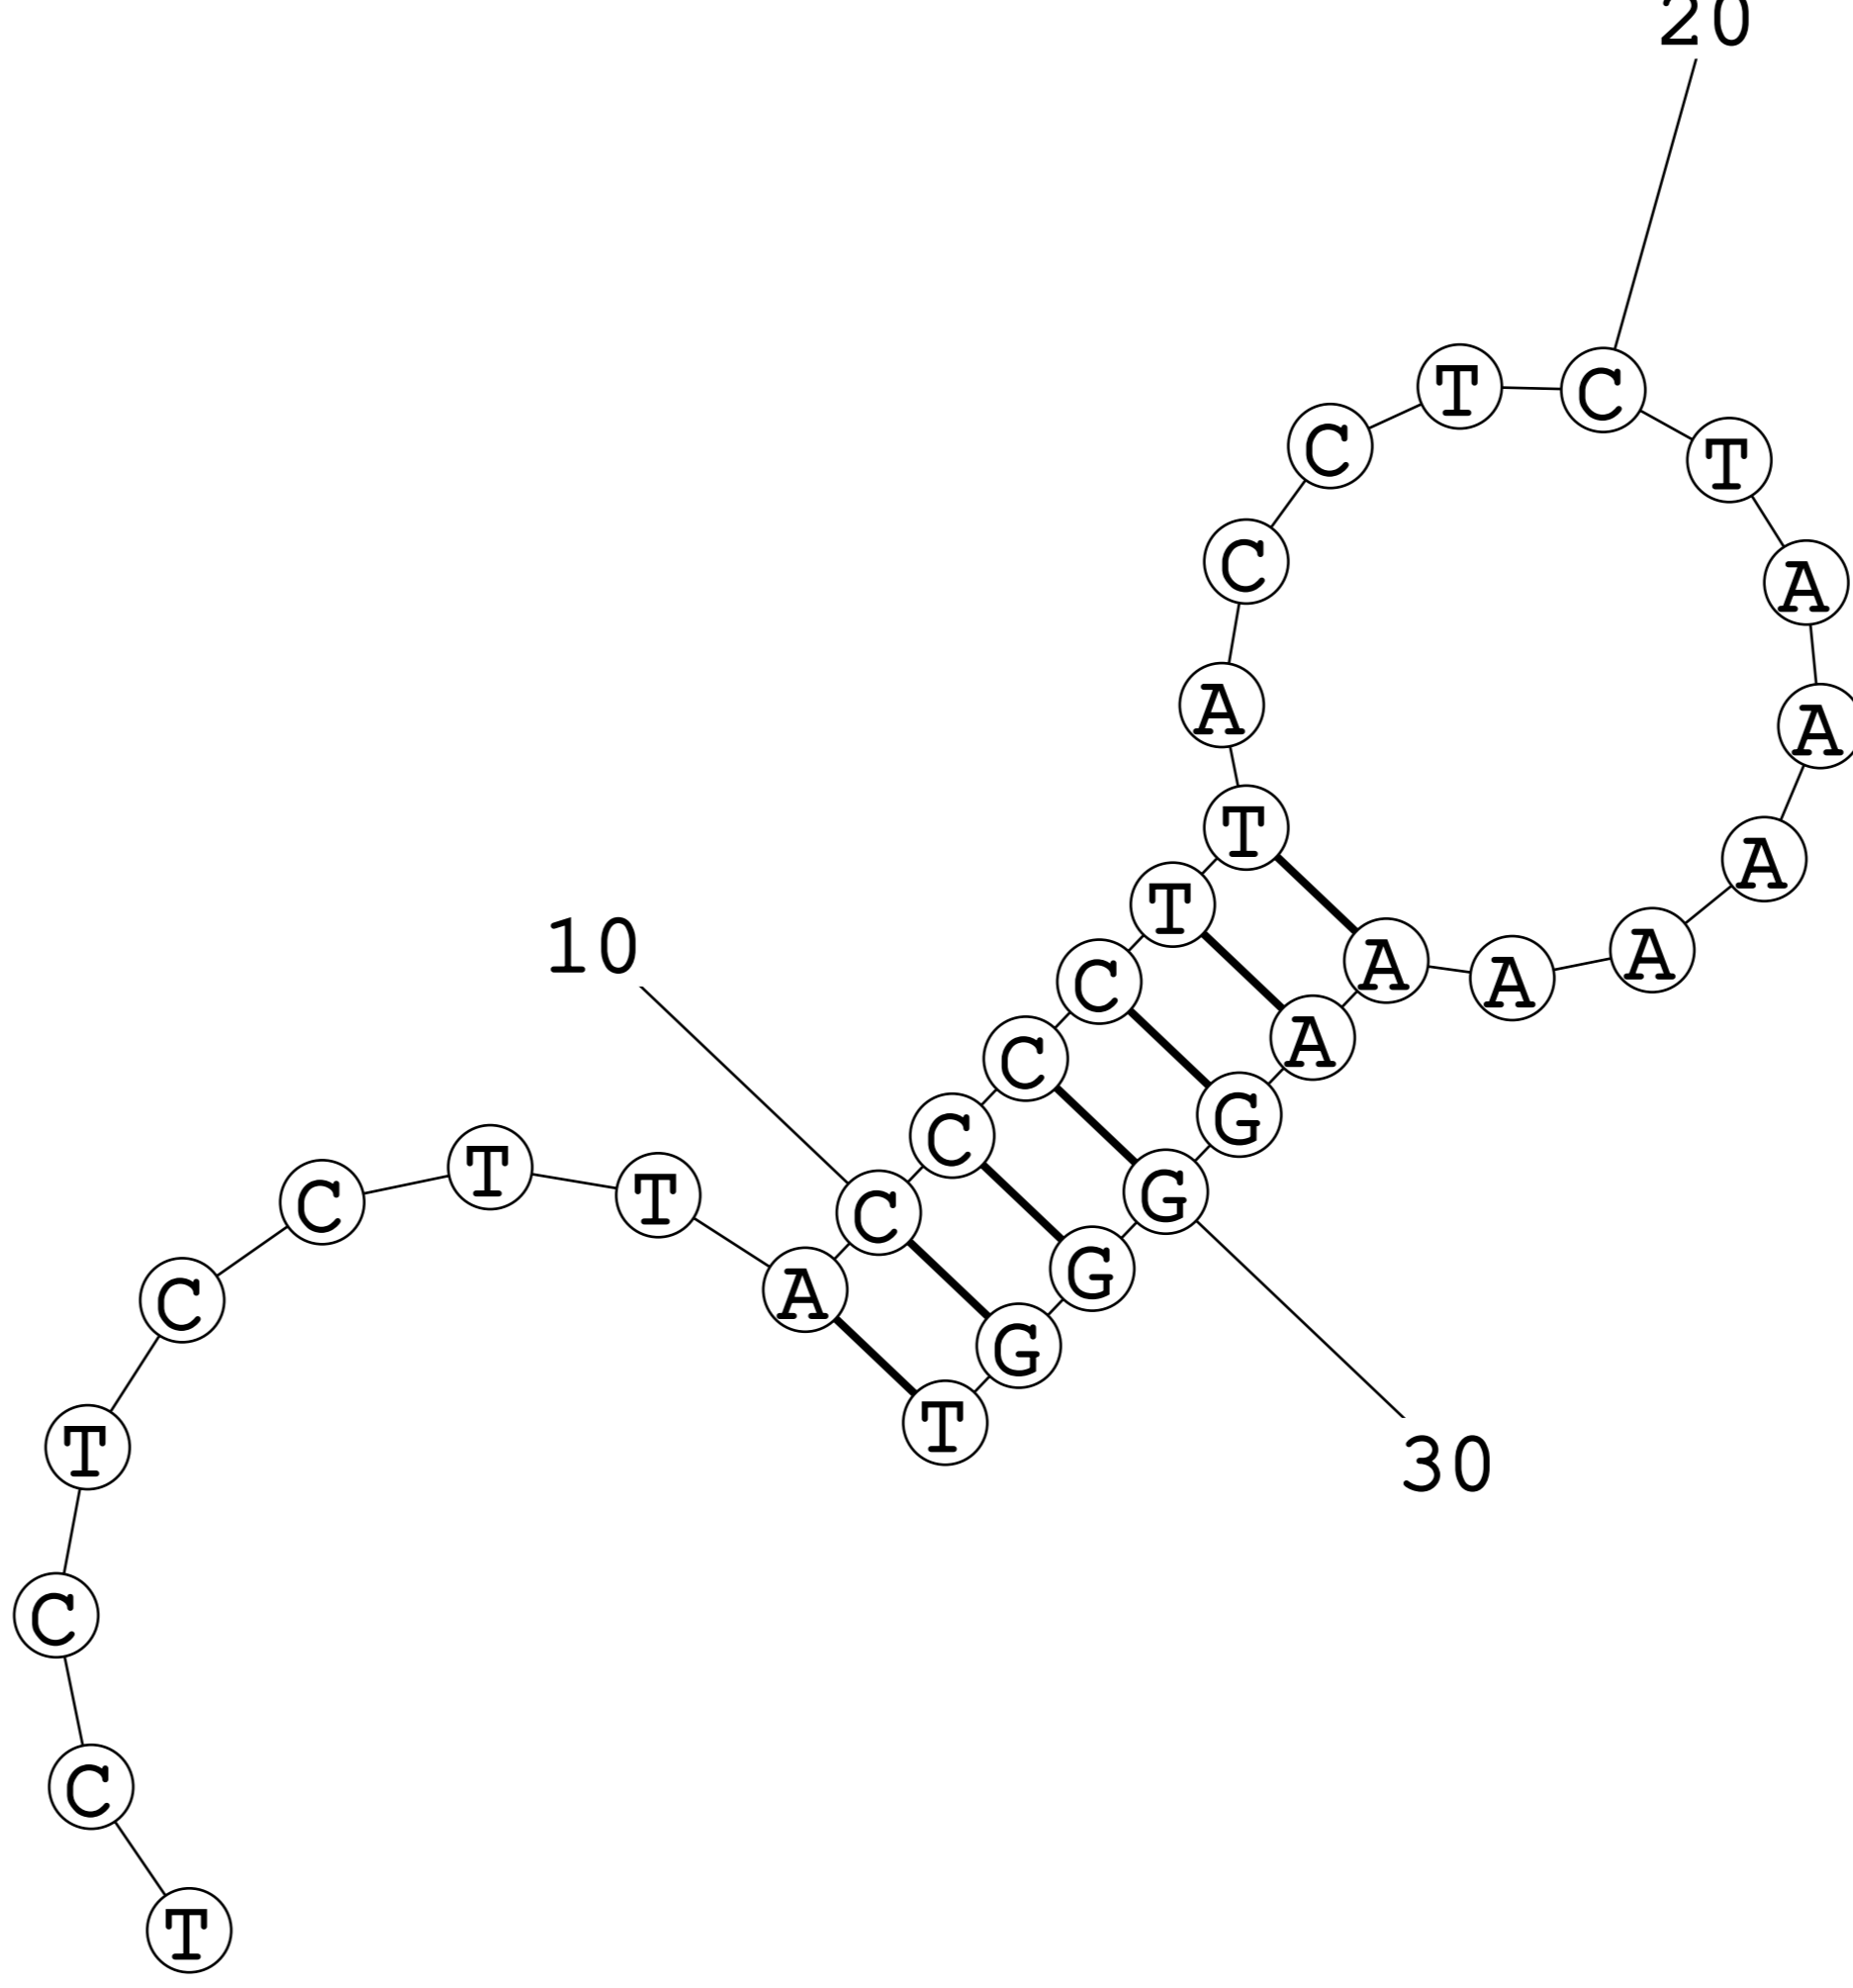

**C. *Epeorus* sp. JZ-2014**

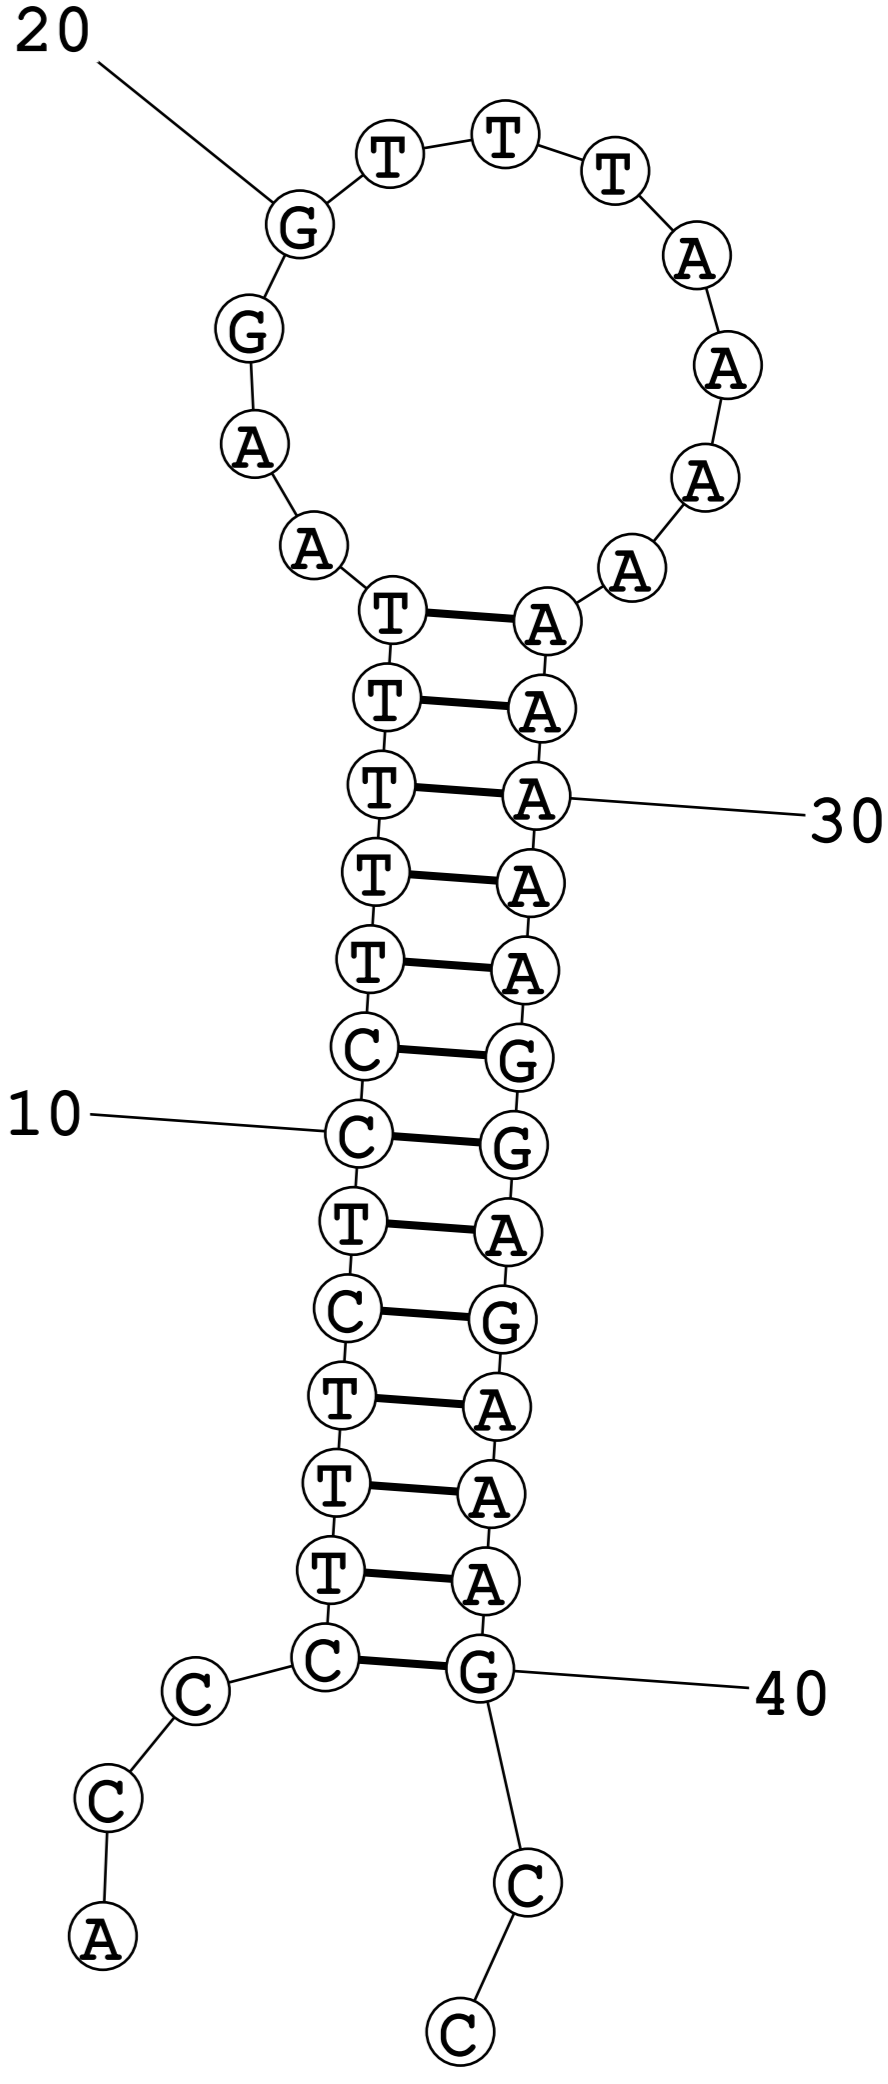

**D. *Epeorus* sp. MT-2014**

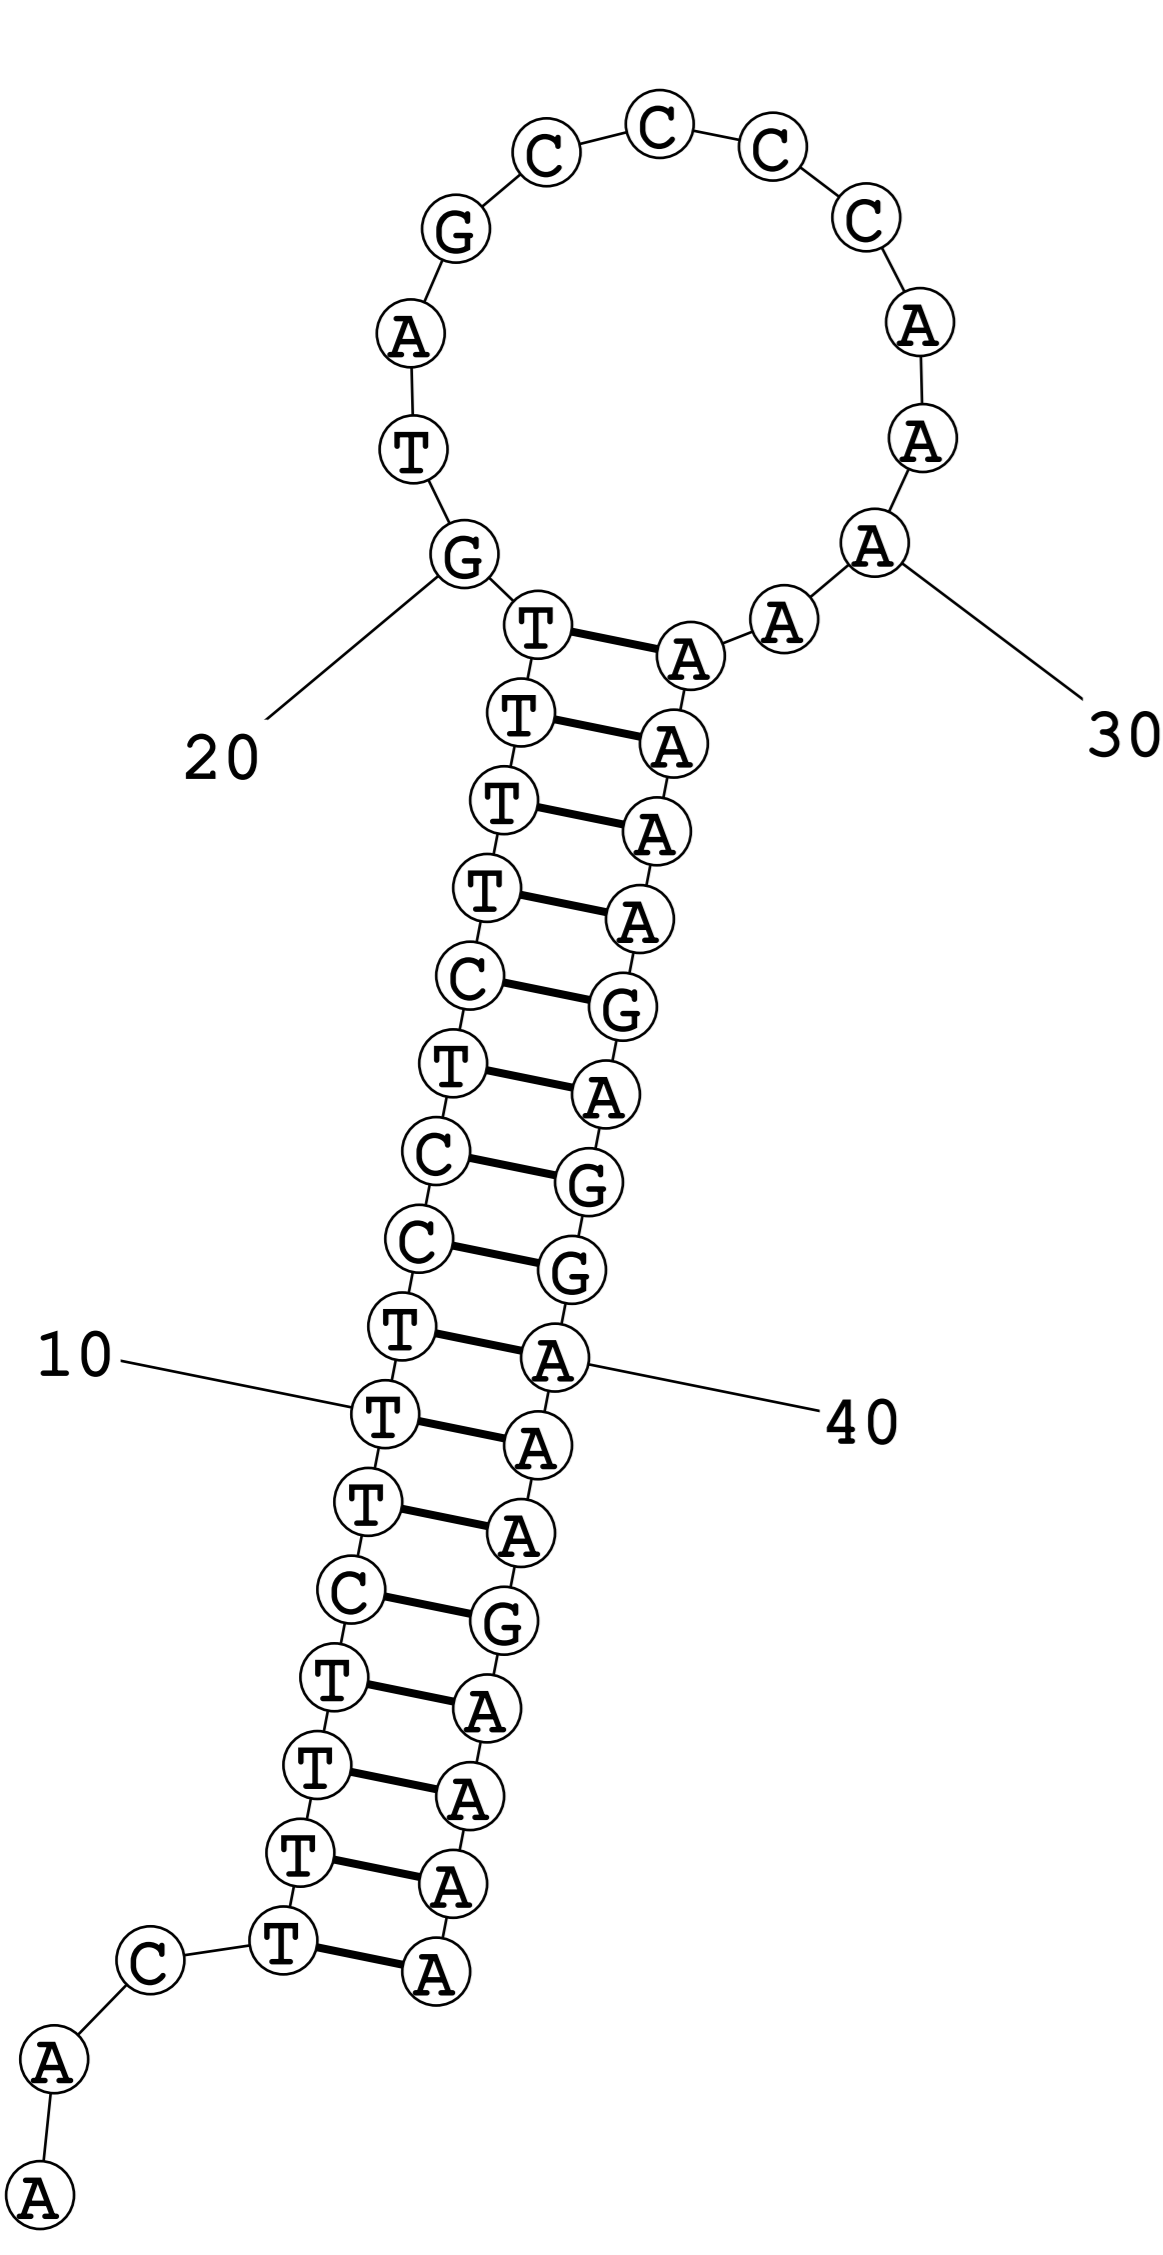

**E. *E. herklotsi***

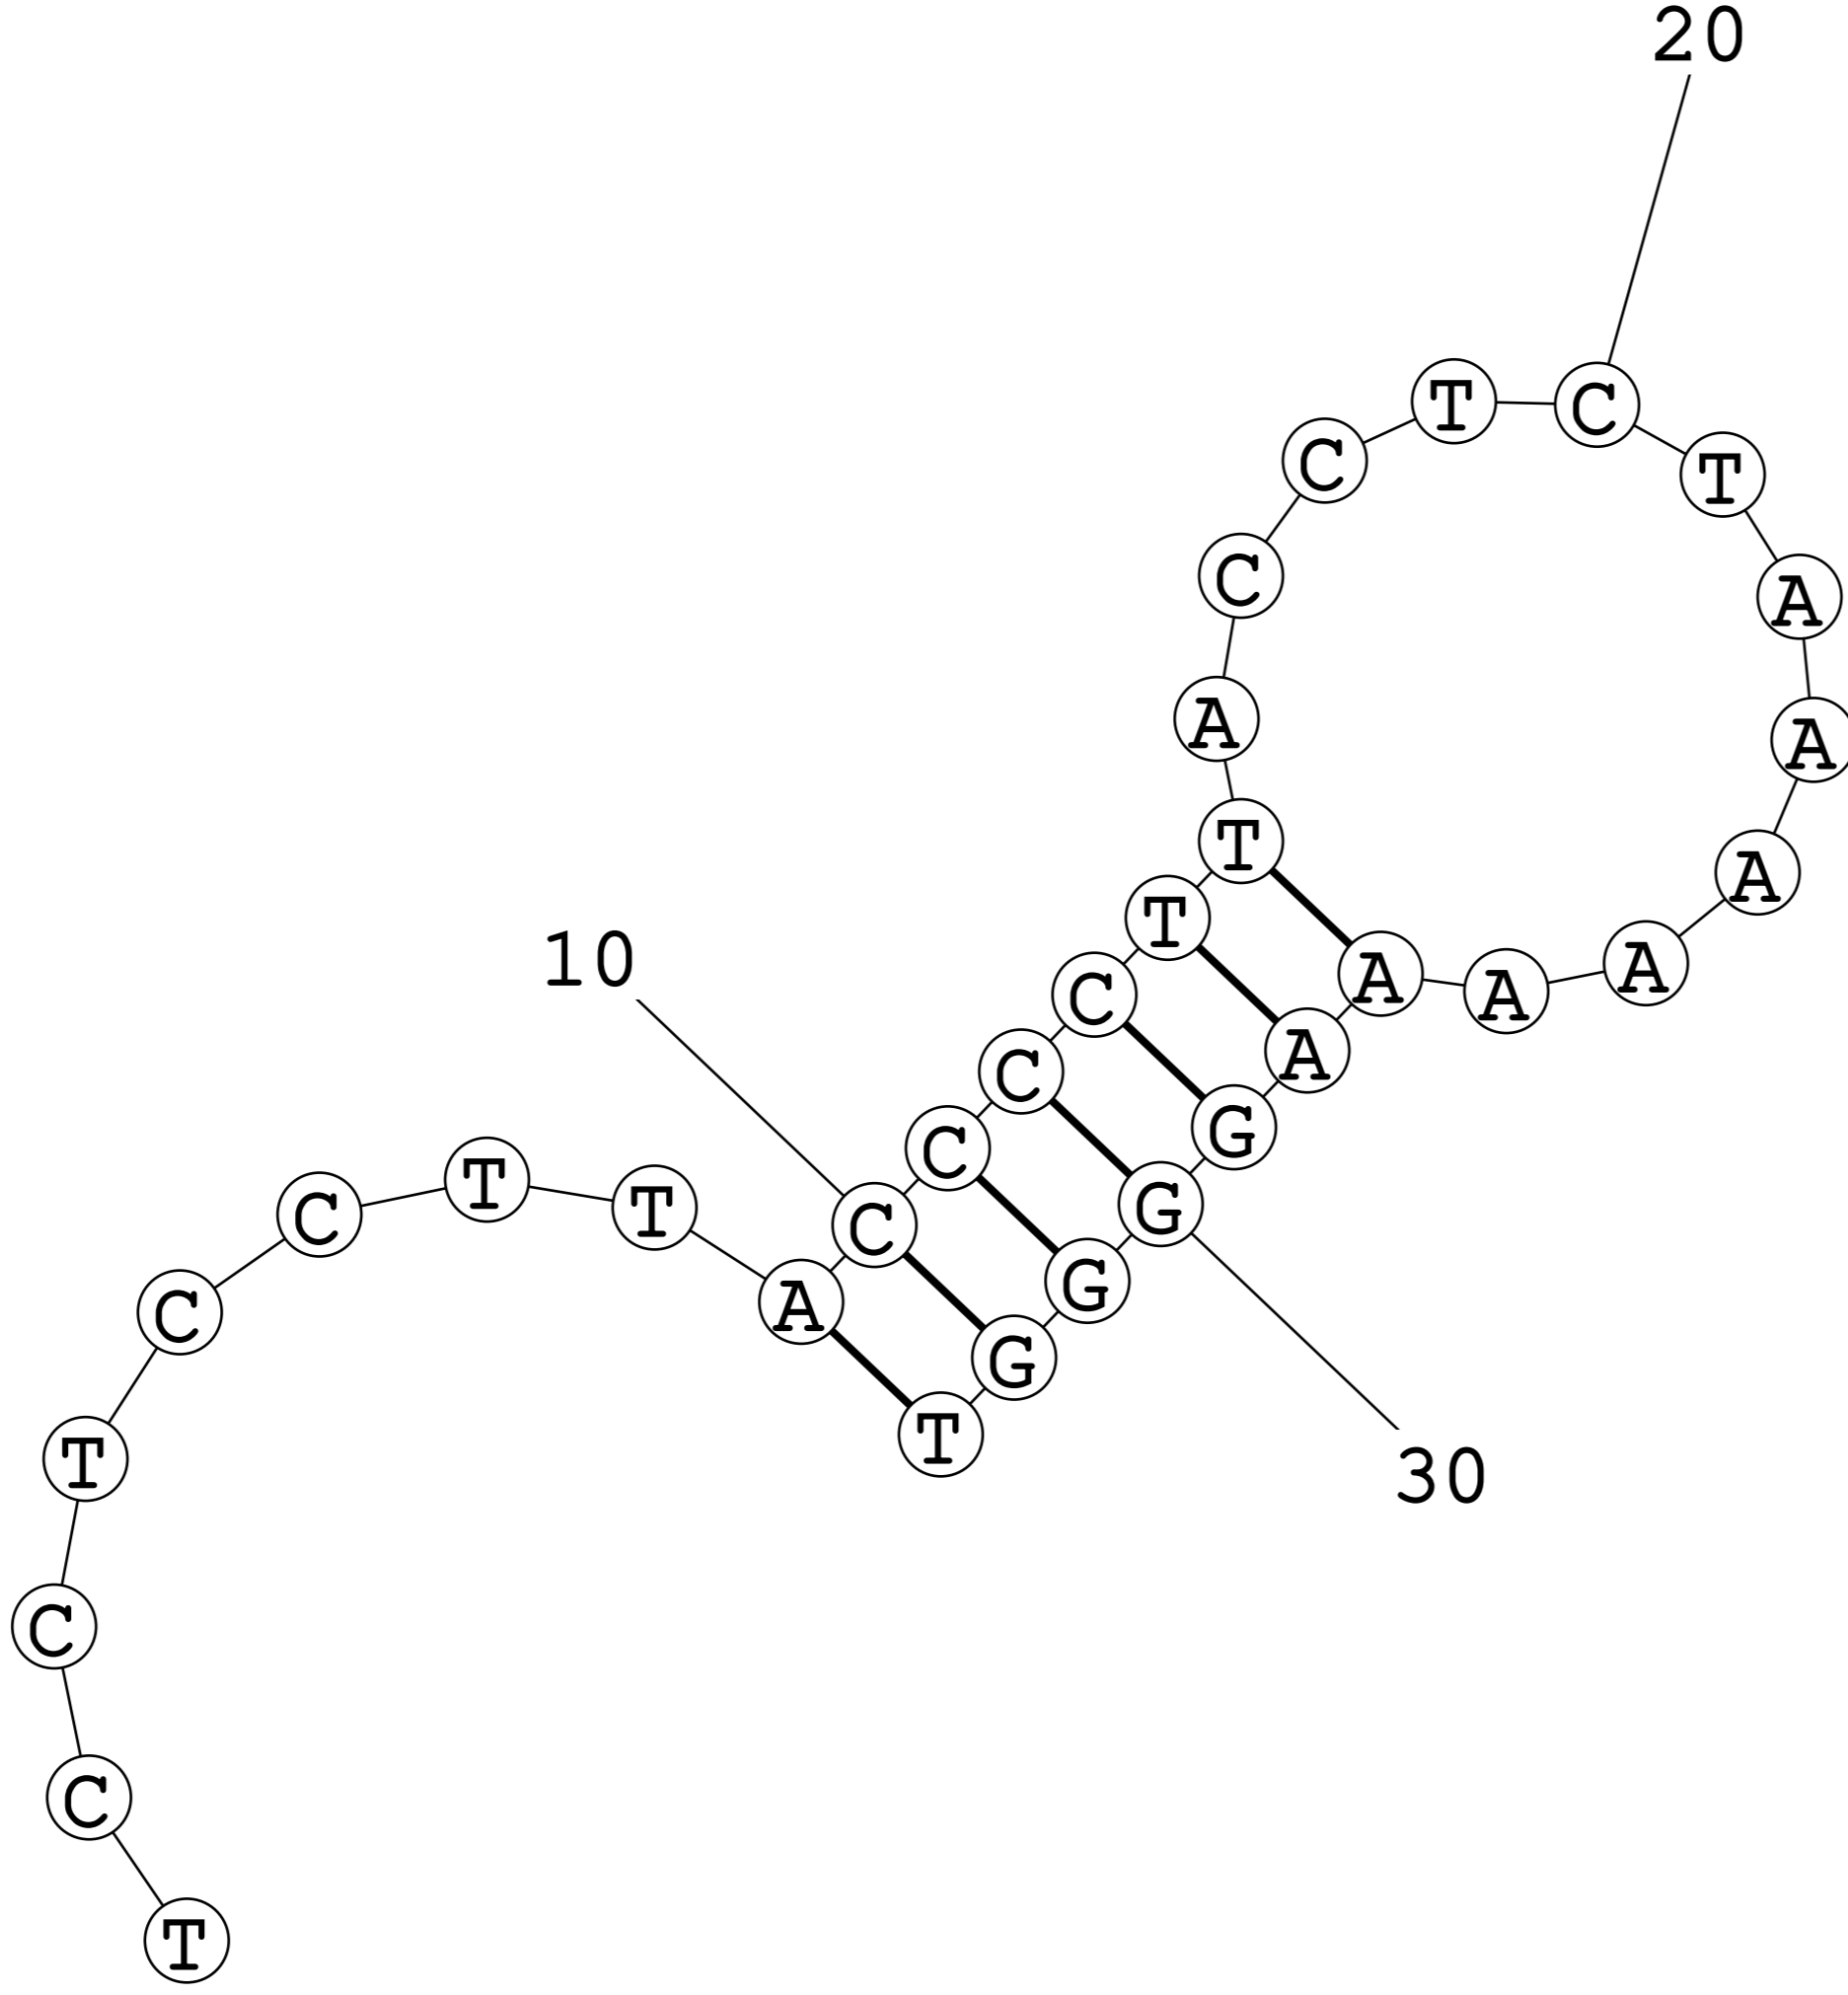

**F. *E. dayongensis***

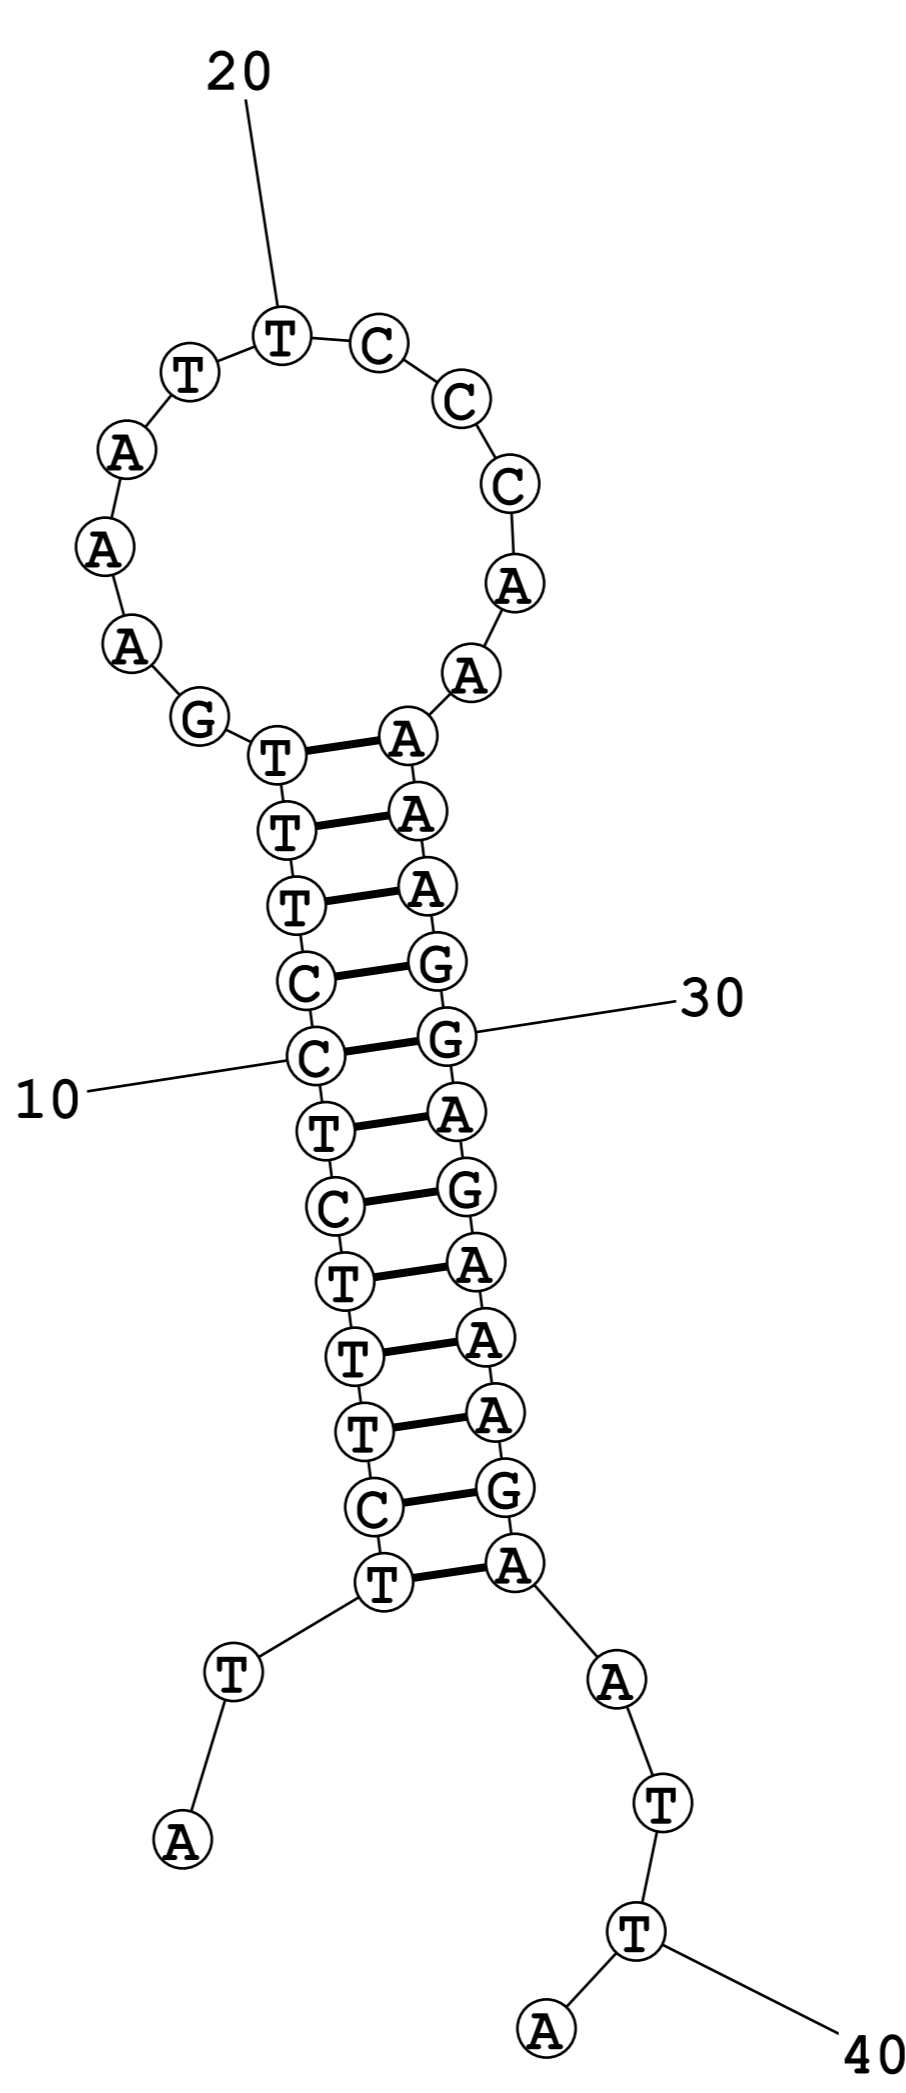

**G. *Epeorus* sp. LA03FY06**

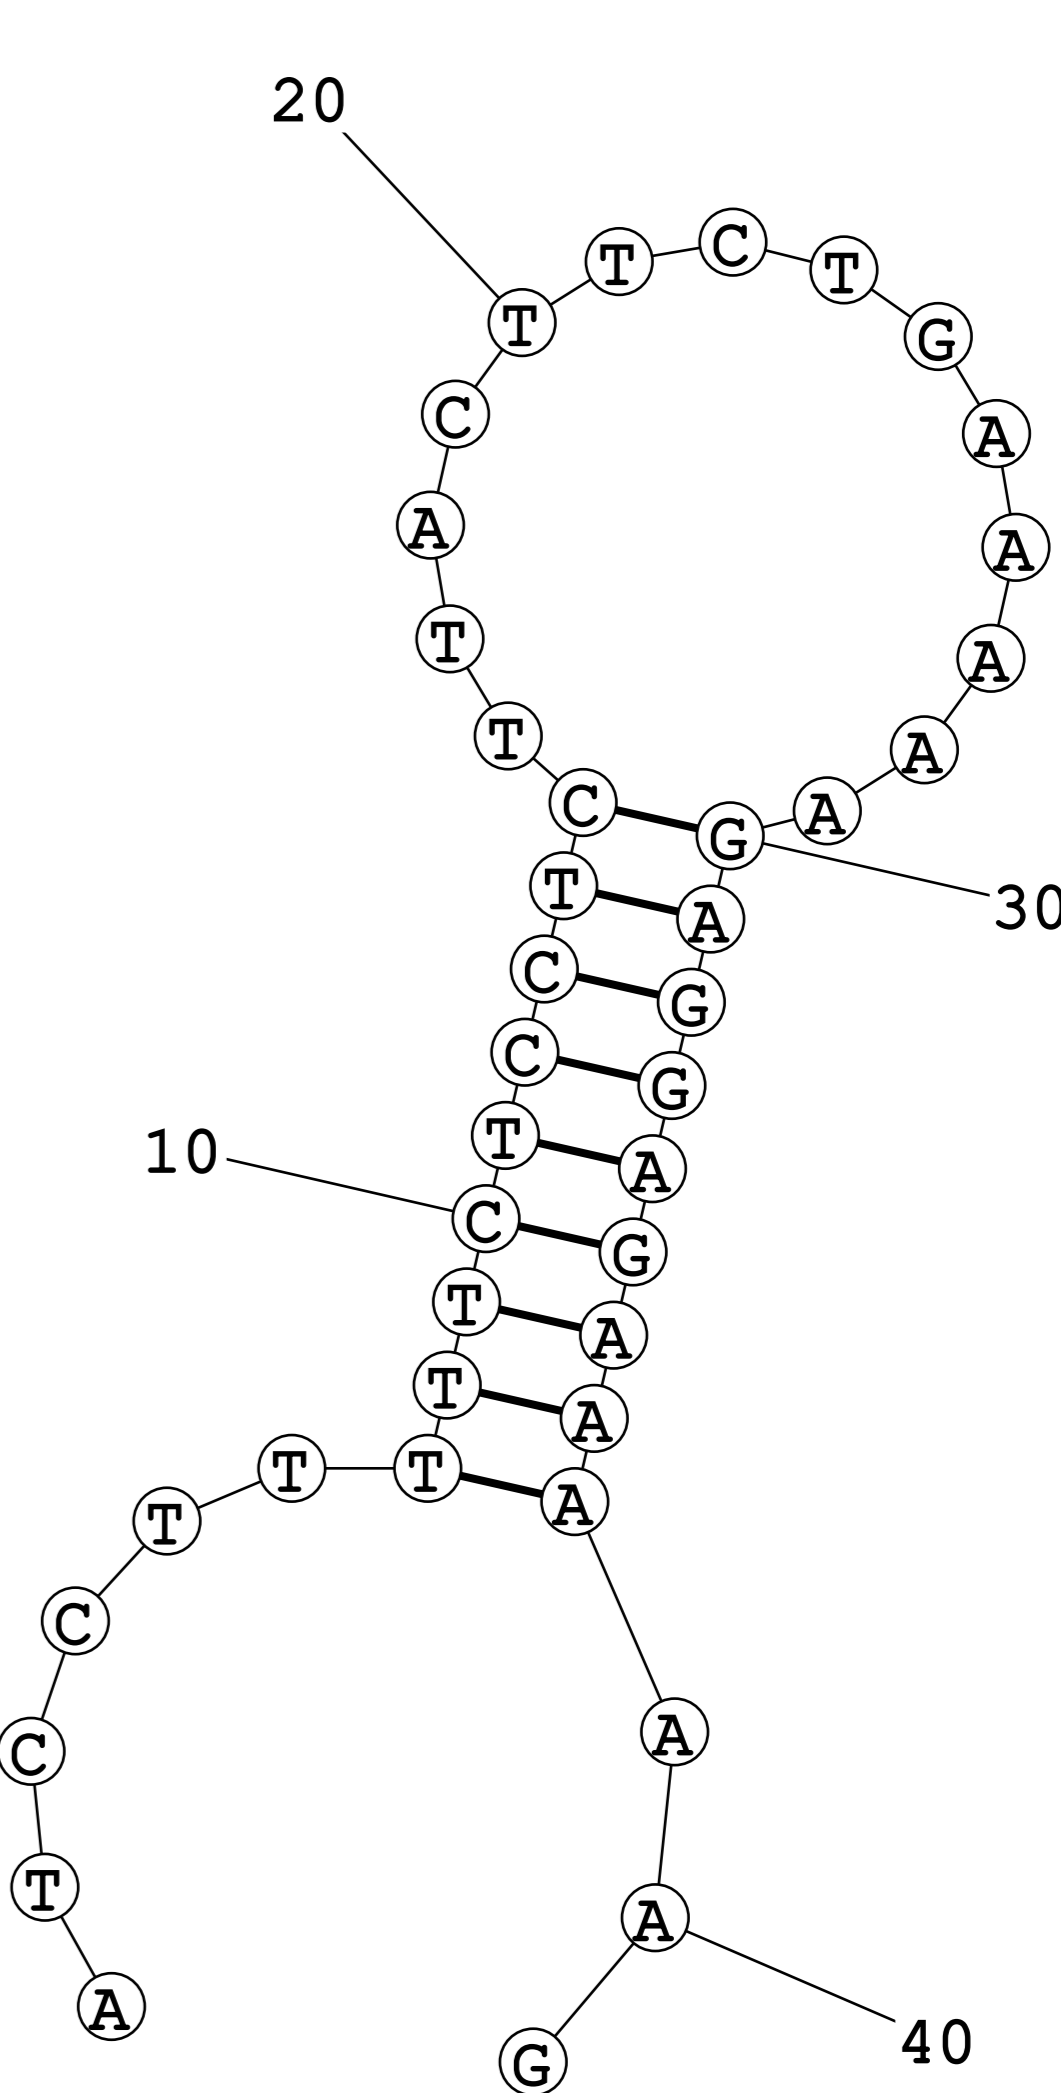

**H. *Epeorus* sp. XL-2019**

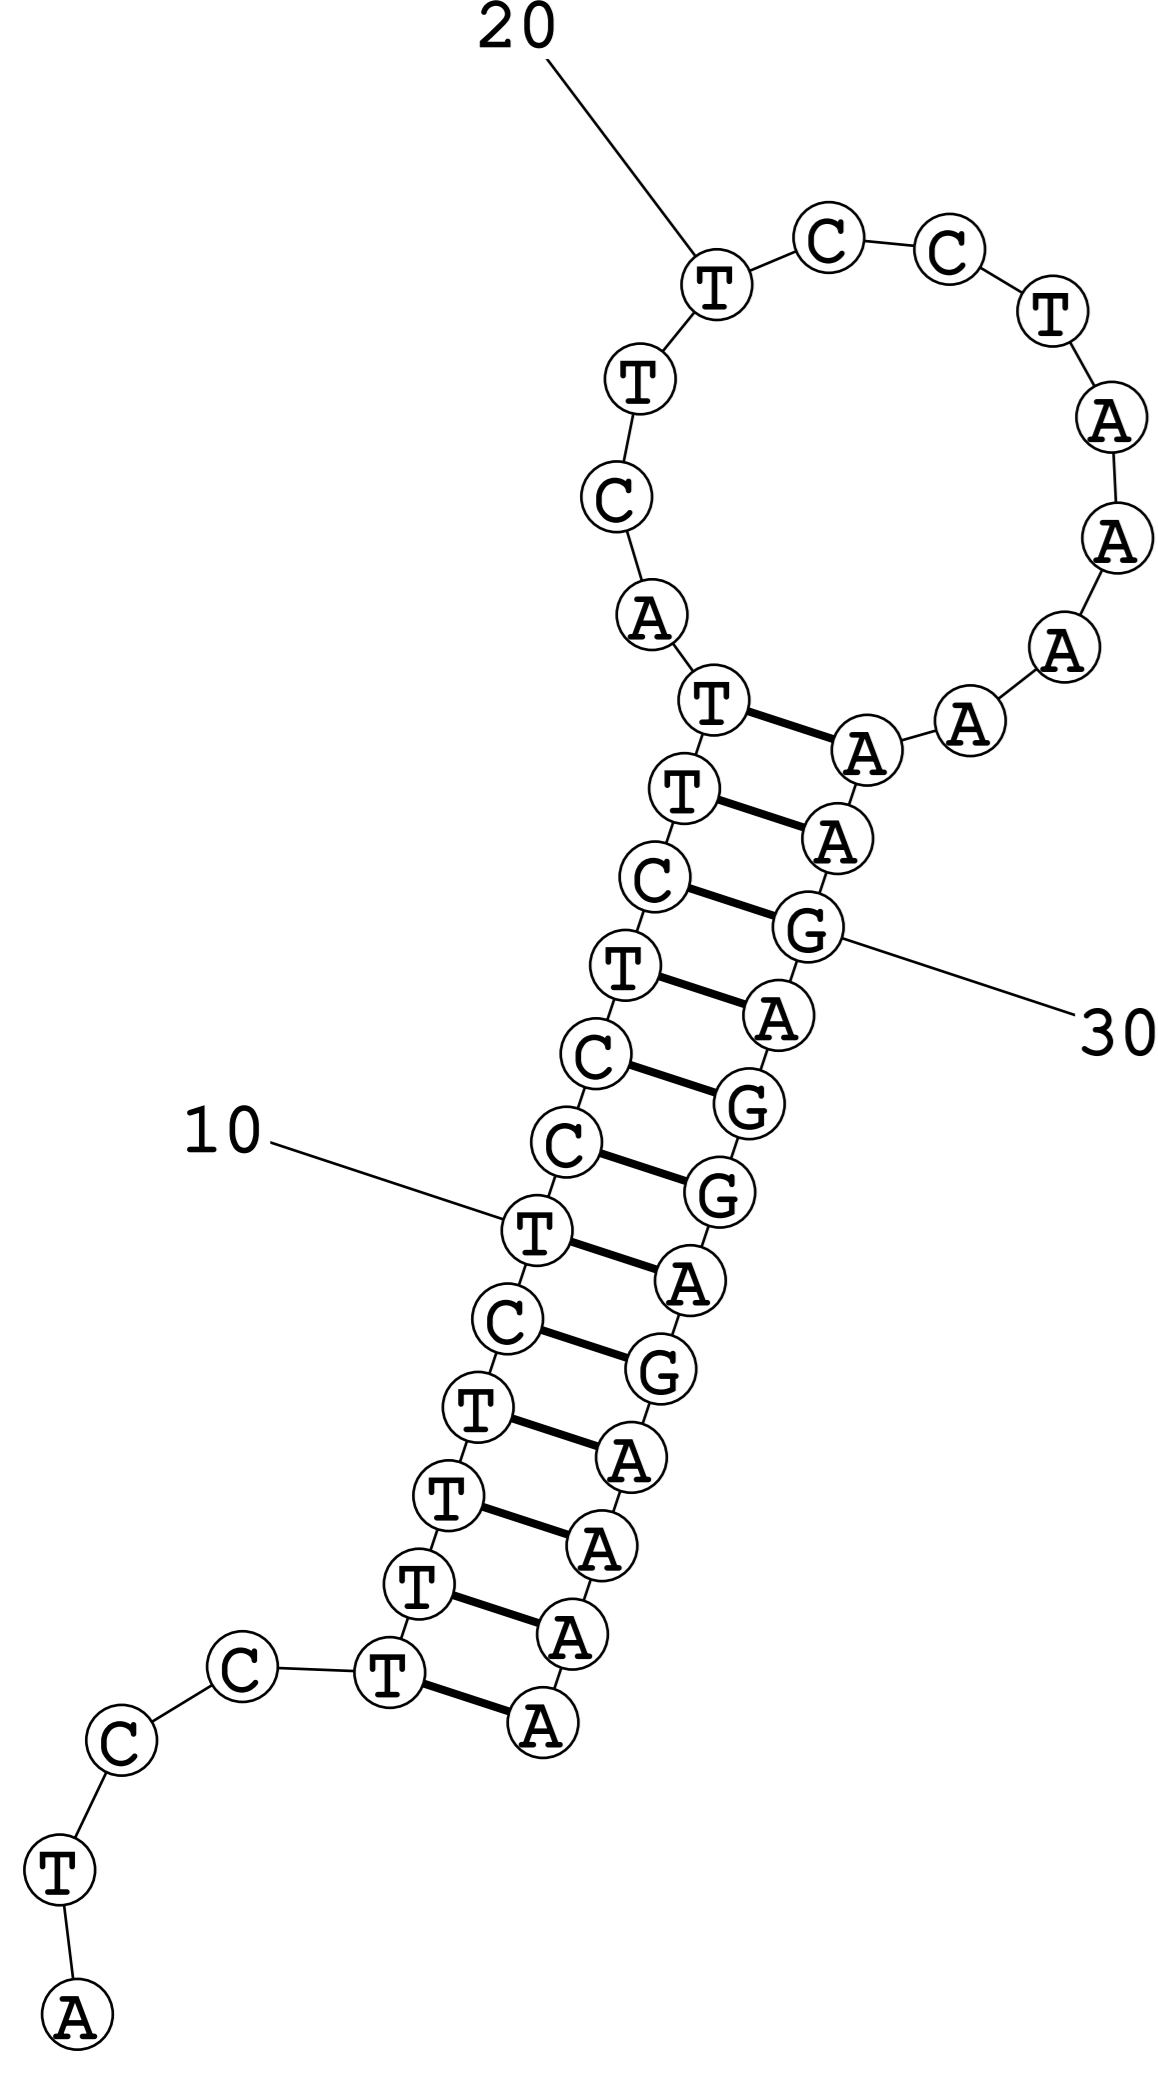

**I. *A. furcata***

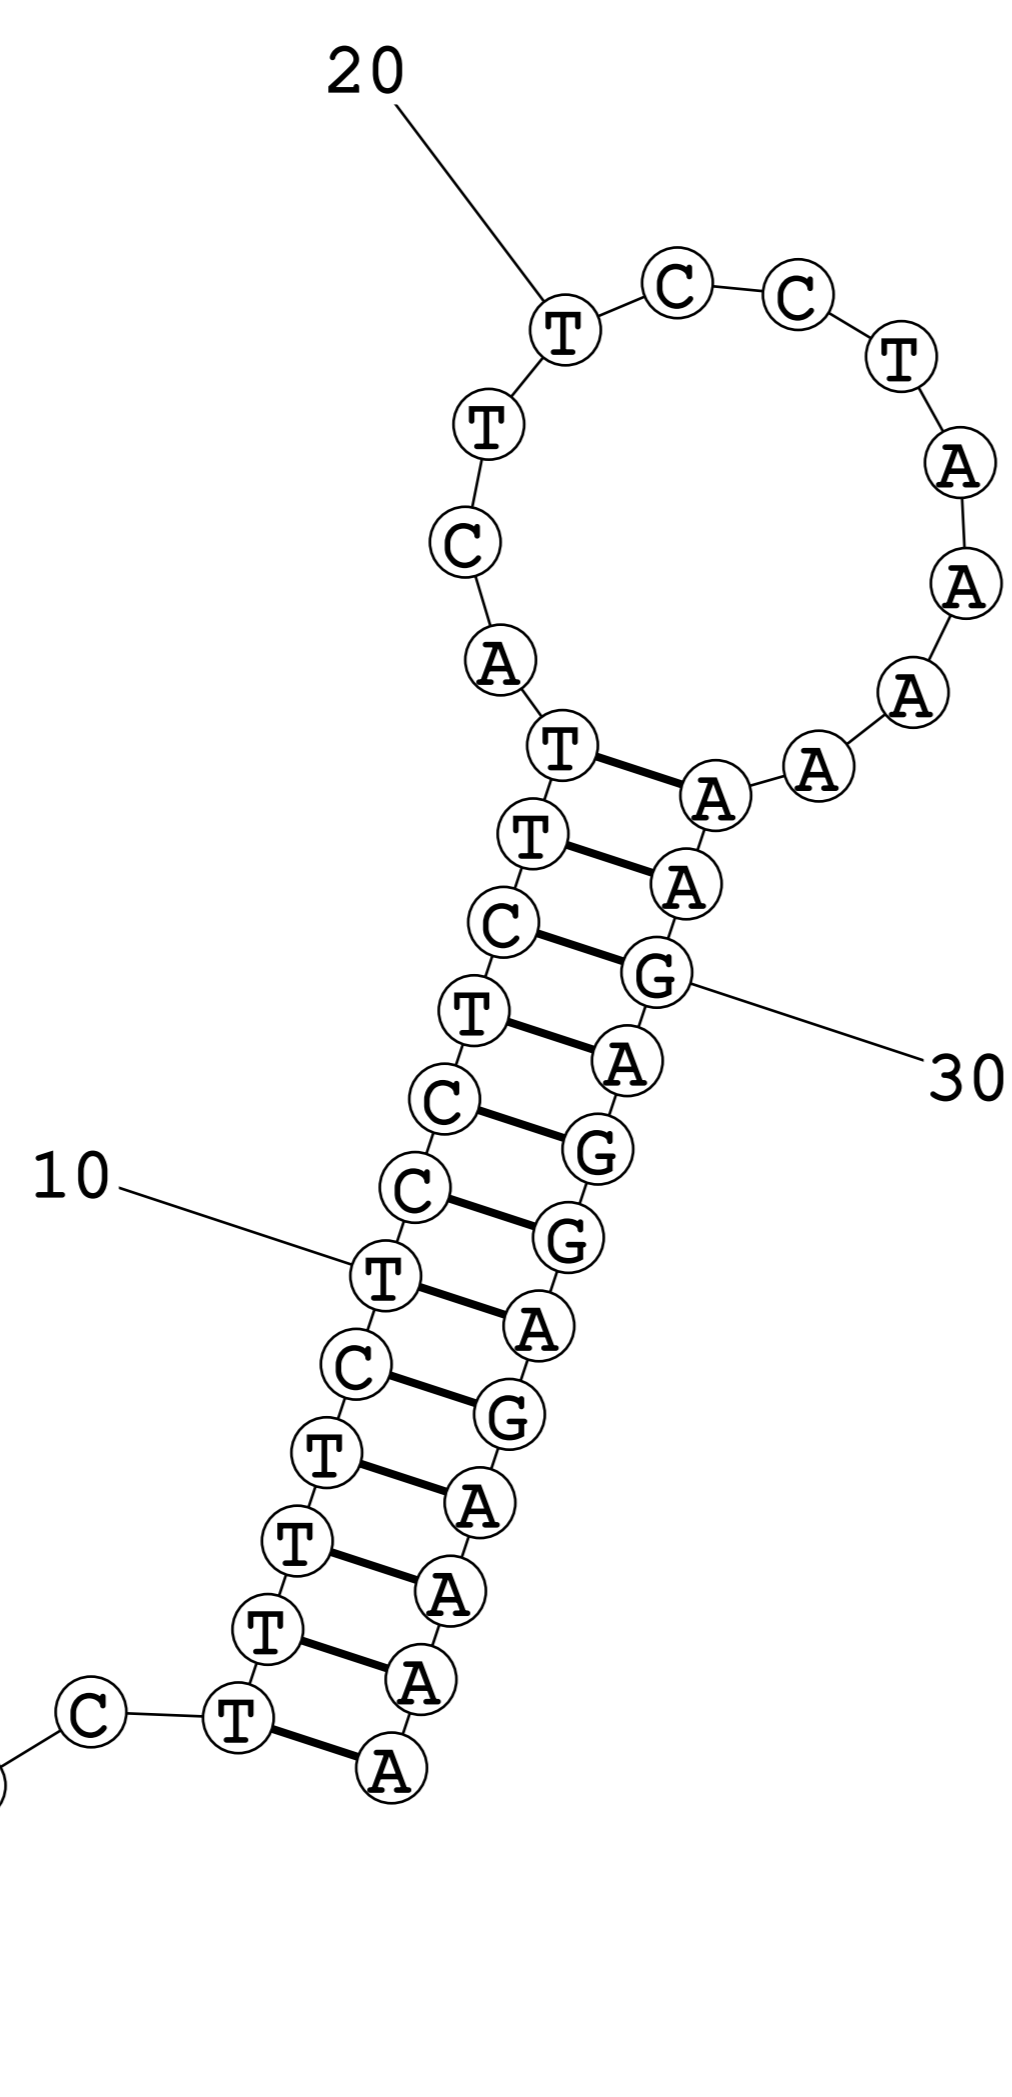

**J. *A. rubromaculata***

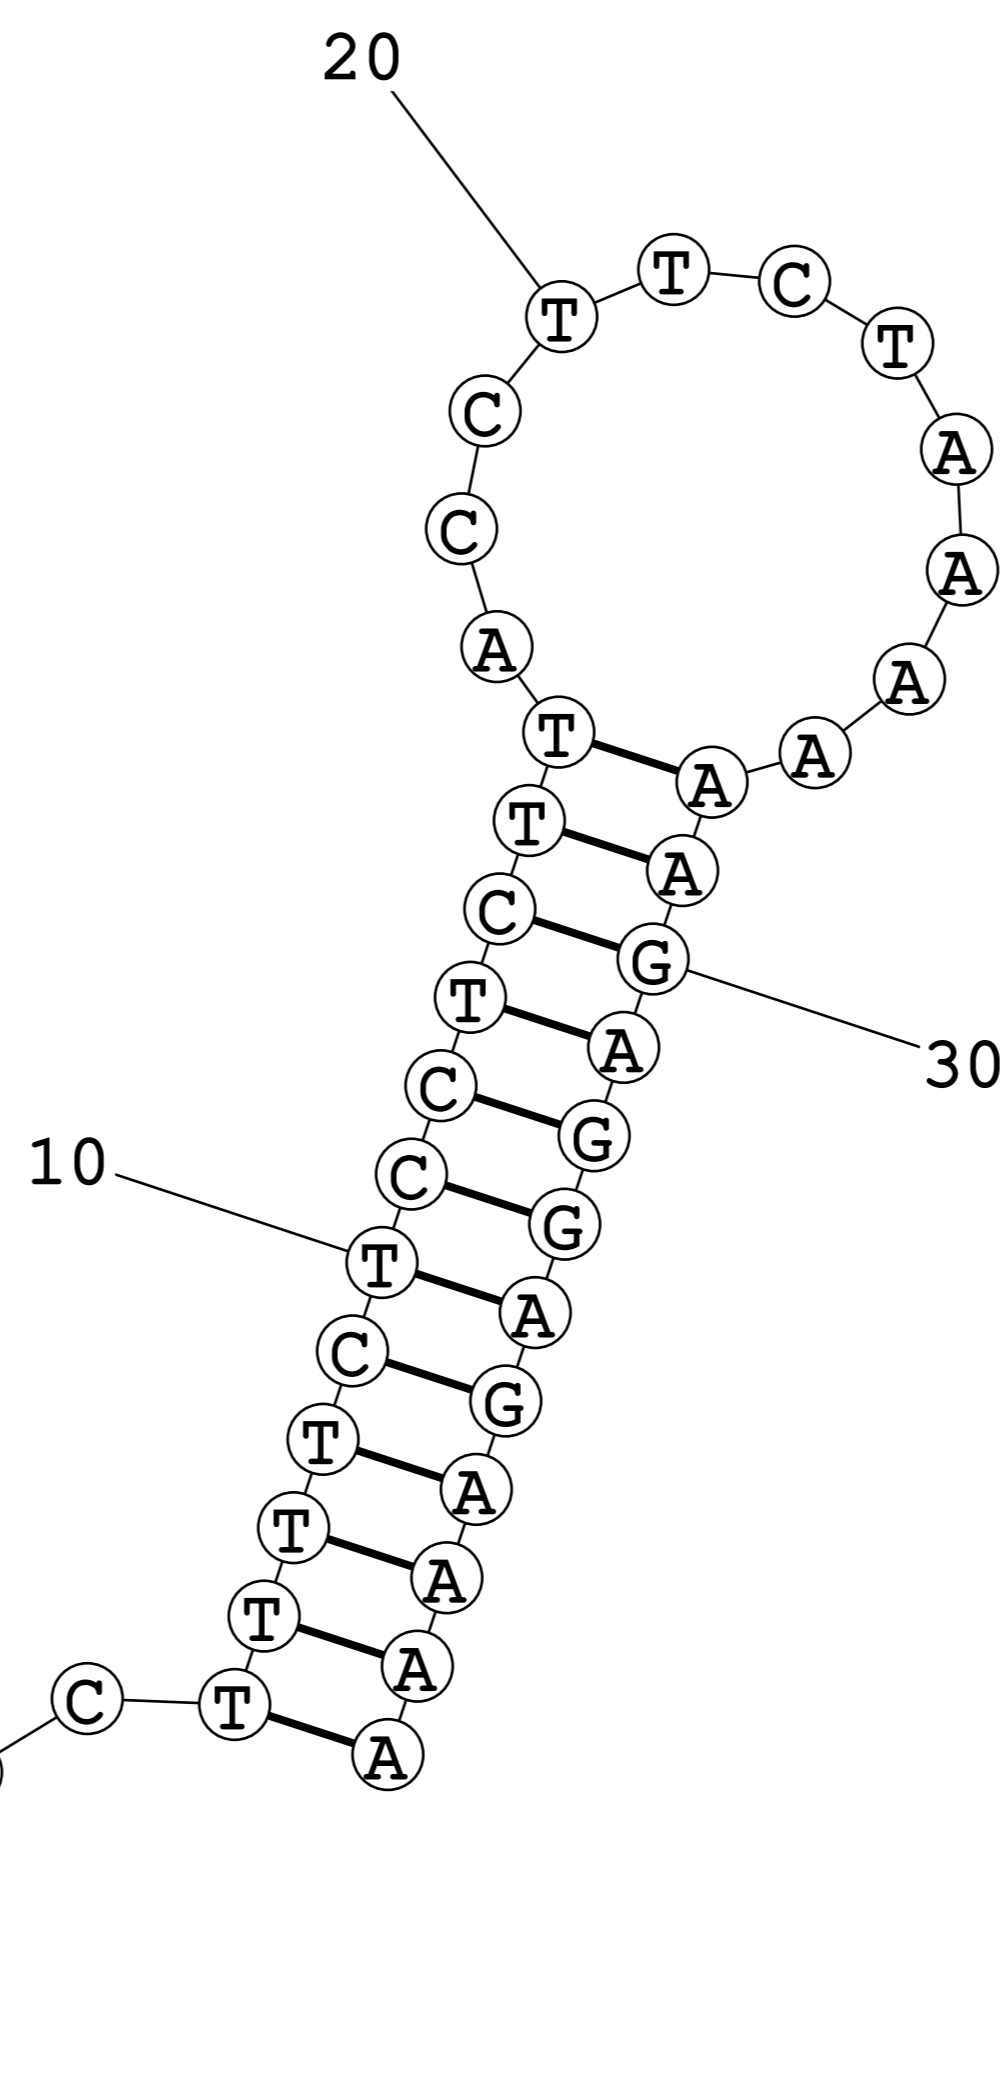

**K. *Afronurus* sp. YW01BF06**

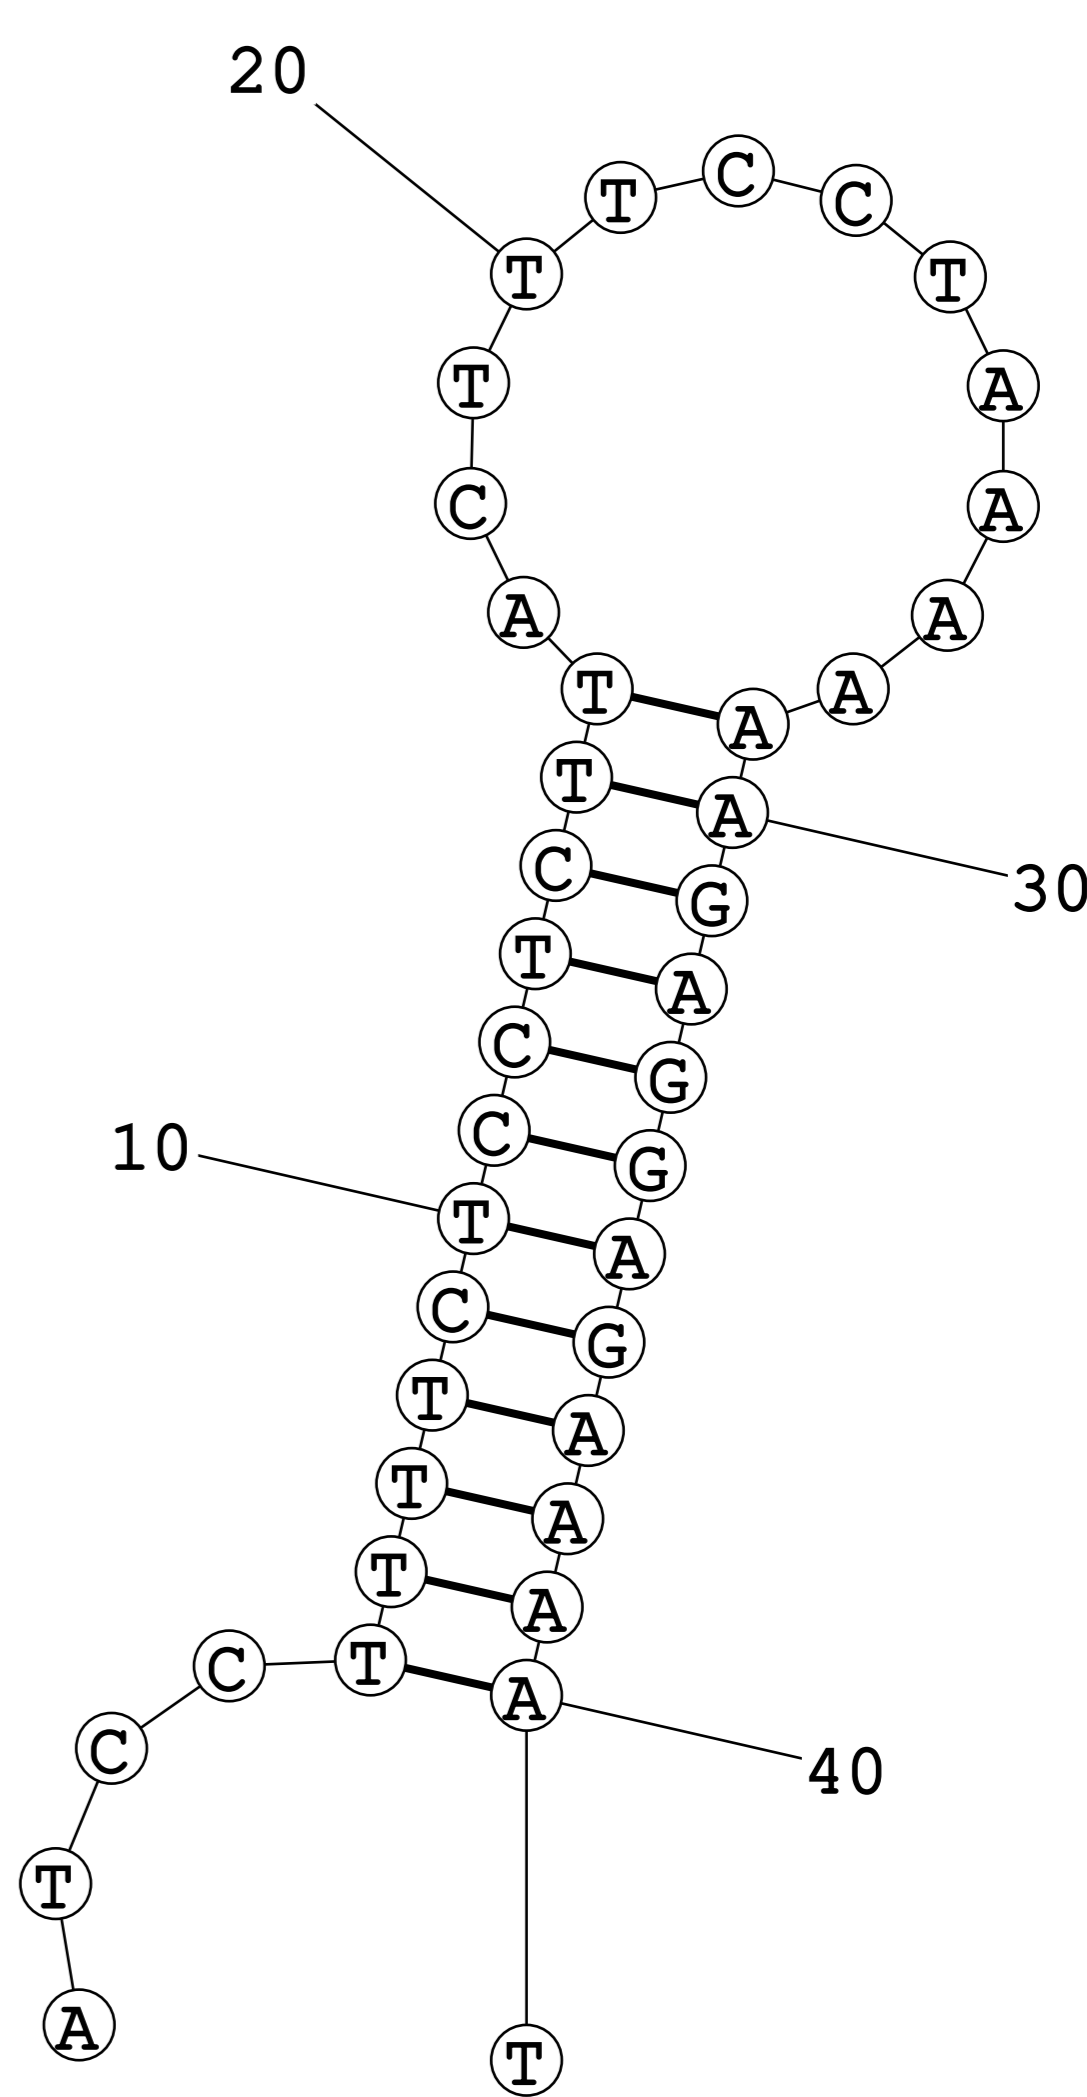

**L. *Afronurus* sp. LS53BF04**

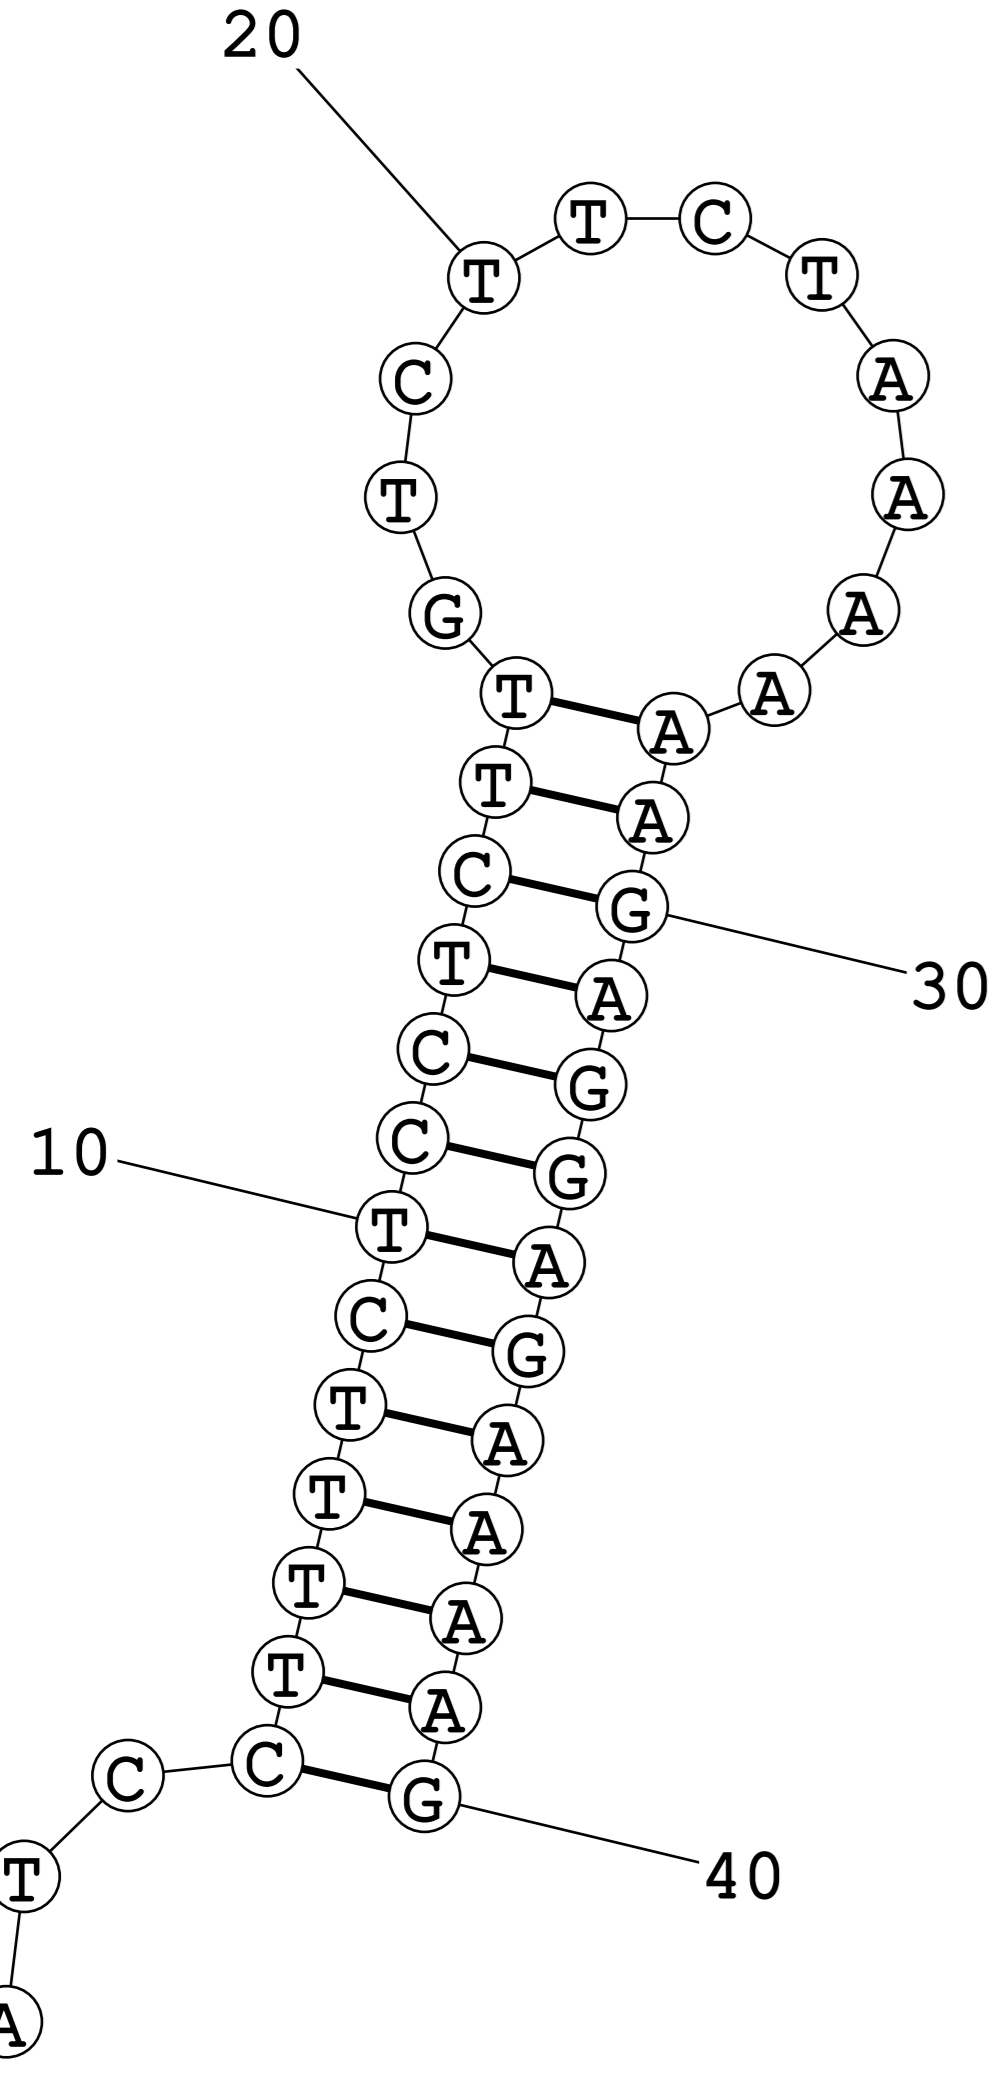

**M. *A. yixingensis***

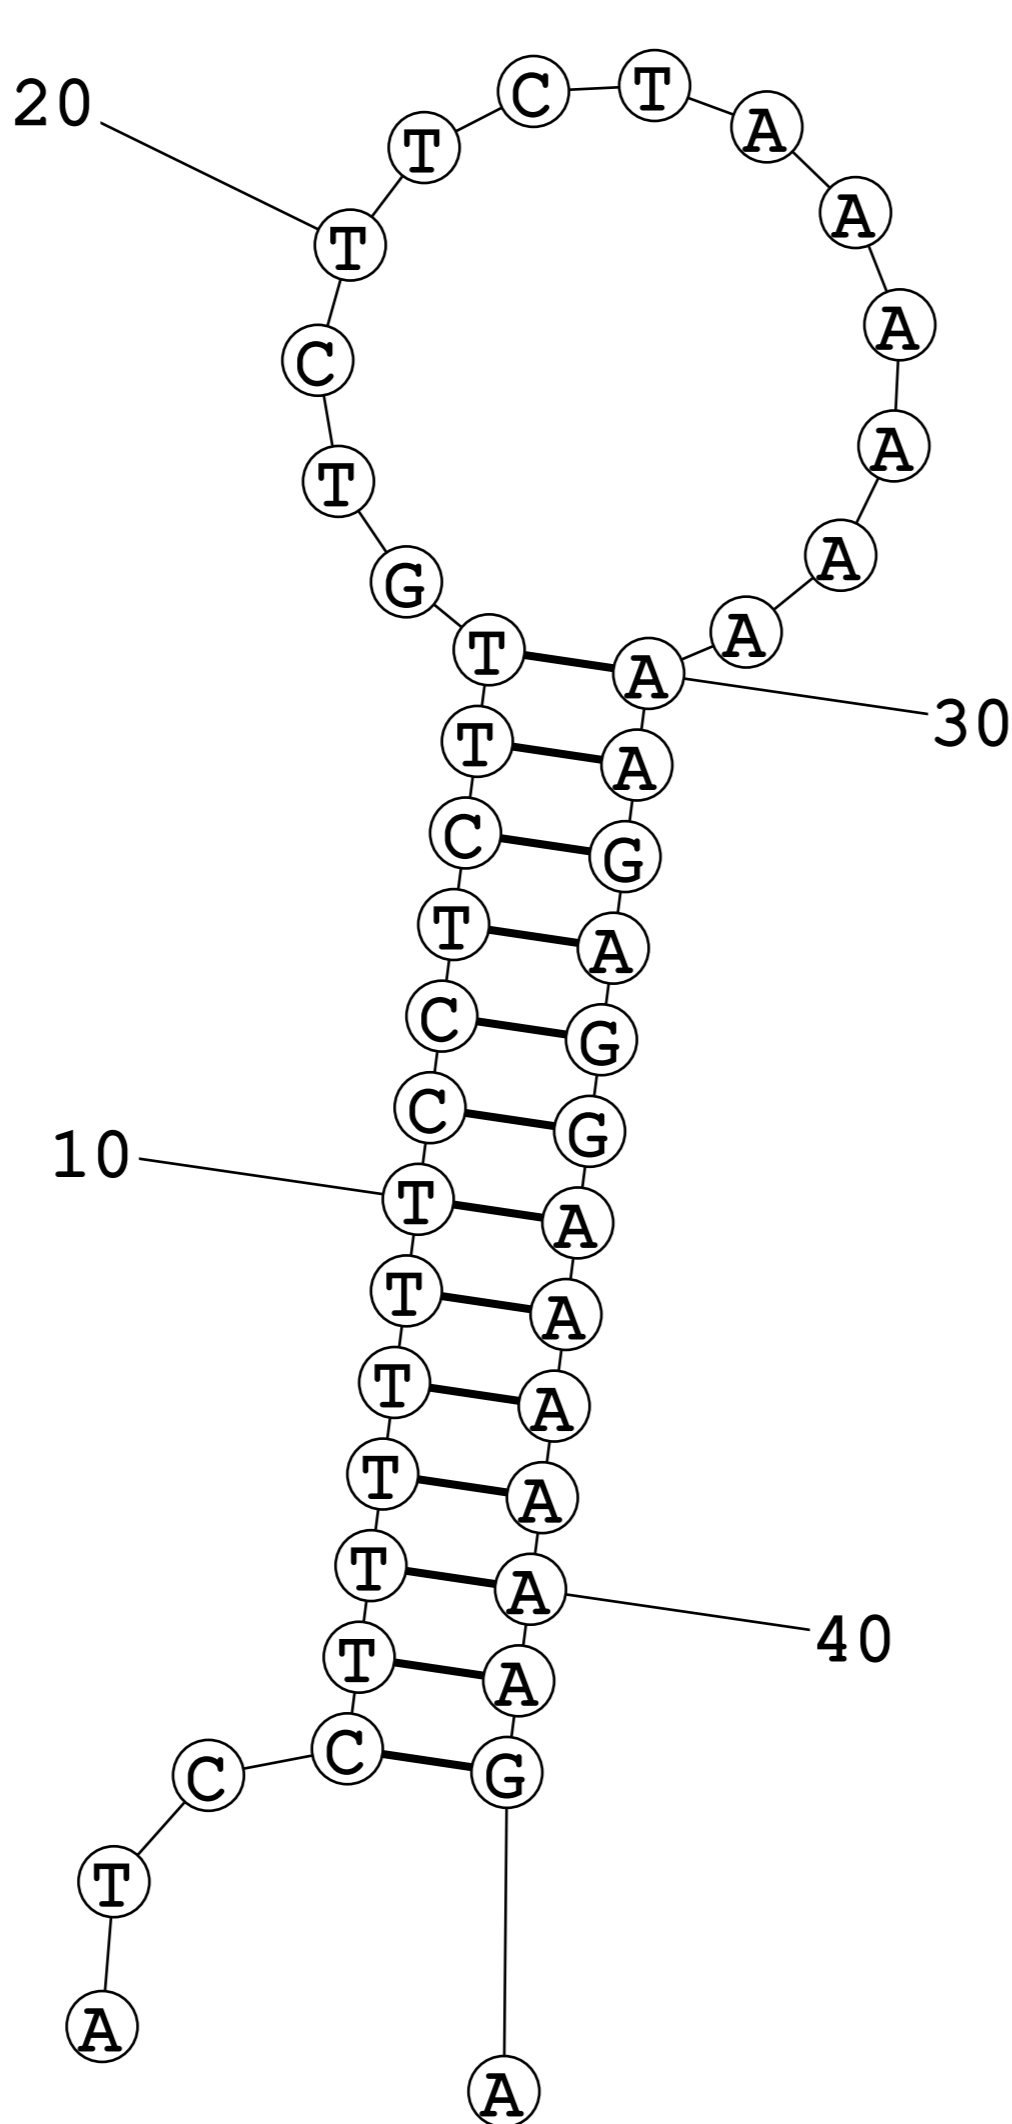

**N. *Afronurus* sp. 07BF85**

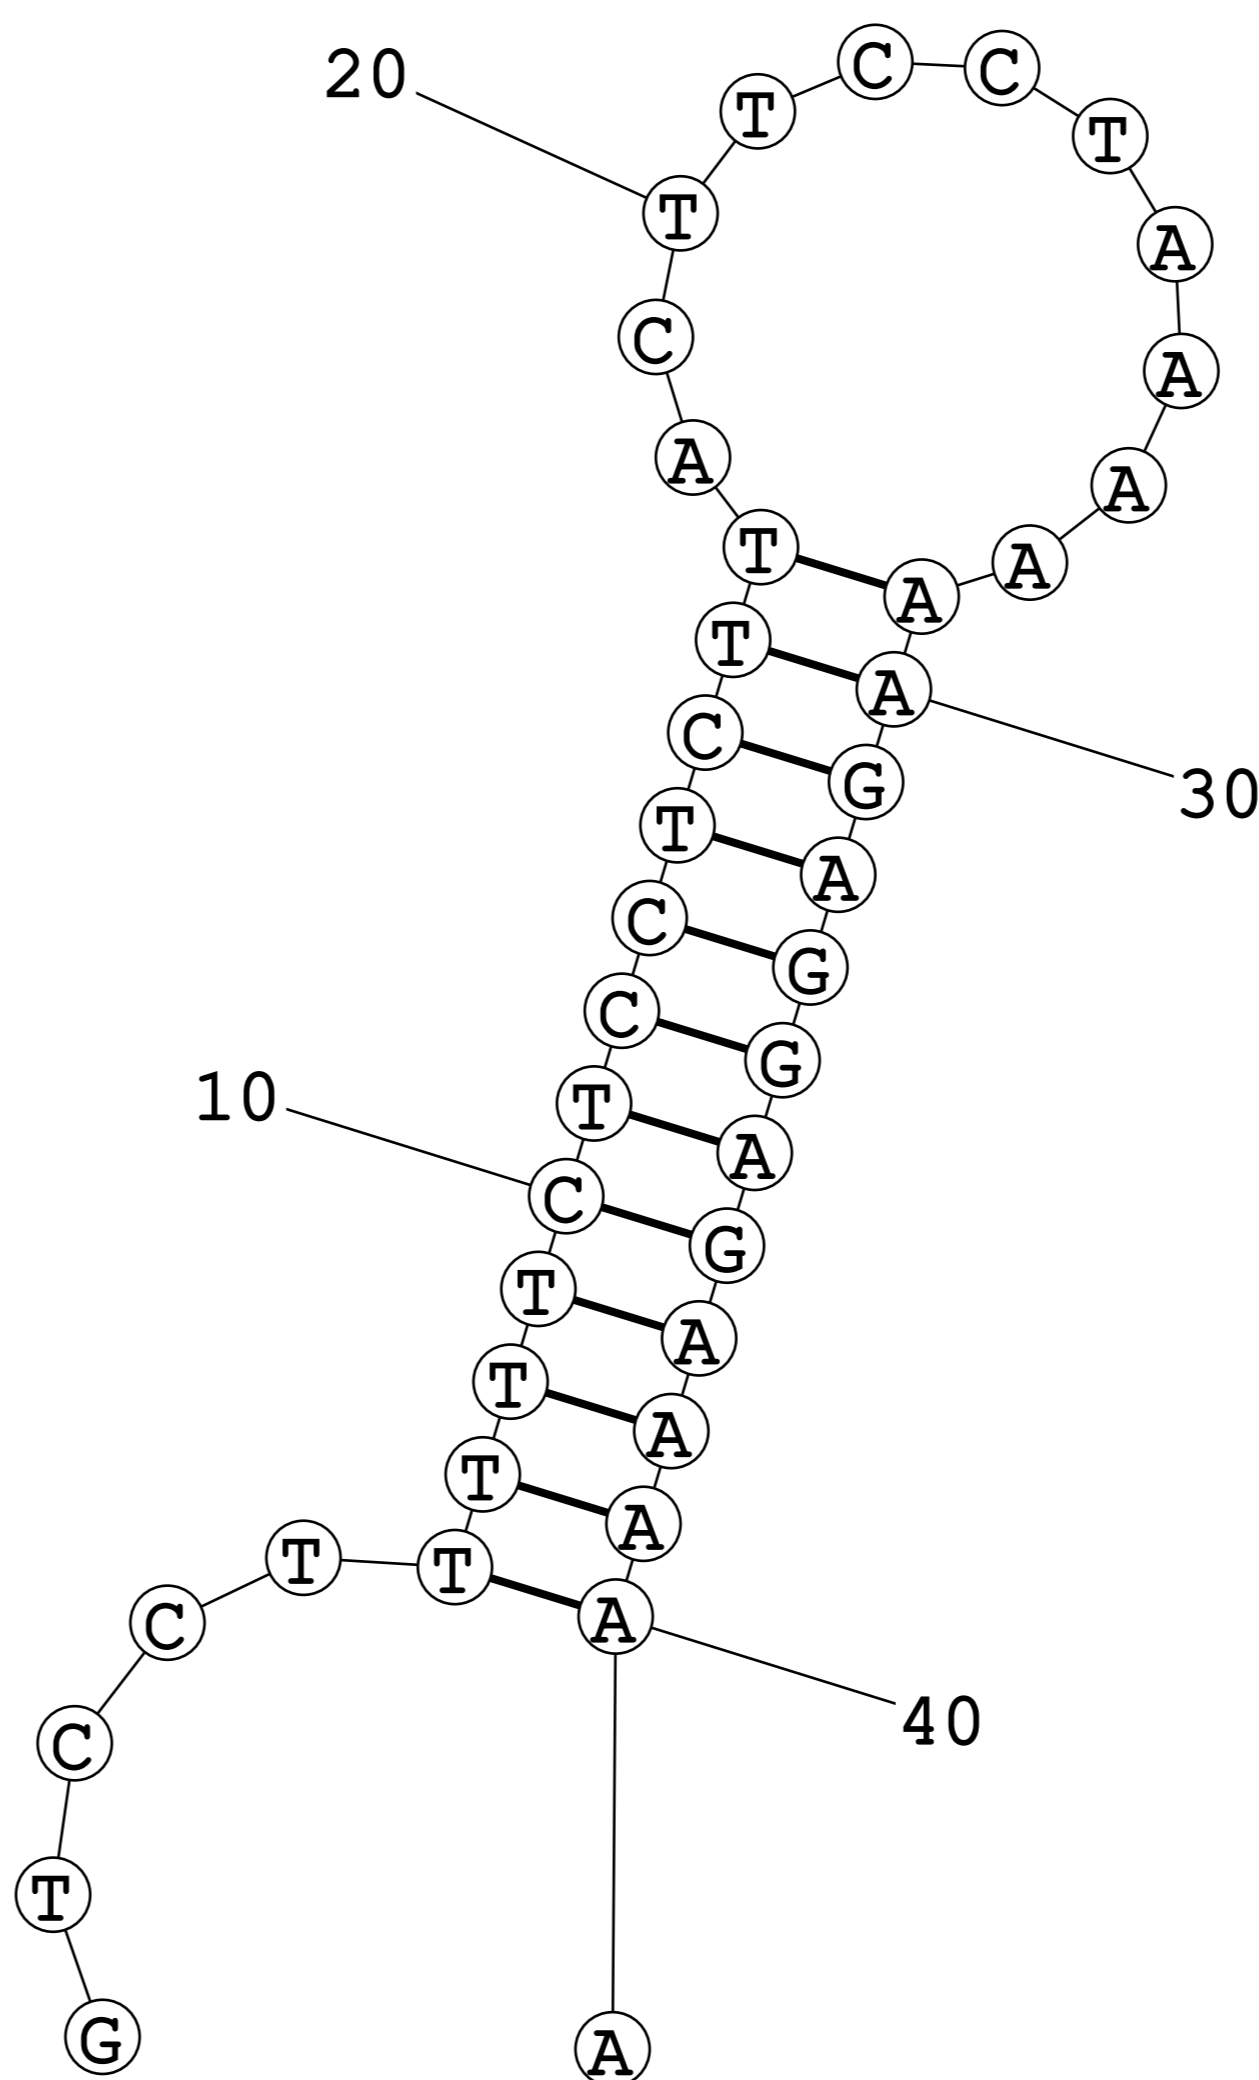

**O. *Afronurus* sp. 07BF86**

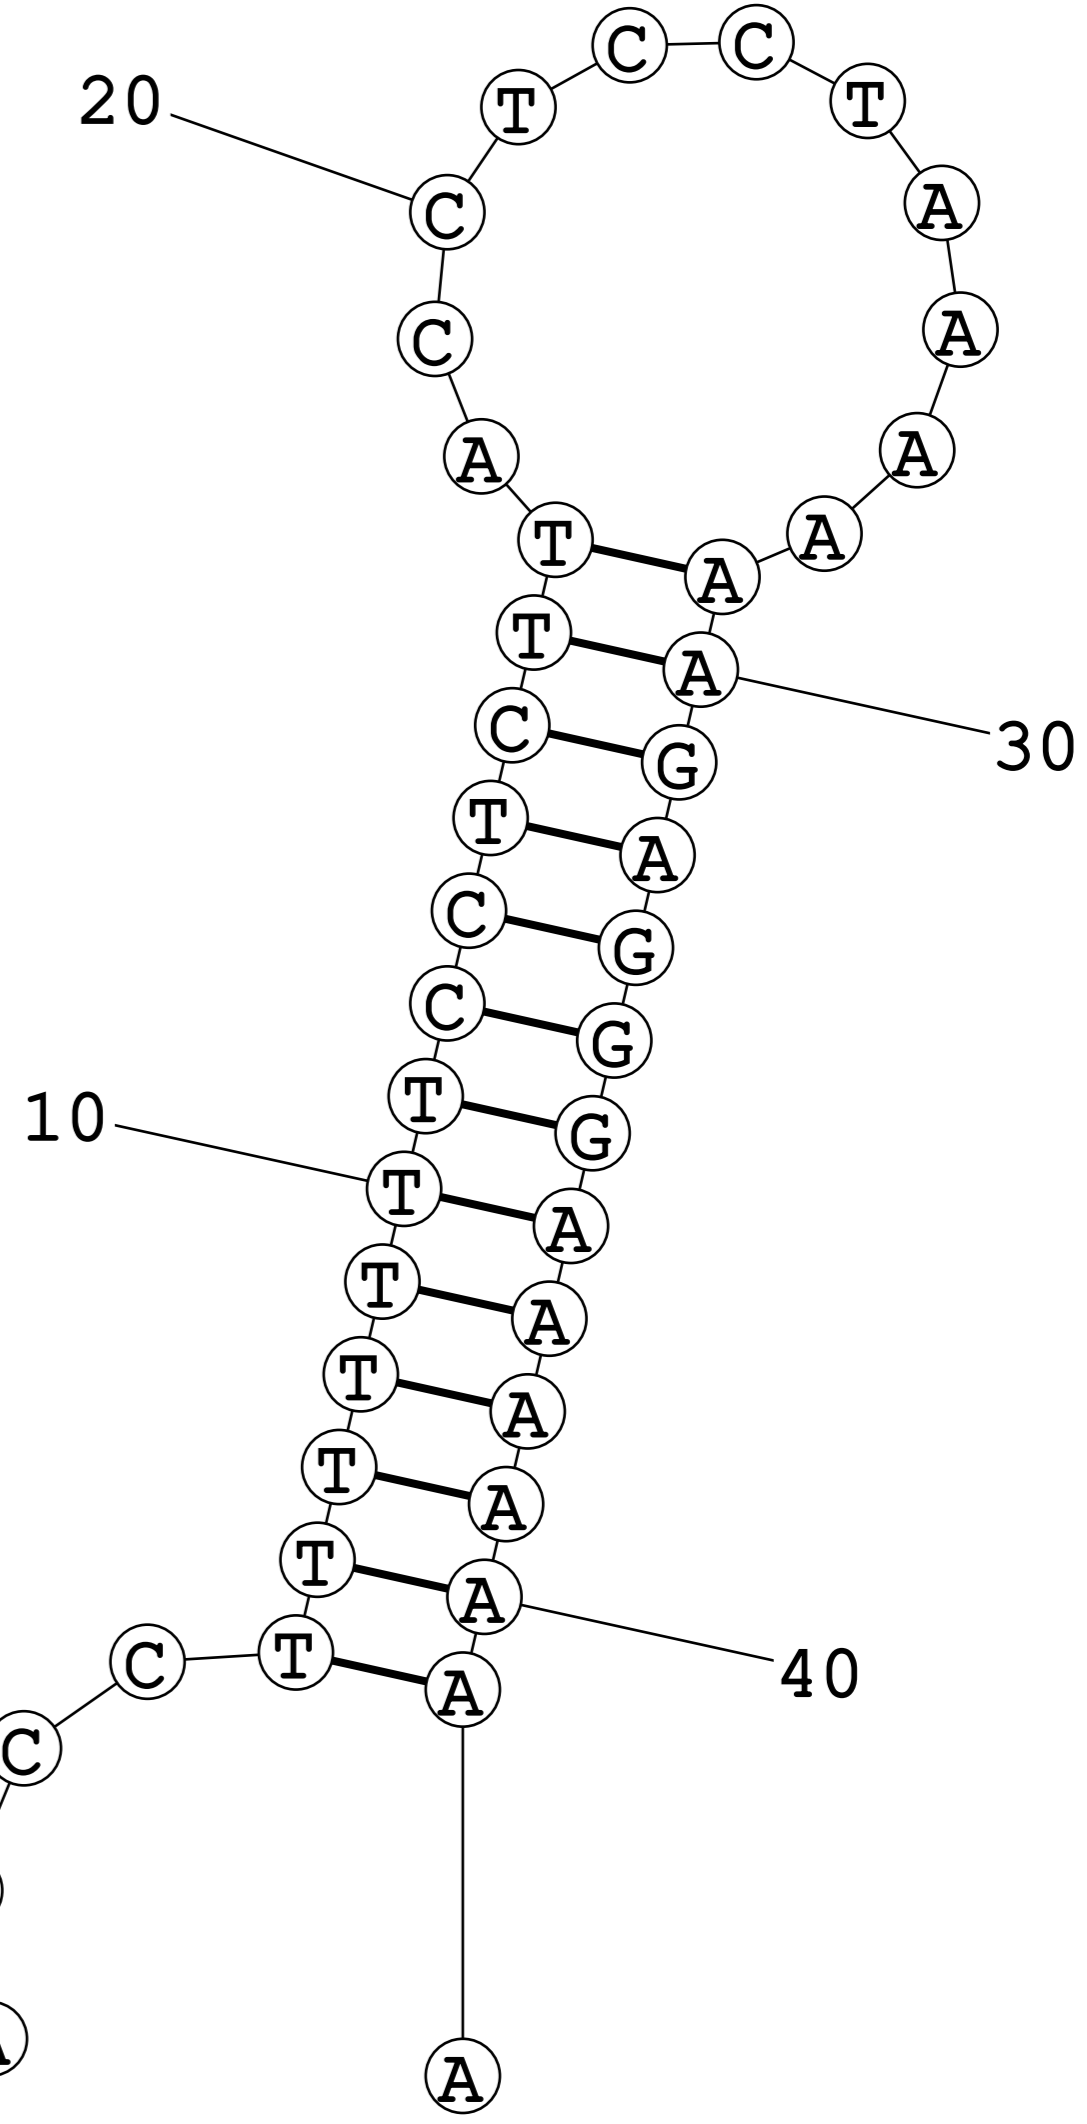

**P. *Afronurus* sp. 07BF96**

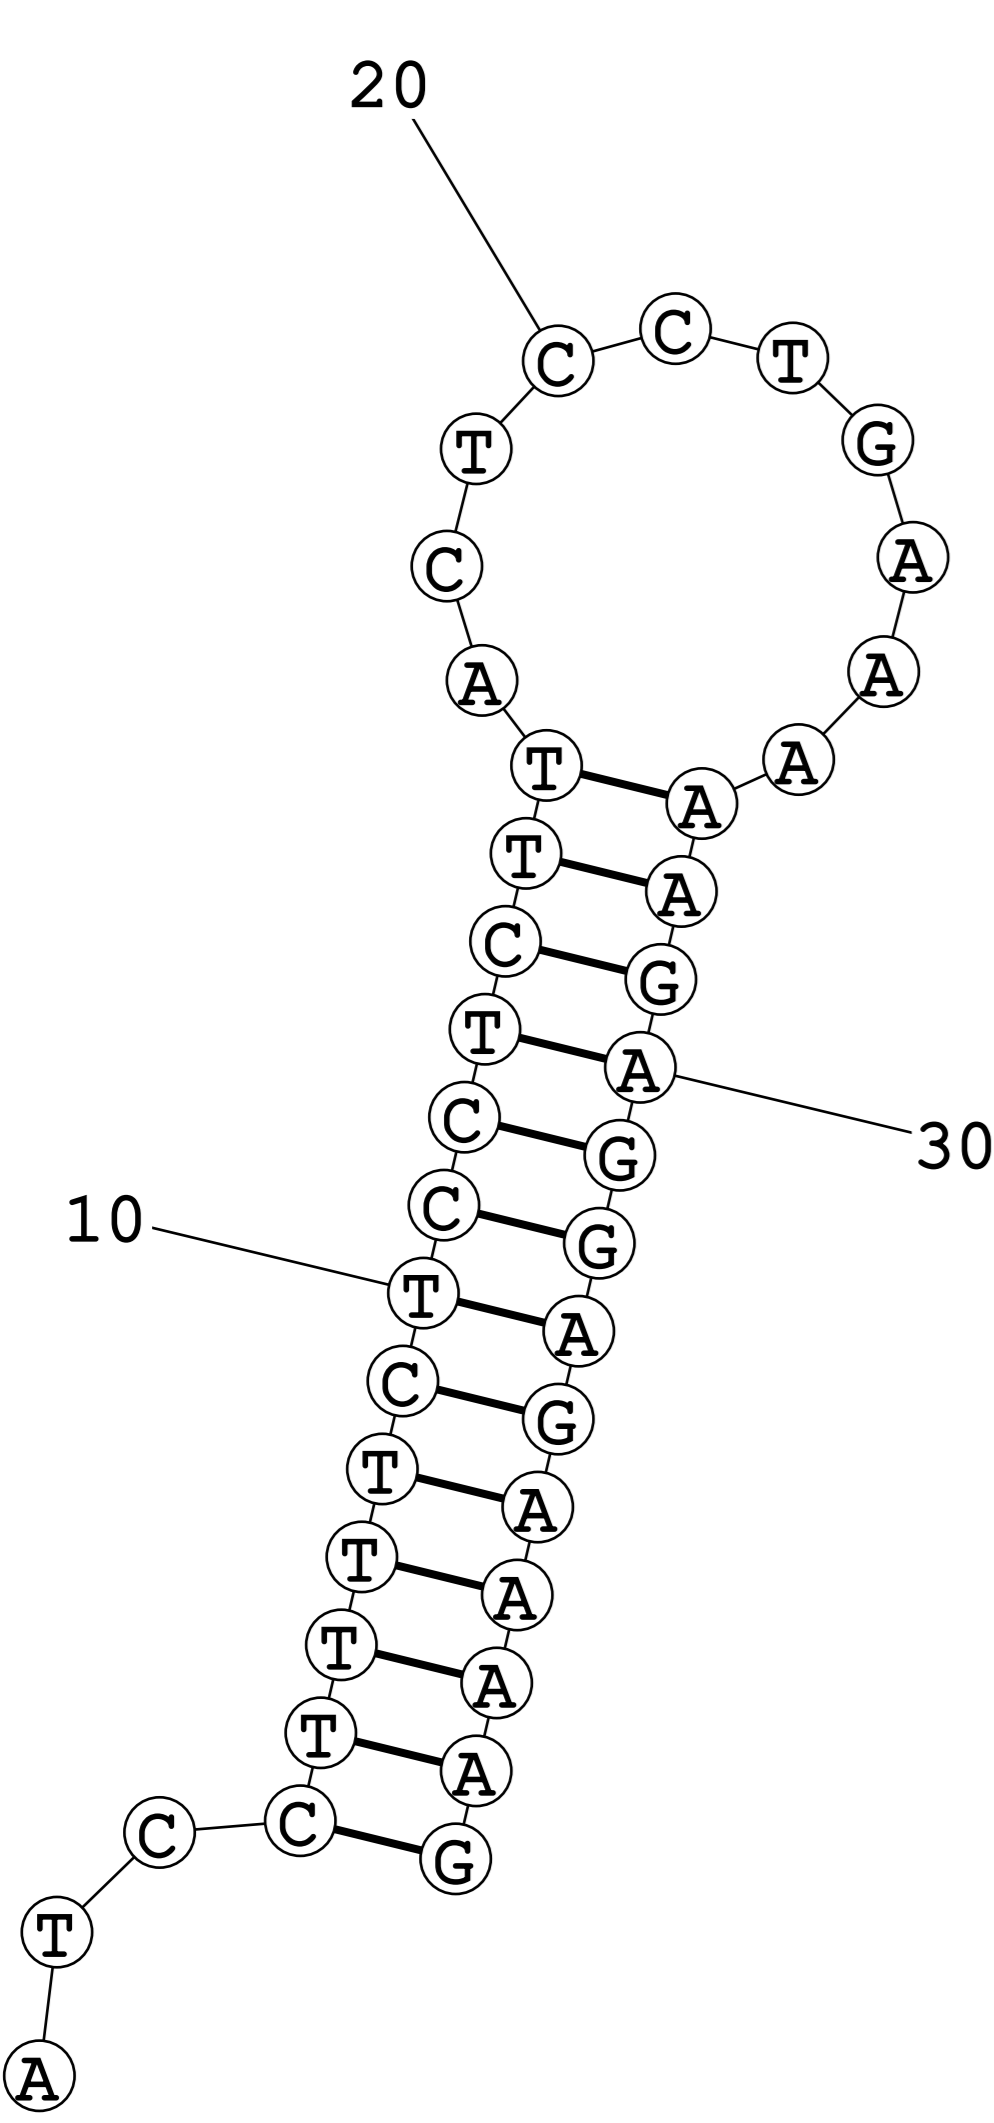

**Q. *Heptageniidae* sp. YW03BF02**

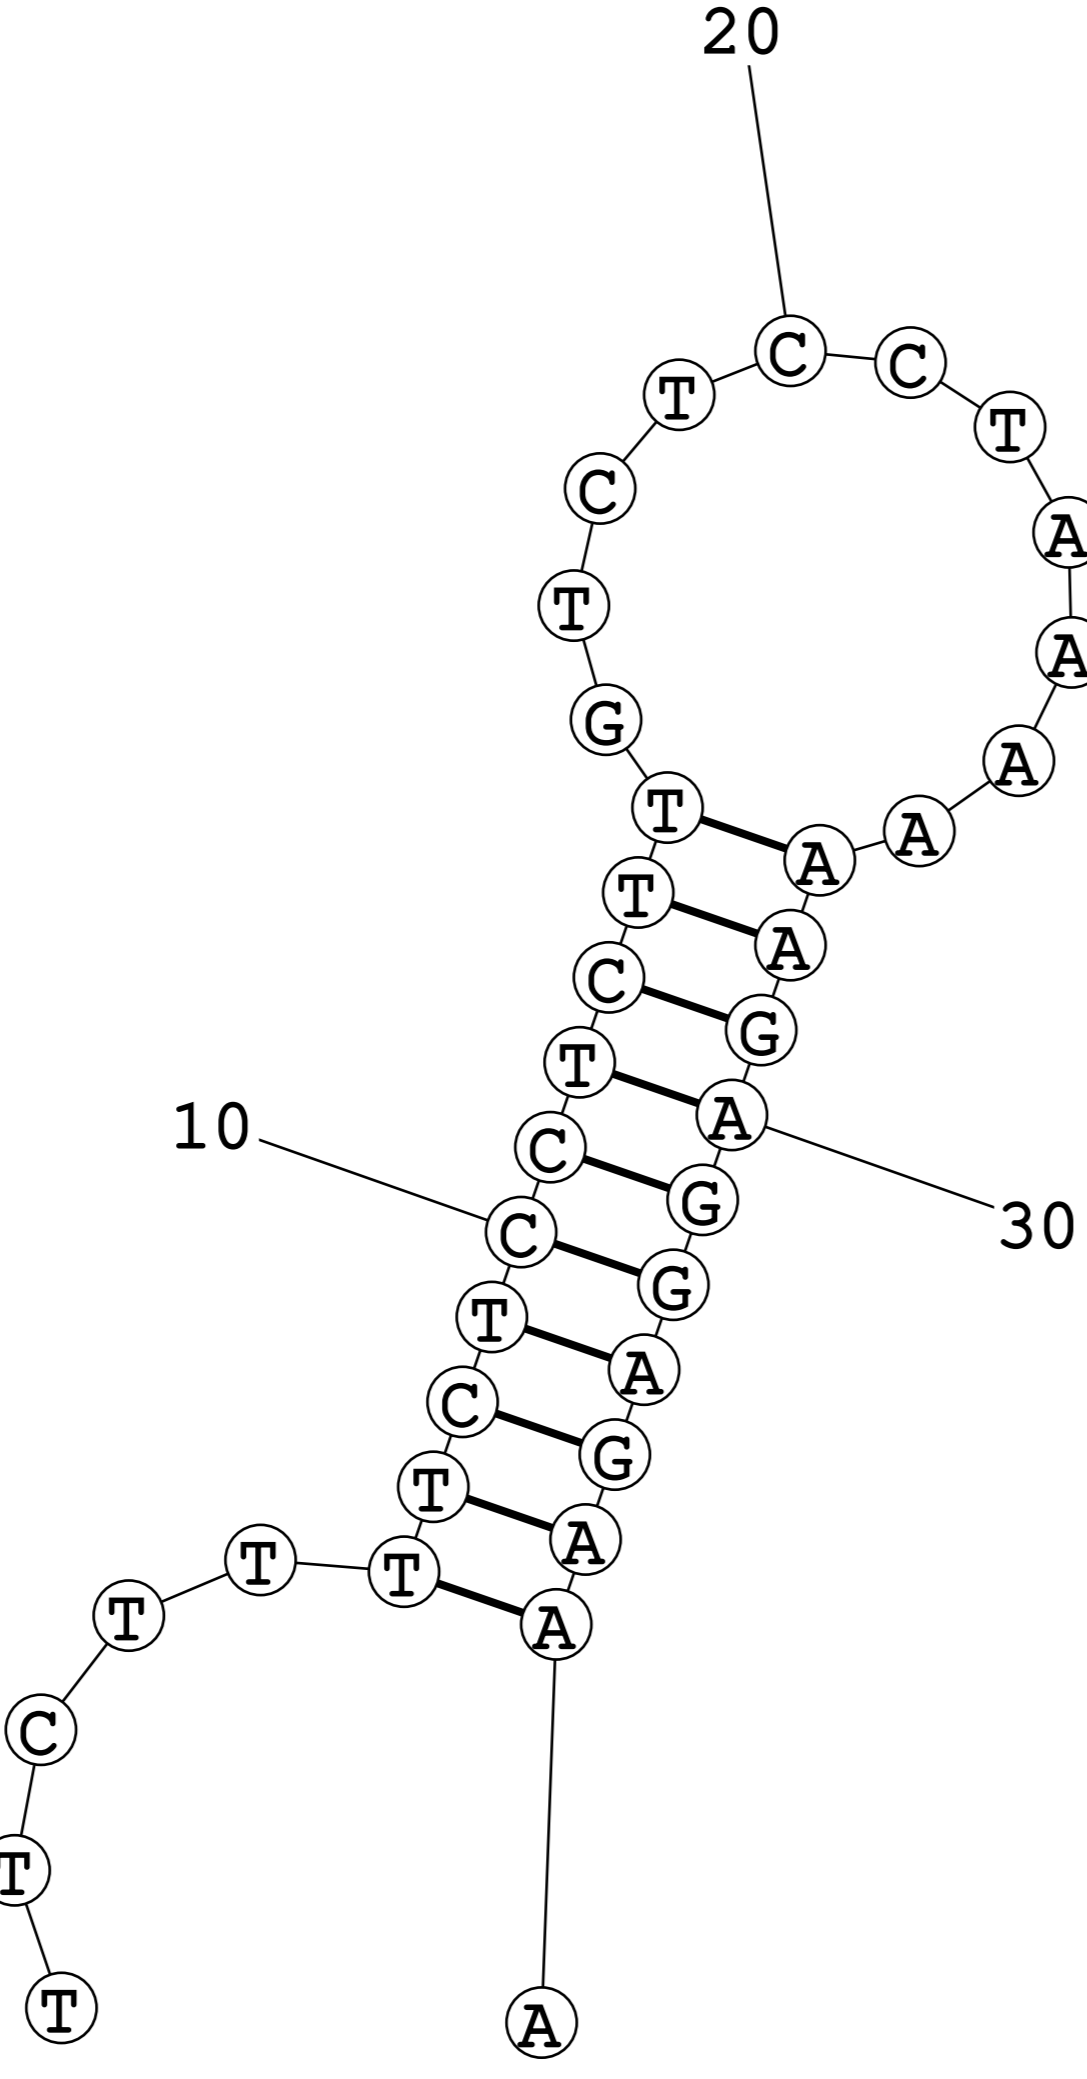

**R. *L. aphrodite***

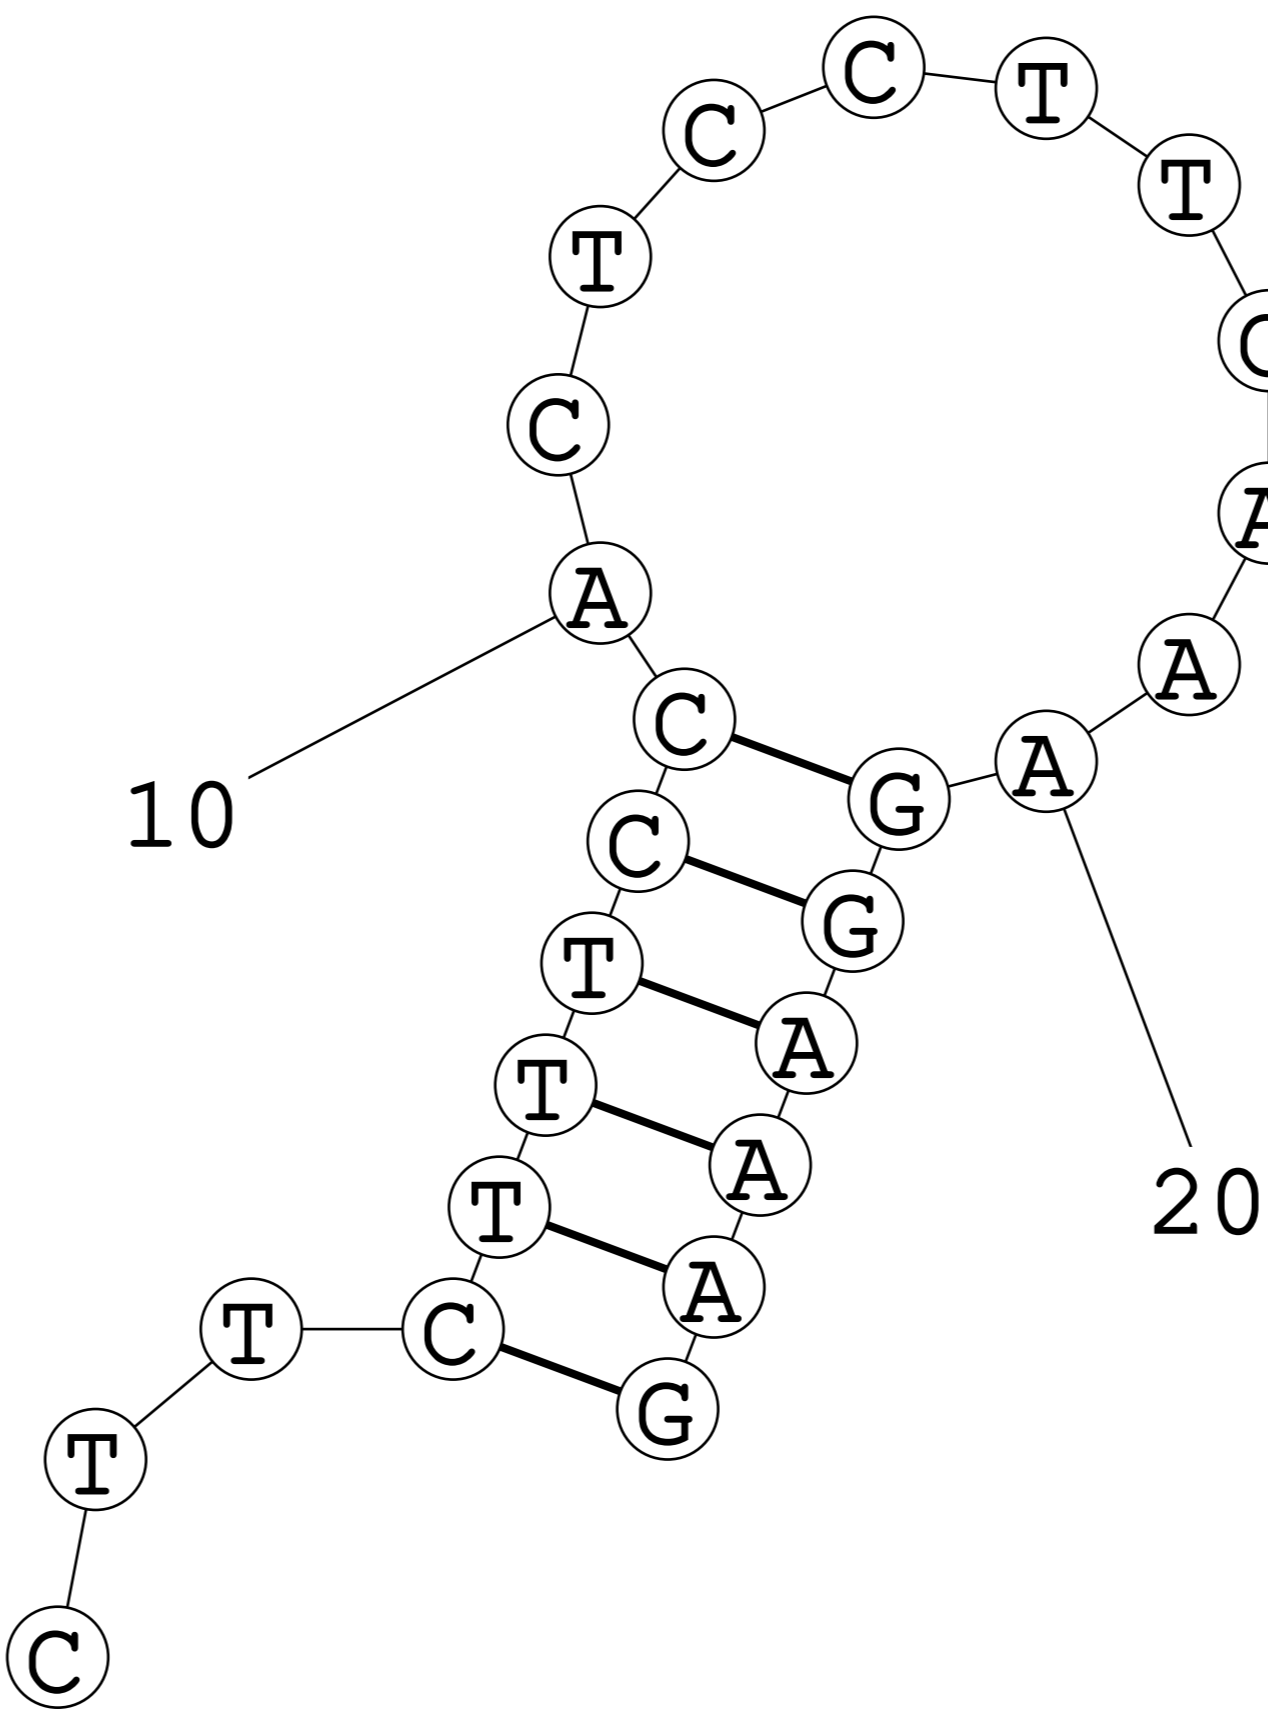

**S. *M. mediopunctatum***

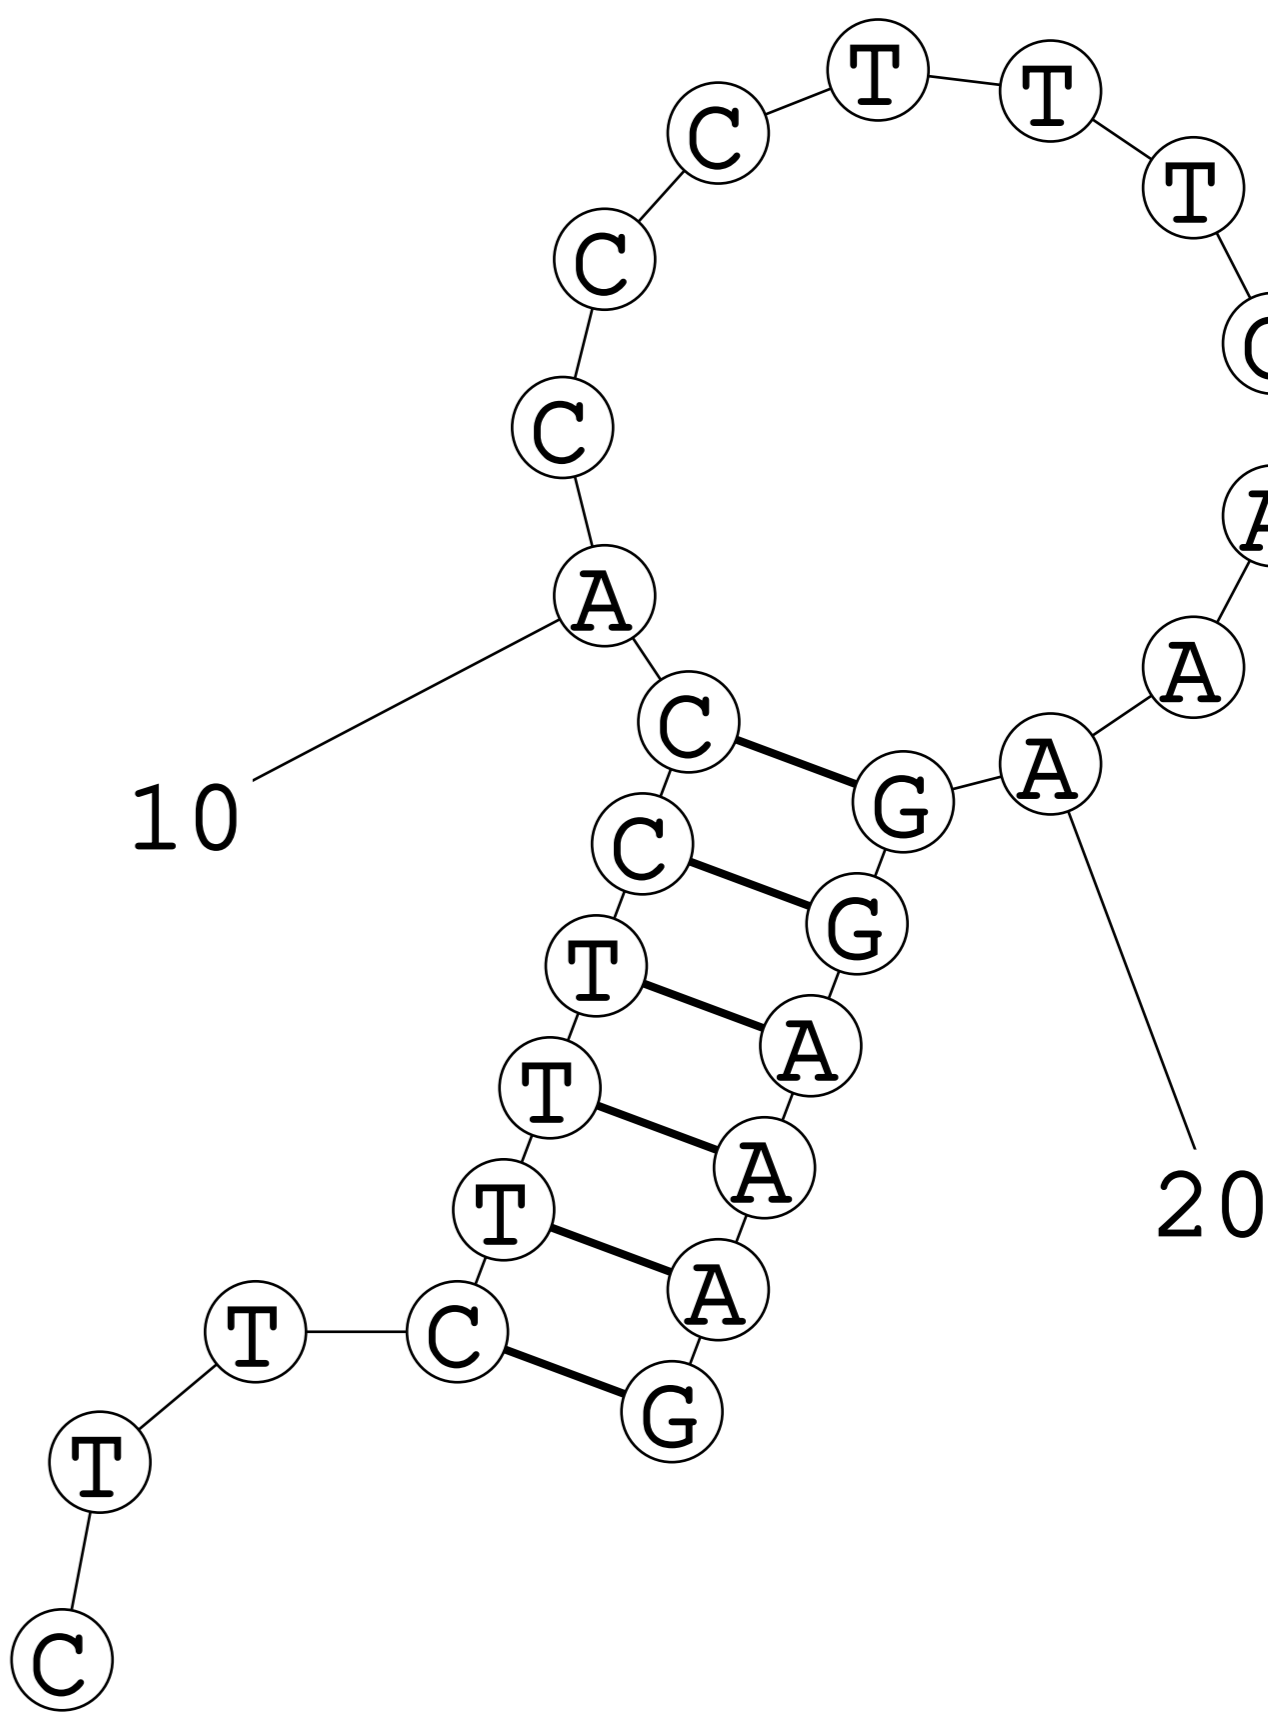

**T. *M. modestum***

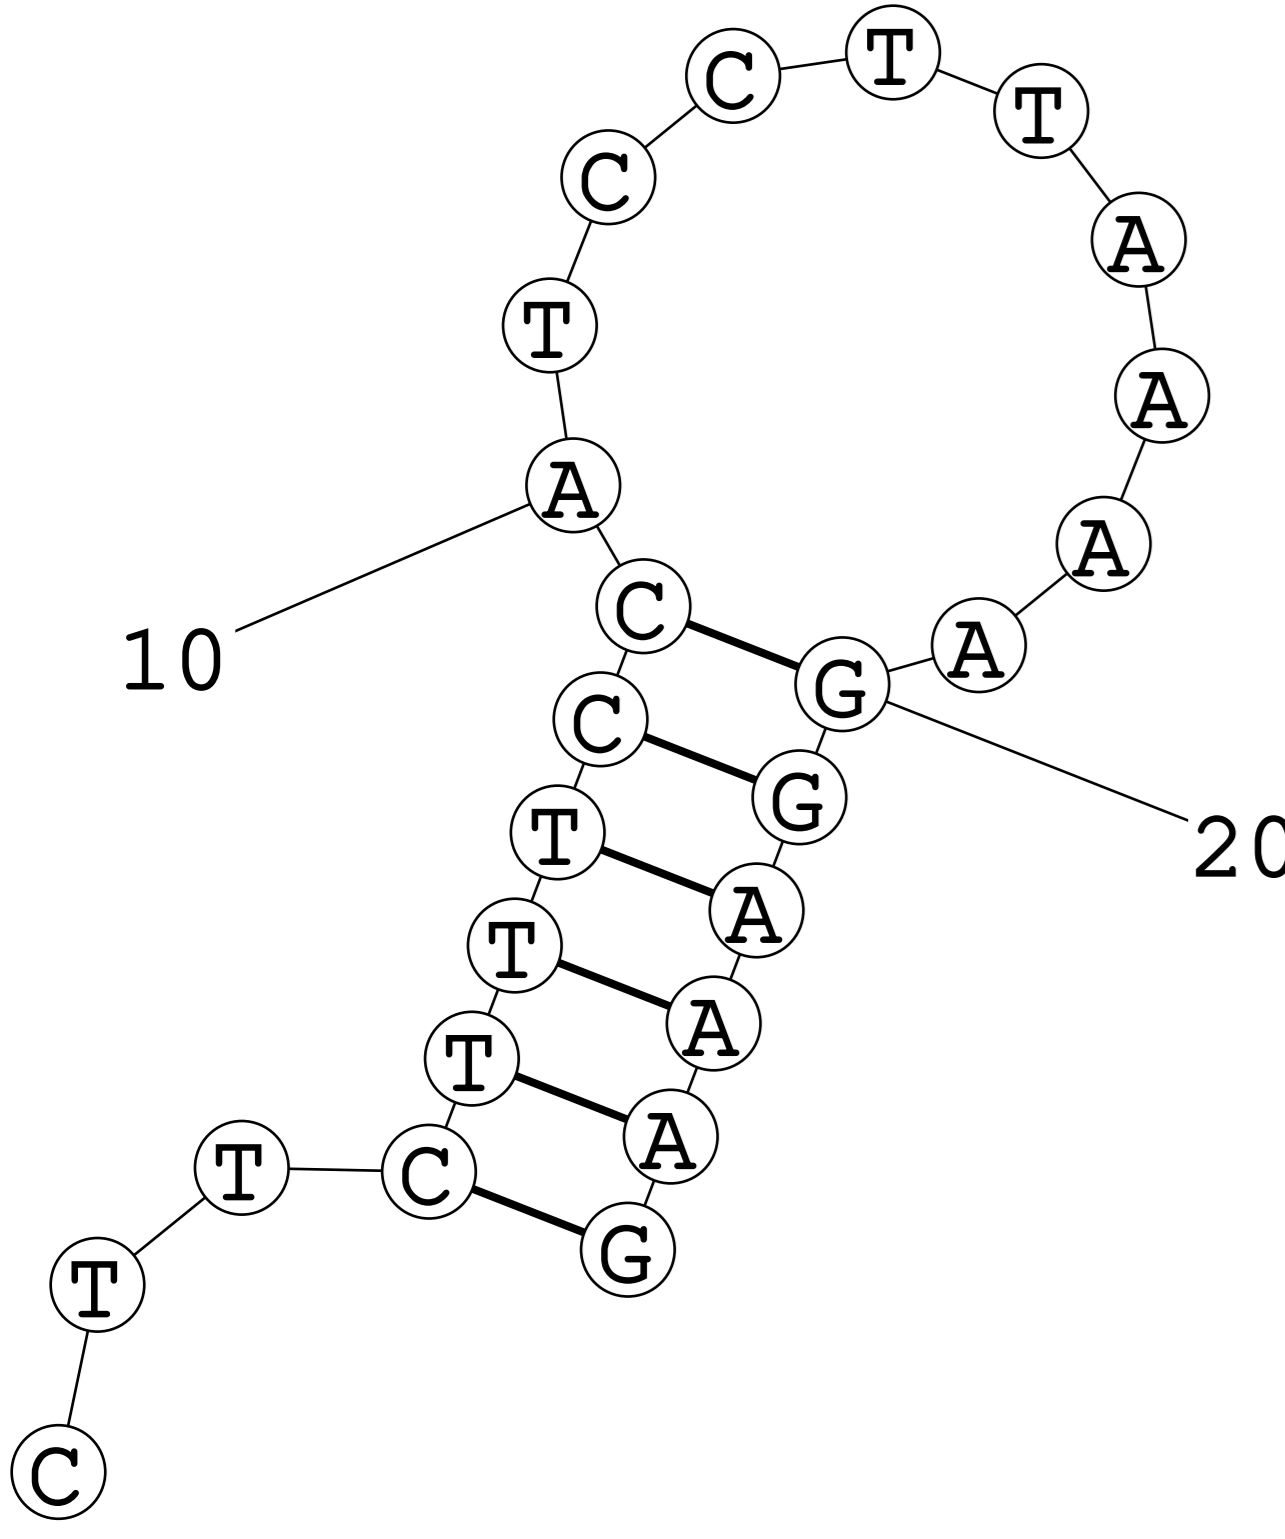

**U. *M. vicarium***

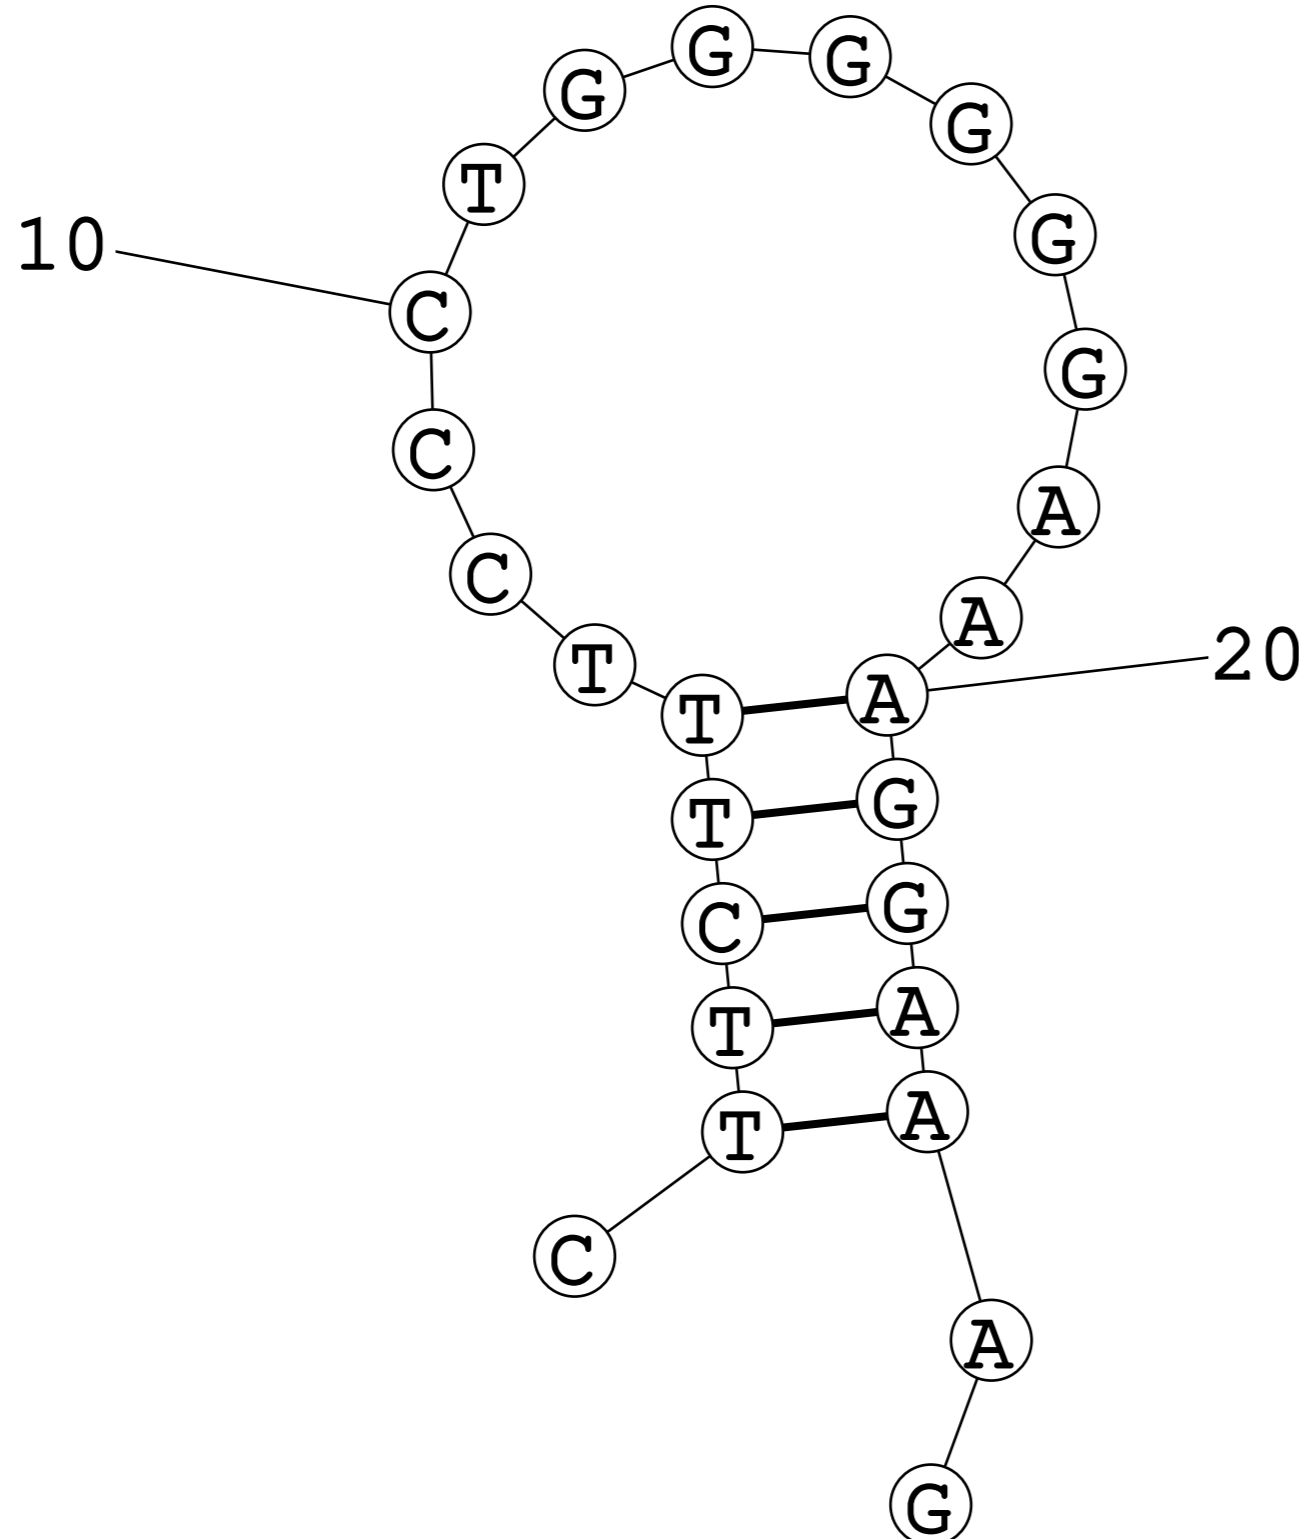

**V. *S. interpunctatum***

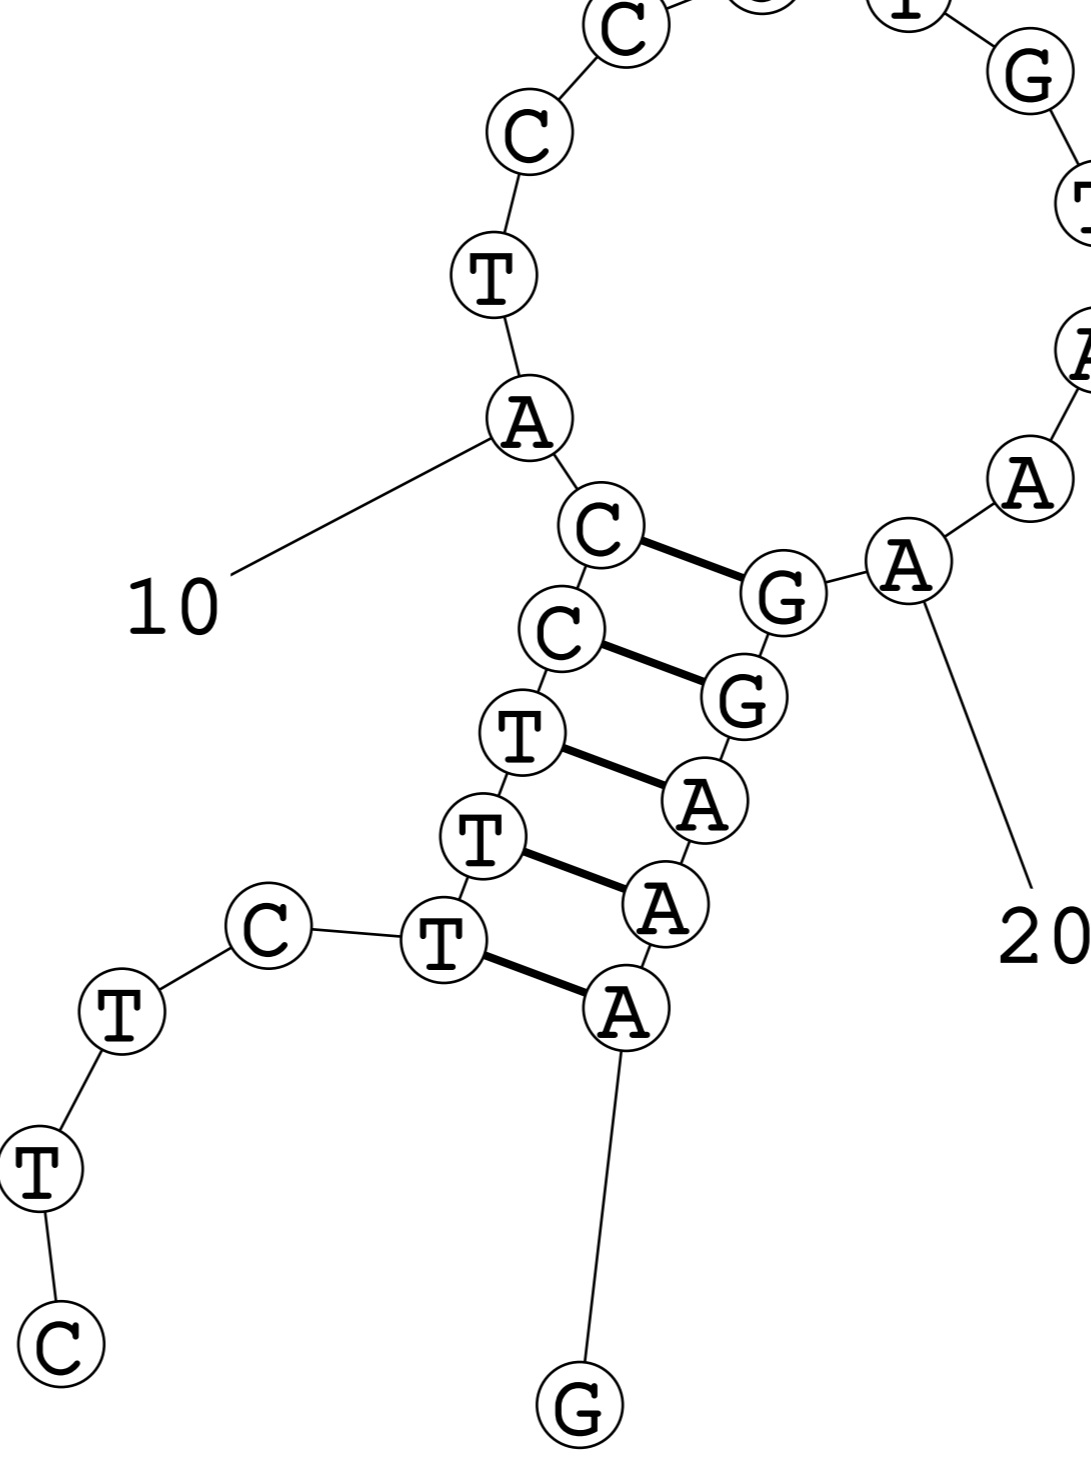

**W. *S. femoratum***

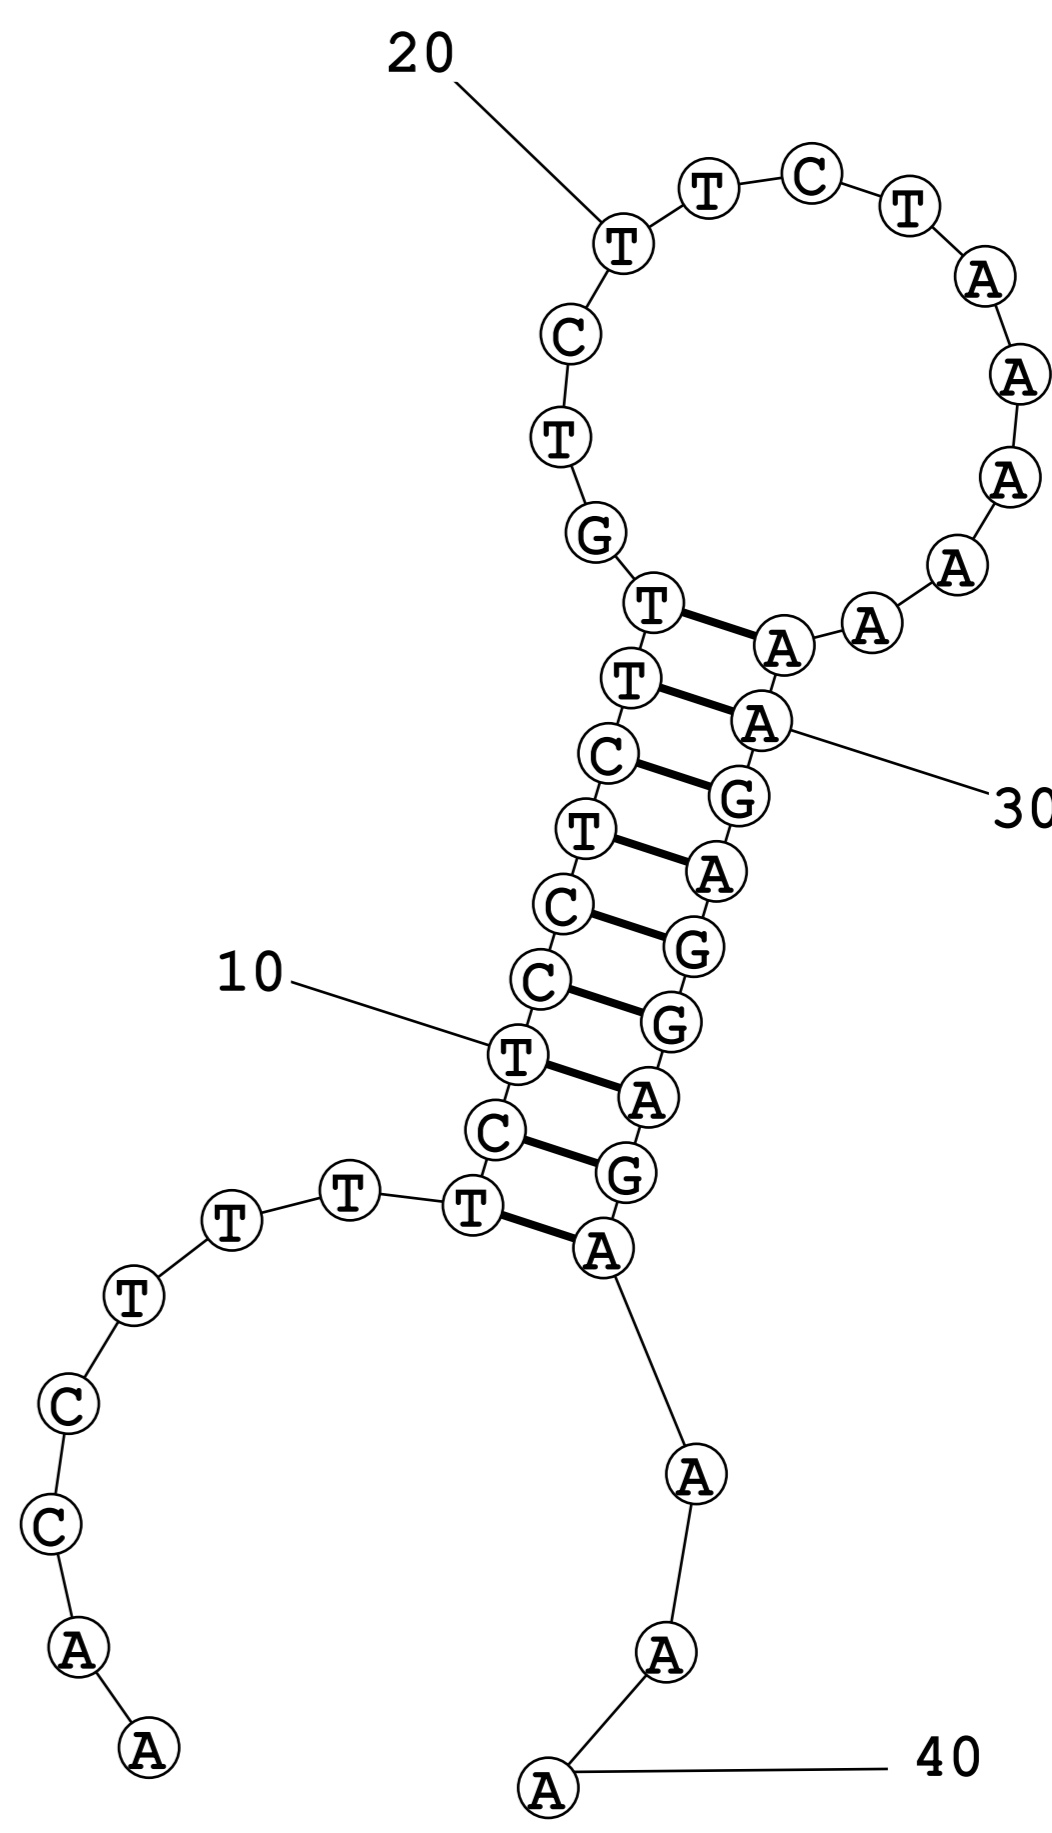

**X. *Parafronurus* sp. XL-2019**
