# Supplementary material for: Insight into the Phylogenetic Relationships among Three Subfamilies within Heptageniidae (Insecta: Ephemeroptera) along with Low-Temperature Selection Pressure Analyses Using Mitogenomes
Source: MDPI journal article supplement (doi:10.3390/insects12070656), 2021-07-19
Supplement: s1 [file s1]

|              |   |                                                               |
|--------------|---|---------------------------------------------------------------|
| <i>trnM1</i> | 1 | GGAGAGGTAAGCTAAGGT--AAGCTAACAGGTTTCATACCCTGTCTATGGAGAATACTCCC |
| <i>trnM2</i> | 1 | AGAAAGGTAAGCTAAATTTTAAAGCTCATAGGTTTCATACCCTATTATGGT--TACTCCTC |
| consensus    | 1 | . ** . ***** . * . ***** * ***** ***** . * ***** .. * *       |

|              |    |         |
|--------------|----|---------|
| <i>trnM1</i> | 59 | CTCTCTA |
| <i>trnM2</i> | 59 | TTTCTA- |
| consensus    | 61 | * .     |

#### A. *Afromurus* sp. 07BF85

|              |   |                                                                |
|--------------|---|----------------------------------------------------------------|
| <i>trnM1</i> | 1 | GGGAAGGTAAGCTAAATT--AAGCTAACAGGTTTCATACCCTGTGTATGGAGGGTACTCCCC |
| <i>trnM2</i> | 1 | AGAAAGGTAAGCTAAATTCAAGCTCATAGGTTTCATACCCTATTATGGTA---ACTCCTC   |
| consensus    | 1 | . * . ***** . ***** * ***** ***** . * ***** . . . ***** *      |

|              |    |         |
|--------------|----|---------|
| <i>trnM1</i> | 60 | TTCTTA  |
| <i>trnM2</i> | 58 | TTTCTG  |
| consensus    | 61 | ** ** . |

#### B. *Afromurus* sp. 07BF86

|              |   |                                                               |
|--------------|---|---------------------------------------------------------------|
| <i>trnM1</i> | 1 | GGAGAGGTAAGCTAAGGT--AAGCTAACAGGTTTCATACCCTGTGTATGGAGTGTACTCCC |
| <i>trnM2</i> | 1 | AGAAAGGTAAGCTAAATTCTAAGCTCATAGGTTTCATACCCTATTATGGT---TACTCCT  |
| consensus    | 1 | . ** . ***** . * . ***** * ***** ***** . * ***** .. *****     |

|              |    |          |
|--------------|----|----------|
| <i>trnM1</i> | 59 | CTCTCTA  |
| <i>trnM2</i> | 58 | CTTTCTA  |
| consensus    | 61 | ** ***** |

#### C. *Afromurus* sp. 07BF96

|              |   |                                                              |
|--------------|---|--------------------------------------------------------------|
| <i>trnM1</i> | 1 | GGAAAGGTAAGCTAAGCTAAGCTAACAGGTTTCATACCCTGTGTATGGAGACTACTCCCC |
| <i>trnM2</i> | 1 | AGAAAGGTAAGCTAAACTAAGCTCATAGGTTTCATACCCTATTATGGATACT-CTCCTC  |
| consensus    | 1 | . ***** . ***** * ***** ***** . * ***** *** . ***** *        |

|              |    |         |
|--------------|----|---------|
| <i>trnM1</i> | 61 | TCTCTA  |
| <i>trnM2</i> | 60 | TTTCTA  |
| consensus    | 61 | * ***** |

#### D. *A. furcata*

|              |   |                                                              |
|--------------|---|--------------------------------------------------------------|
| <i>trnM1</i> | 1 | GGAAAGGTAAGCTAAGCTAAGCTAACAGGTTTCATACCCTGTGTATGGAGACTACTCCCC |
| <i>trnM2</i> | 1 | AGAAAGGTAAGCTAAACTAAGCTCATAGGTTTCATACCCTATTATGGATACT-CTCCTC  |
| consensus    | 1 | . ***** . ***** * ***** ***** . * ***** *** . ***** *        |

|              |    |         |
|--------------|----|---------|
| <i>trnM1</i> | 61 | TCTCTA  |
| <i>trnM2</i> | 60 | TTTCTA  |
| consensus    | 61 | * ***** |

#### E. *A. rubromaculata*

|              |   |                                                               |
|--------------|---|---------------------------------------------------------------|
| <i>trnM1</i> | 1 | GGAGAGGTAAGCTAAGA-TTAAGCTAATAGGTTTCATACCCTATGTATGGAGATTCTCCC  |
| <i>trnM2</i> | 1 | AGAAAGATAAGCTAAGTCTTAAGCTAATAGGTTTCATACCCTATCTATGG---TTACCCCT |
| consensus    | 1 | . ** . ** . ***** . ***** ***** ***** ***** . . . ** * **     |

|              |    |          |
|--------------|----|----------|
| <i>trnM1</i> | 60 | CTCTCTA  |
| <i>trnM2</i> | 58 | CTTTCTA  |
| consensus    | 61 | ** ***** |

#### F. *Afromurus* sp1. YW01BF06

|              |    |        |
|--------------|----|--------|
| <i>trnM1</i> | 61 | TTTCTA |
| <i>trnM2</i> | 59 | TTTCTA |
| consensus    | 61 | *****  |

*trnM1* 1 GAACAGATAAGCTAAAGTT--AAGCTAATAGGTCATACCCTATGTATGGAGACTACTCC  
*trnM2* 1 AGAAAGTAAGCTAAGTTC CCAAGCTCATAGGTCATACCCTATTATGGTTA--ATCC  
consensus 1 .\*.\*\*.\*\*\*\*\*.\* \*\*\*\*\* \*\*\*\* \* \*\* \*

|              |    |           |
|--------------|----|-----------|
| <i>trnM1</i> | 59 | TCTCTTTA  |
| <i>trnM2</i> | 59 | TCTTTC TA |
| consensus    | 61 | *** * **  |

|              |   |                                                              |
|--------------|---|--------------------------------------------------------------|
| <i>trnM1</i> | 1 | AGGAAGATAAGCTAAGTATAAGCTCGTAGGTTCATACCCATTTTATGGAGATTGCTCCTC |
| <i>trnM2</i> | 1 | GGGAAGATAAGCTAAGTATAAGCTCGTAGGTTCATACCCATTTTATGGAGATTGCTCCTC |
| consensus    | 1 | .*****                                                       |

|              |    |        |   |
|--------------|----|--------|---|
| <i>trnM1</i> | 61 | TTTCTA |   |
| <i>trnM2</i> | 61 | TTTCCA |   |
| consensus    | 61 | *****  | * |

*trnM1* 1 GGAAAGATAAGCTAATTGTAAGCTTATAGGTTTCATACCCTGTCTATGGAGAATACTCCTC  
*trnM2* 1 AAAGAAATAAGCTAAGTCTAAGCTAGTAGGCTCATACCCTAACATATGGTTCCAACCTTTC  
consensus 1 . \* \* \* \* \* \* \* \* \* \* \* \* \* \* \* \* \* \* \* \* \* \*

|              |    |        |
|--------------|----|--------|
| <i>trnM1</i> | 61 | TTTCTA |
| <i>trnM2</i> | 61 | TTTA-- |
| consensus    | 61 | ***..  |

*trnM1* 1 GGAAAGGTAAGCTAAGTGTAAAGCTCATAGGTTTCATACCCTATTTATGGAGTCTTCTCCCTC  
*trnM2* 1 AGAAAGGTAAGCTAAGTGTAAAGCTCATAGGTTTCATACCCTATTTATGG---CATCCCTC  
 consensus 1 \*\*\*\*\*  
 . . . . . \* \* \* \* \*

|              |    |        |
|--------------|----|--------|
| <i>trnM1</i> | 61 | TTTCTA |
| <i>trnM2</i> | 58 | TTTCTA |
| consensus    | 61 | *****  |

*trnM1* 1 GGAAAGATAAGC---TAAGTTAAGCTAATAGGTTTCATACCCTATGTATGGAGATCCCTCC  
*trnM2* 1 AGTTAGCTAGGCCATTAAATTGAGCTAGTAGGGTTTATATCCTACATA--GGGTTGCTTCC  
 consensus 1 \* \*\* \* \* . . . \* \* \* \* \* \* \* \* \* \* \* \* \* \* \* \* \* \* \* \* \*

|              |    |          |
|--------------|----|----------|
| <i>trnM1</i> | 58 | TCTTTCTA |
| <i>trnM2</i> | 59 | TCTTTCTA |
| consensus    | 61 | *****    |

L. *L. aphrodite*
