# Supplementary material for: Insight into the Phylogenetic Relationships among Three Subfamilies within Heptageniidae (Insecta: Ephemeroptera) along with Low-Temperature Selection Pressure Analyses Using Mitogenomes
Source: MDPI journal article supplement (doi:10.3390/insects12070656), 2021-07-19
Supplement: s1 [file s1]

**Table S2.** The partition schemes and best-fit models selected

| Nucleotide sequence alignments |                                                                         |            |
|--------------------------------|-------------------------------------------------------------------------|------------|
| Subset                         | Subset partitions                                                       | Best model |
| Partition 1                    | <i>COX2_codon1, COX3_codon1, ATP6_codon1, Cyt b_codon1</i>              | GTR+I+G    |
| Partition 2                    | <i>COX1_codon2, COX2_codon2, ATP6_codon2, COX3_codon2, Cyt b_codon2</i> | GTR+I+G    |
| Partition 3                    | <i>COX3_codon3, ND3_codon3, ND6_codon3, ATP6_codon3, ATP8_codon3</i>    | TRN+I+G    |
| Partition 4                    | <i>ATP8_codon1, ND6_codon1, ND2_codon1</i>                              | GTR+I+G    |
| Partition 5                    | <i>ATP8_codon2, ND3_codon2, ND2_codon2, ND6_codon2</i>                  | GTR+G      |
| Partition 6                    | <i>COX1_codon1</i>                                                      | GTR+I+G    |
| Partition 7                    | <i>COX1_codon3</i>                                                      | HKY+I+G    |
| Partition 8                    | <i>COX2_codon3, Cyt b_codon3</i>                                        | GTR+I+G    |
| Partition 9                    | <i>ND4L_codon1, ND3_codon1, ND5_codon1, ND1_codon1, ND4_codon1</i>      | GTR+I+G    |
| Partition 10                   | <i>ND4L_codon2, ND1_codon2, ND5_codon2, ND4_codon2</i>                  | GTR+I+G    |
| Partition 11                   | <i>ND4_codon3, ND1_codon3, ND5_codon3, ND4L_codon3</i>                  | GTR+I+G    |
| Partition 12                   | <i>ND2_codon3</i>                                                       | TIM+G      |
