# Supplementary material for: Insight into the Phylogenetic Relationships among Three Subfamilies within Heptageniidae (Insecta: Ephemeroptera) along with Low-Temperature Selection Pressure Analyses Using Mitogenomes
Source: MDPI journal article supplement (doi:10.3390/insects12070656), 2021-07-19

*Afronurus* sp. 07BF85

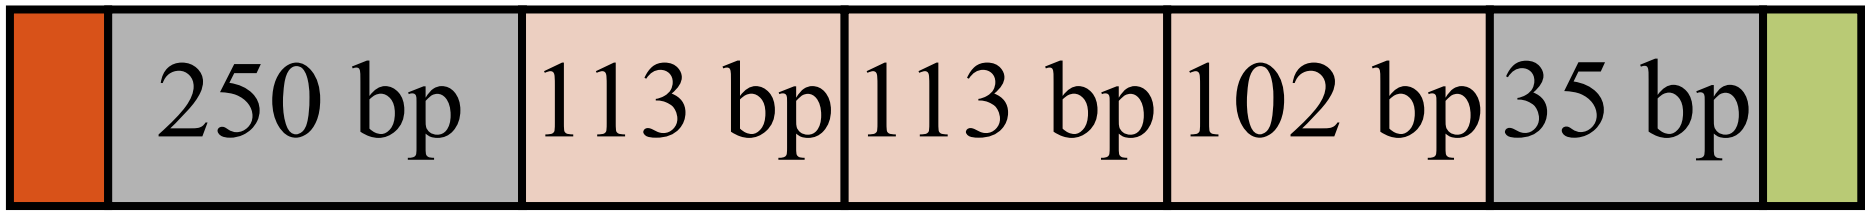

*Afronurus* sp. 07BF86

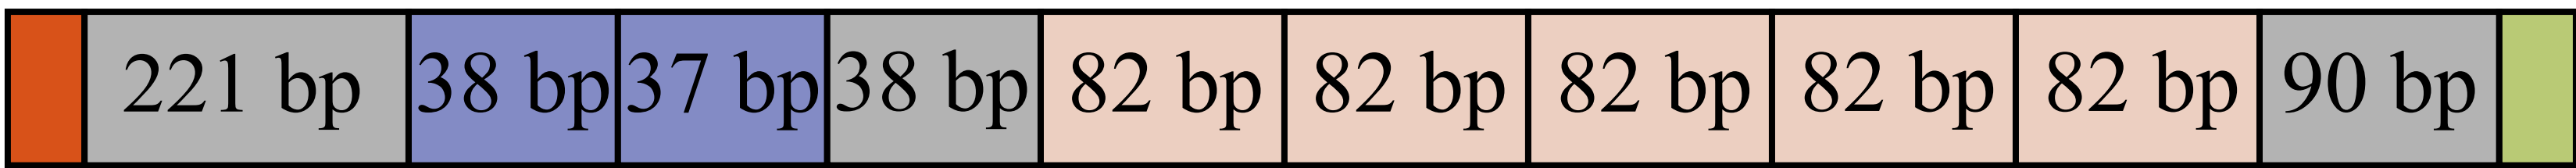

*A. furcate*

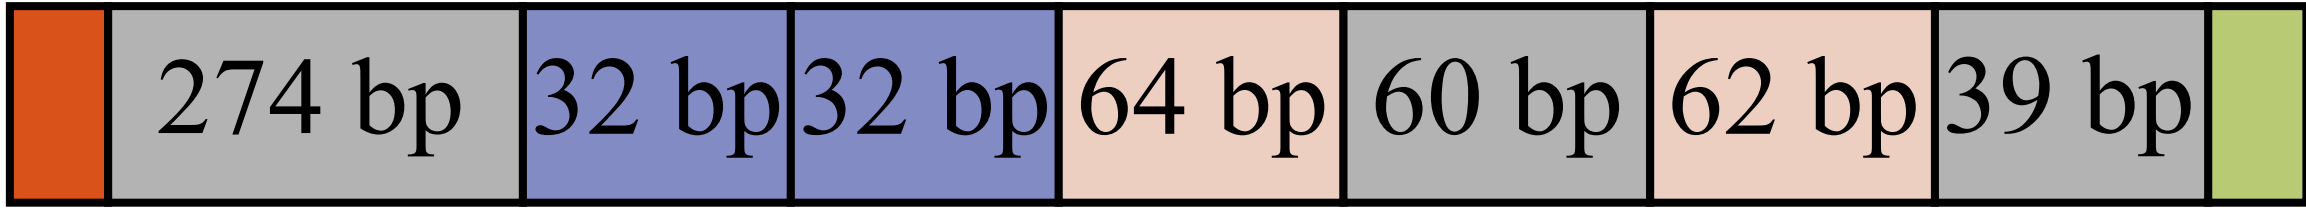

*A. rubromaculata*

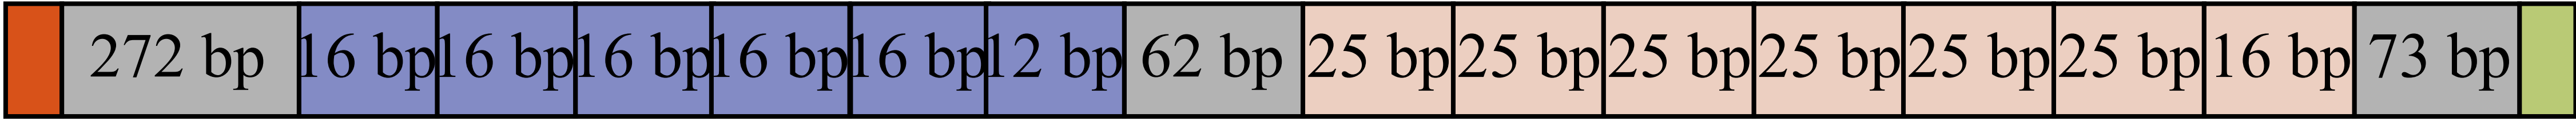

*Afronurus* sp2. LS53BF04

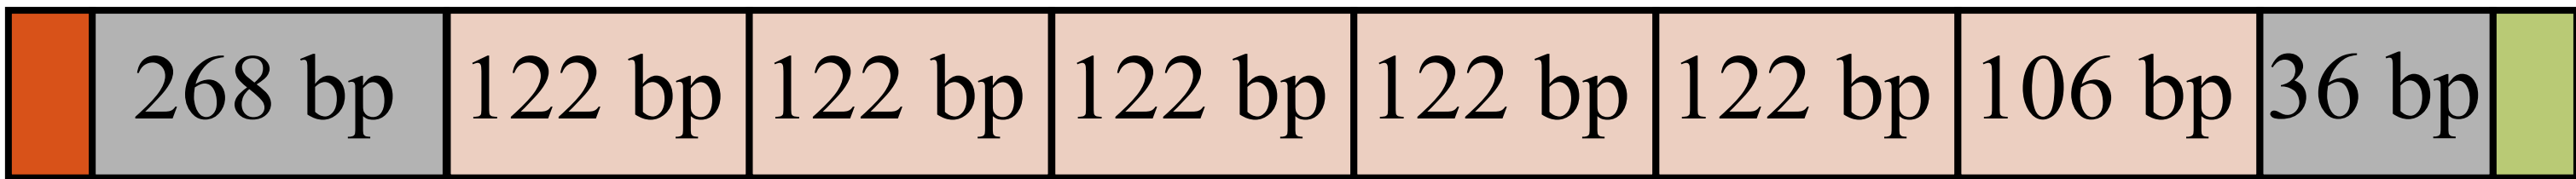

*A. yixingensis*

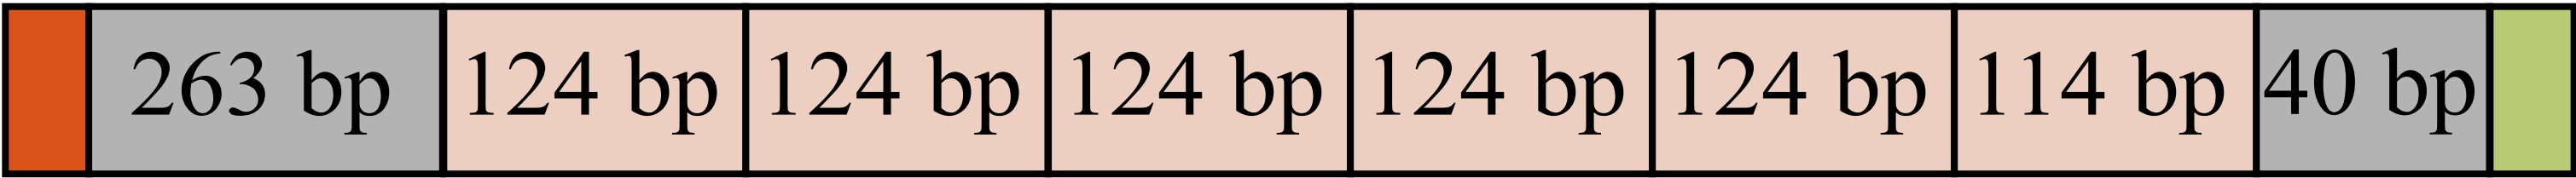

Heptageniidae sp. YW03BF02

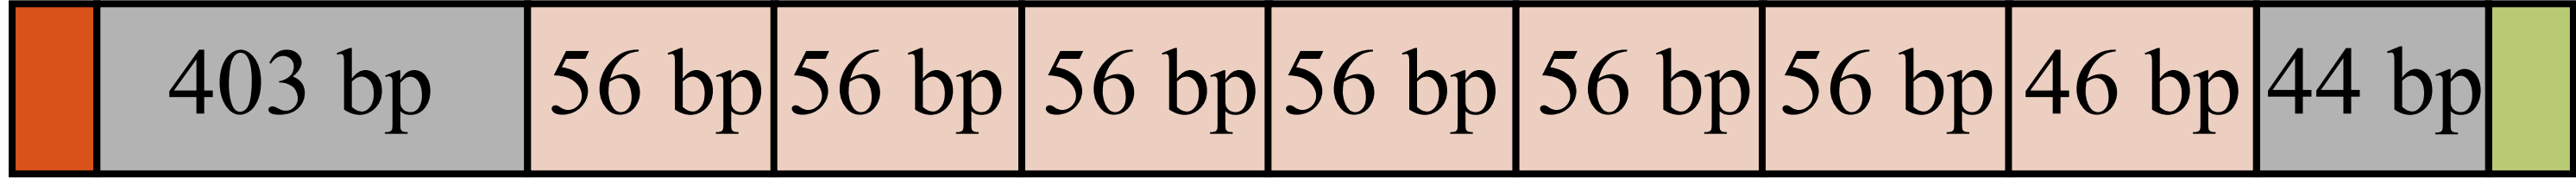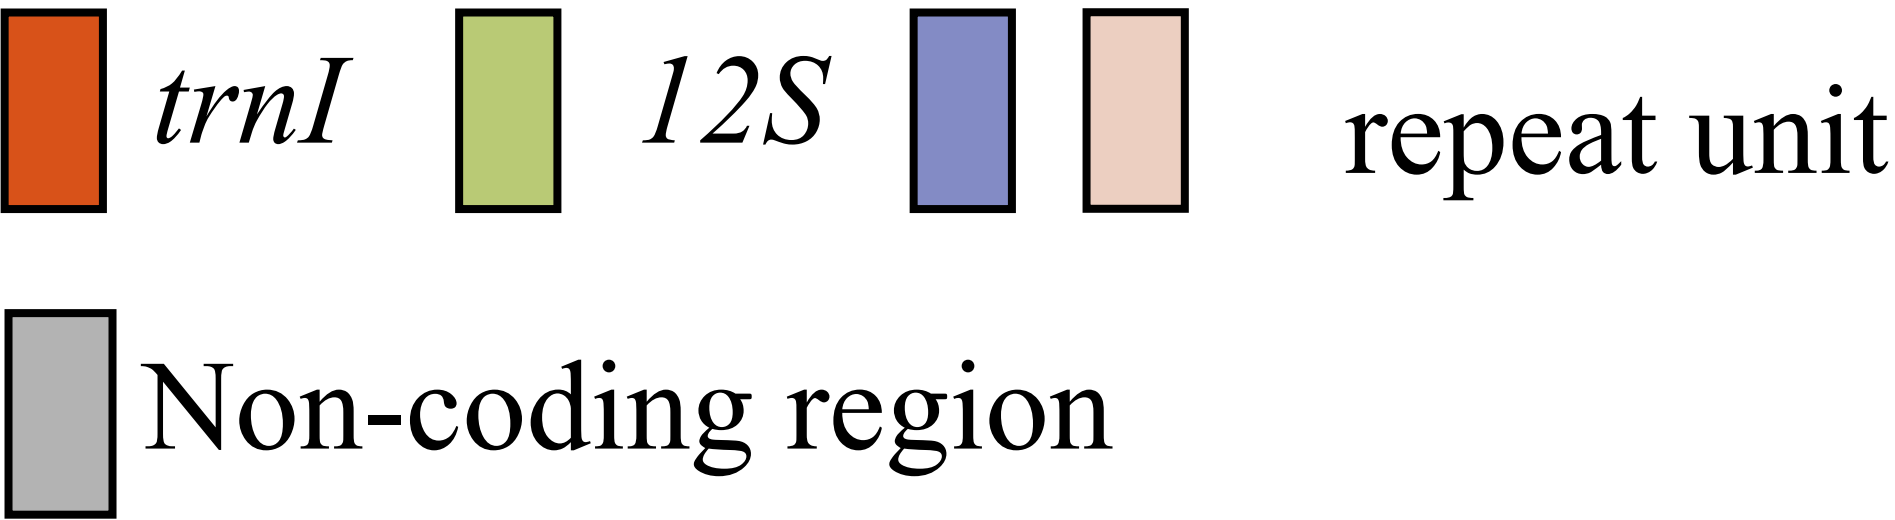

Supplement: s1 [file s1]
