# Supplementary material for: Insight into the Phylogenetic Relationships among Three Subfamilies within Heptageniidae (Insecta: Ephemeroptera) along with Low-Temperature Selection Pressure Analyses Using Mitogenomes
Source: MDPI journal article supplement (doi:10.3390/insects12070656), 2021-07-19
Supplement: s1 [file s1]

**Table S1.** Specific primers used to amplify the Heptageniidae mitochondrial genomes.

| Species                  | Primer Name    | Sequence (5'-3')      | Product length (nt) |
|--------------------------|----------------|-----------------------|---------------------|
| <i>M. modestum</i>       | 03FY62-J-2318  | TATTCTGATTCTTCGGACA   | 2400                |
|                          | 03FY62-N-4600  | AGAAGAGTTAGTGACAGGCT  |                     |
|                          | 03FY62-J-5600  | TCTCTTCAAACAGGTAATG   | 3500                |
|                          | 03FY62-N-9000  | TACTGGTGGCTATTTTCTAT  |                     |
|                          | 03FY62-J-9300  | ATTCTGGGTTCTAAAAGTGC  | 2300                |
|                          | 03FY62-N-11600 | TAAAGGAAGTAAGTGACGGT  |                     |
|                          | 03FY62-J-14650 | CCAGATTTCATAACTTCGC   | 1000                |
|                          | 03FY62-N-286   | CTTCCTCCATCCACTACAT   |                     |
| <i>M. vicarium</i>       | 03FY39-J-3228  | CTTGATGAAGTAAGCGACC   | 1500                |
|                          | 03FY39-N-5226  | GTGTTCAAAGTAATGCCGA   |                     |
|                          | 03FY39-J-5184  | CTATCGCAGATGCTGTGTA   | 3300                |
|                          | 03FY39-N-8502  | TAGGGTTAGTGTAGGGGG    |                     |
|                          | 03FY39-J-8898  | TCACTAAACATCCTCCAAC   | 2500                |
|                          | 03FY39-N-11424 | CGTAGGCGAATAGGAAATA   |                     |
|                          | 03FY39-J-14579 | CCAGATTTCATAACTTCGC   | 1000                |
|                          | 03FY39-N-384   | GGCTGAGATGGTGATTAGG   |                     |
| <i>M. mediopunctatum</i> | 03FY33-J-3196  | TACACACCGCTACCTTCTTG  | 1500                |
|                          | 03FY33-N-4989  | CAGGAGACAACTGCTATGAA  |                     |
|                          | 03FY33-J-5010  | CCTATTAGTCTGCCTCCTTC  | 3500                |
|                          | 03FY33-N-8834  | TTAGTTCACCTTTGATTACCC |                     |
|                          | 03FY33-J-9012  | TAAAGGTAAAGATGCCAGTA  | 2000                |
|                          | 03FY33-N-11059 | AAAAGTGAAGTAAGGGTGG   |                     |
|                          | 03FY33-J-14217 | GCACCTTGACCTGACATCTA  | 1000                |
|                          | 03FY33-N-314   | AGGGGAATGAAGGATAAGAG  |                     |
| <i>S. interpunctatum</i> | 03FY34-J-3164  | GAGCAACTCACCTTTTCC    | 1700                |
|                          | 03FY34-N-4920  | TCGGGTAATGTCTCGTCAC   |                     |
|                          | 03FY34-J-5499  | TTGTAGATGTGGTATGGCTC  | 2000                |
|                          | 03FY34-N-7418  | TACTTTAGTTACGGCTGGG   |                     |
|                          | 03FY34-J-7351  | AACATAGTAAGTCCCGCAAT  | 2000                |
|                          | 03FY34-N-9307  | TGAGATTTTGGATTTGTGGT  |                     |
|                          | 03FY34-J-9325  | AACCACAAATCCAAAATCTC  | 1700                |
|                          | 03FY34-N-11087 | TCTACATCACTGTTTACCCCT |                     |
| <i>S. femoratum</i>      | 03FY34-J-14094 | ACCTTCCTTTCAACTTTCACC | 1000                |
|                          | 03FY34-N-277   | AAGTAACCGAGTGGGATGG   |                     |
|                          | 03FY36-J-3191  | CCTACACCCACCGATACCT   | 1400                |
|                          | 03FY36-N-4628  | TGCGAAAACATAGGATTGG   |                     |
|                          | 03FY36-J-5237  | TTATGAATACATTGAAGCCC  | 2000                |
|                          | 03FY36-N-7444  | ATAACAAAGAGAGCCCAGAT  |                     |
|                          | 03FY36-J-7466  | GGGCTCTCTTTGTTATTGC   | 1500                |
|                          | 03FY36-N-9000  | ACACTTTGCTTGCTTCGTT   |                     |
|                          | 03FY36-J-9279  | CTCAACAGAATCAACCCAA   | 2000                |
|                          | 03FY36-N-11225 | GAAGAATAGCGTAAGCGAA   |                     |

|                               |                |                        |      |
|-------------------------------|----------------|------------------------|------|
| <i>L. aphrodite</i>           | 03FY36-J-14867 | CGATTAGAACTCTCAAAAAAG  | 1000 |
|                               | 03FY36-N-344   | GAGGATGTCTCAAAGATGGG   |      |
|                               | 03FY51-J-2386  | CATCATTAGCCAGGAAAGAG   | 2500 |
|                               | 03FY51-N-5058  | CTTGGTAGGTTCTTCTCG     |      |
|                               | 03FY51-J-5500  | ATTTTGAACACTTCTCCGC    | 3000 |
|                               | 03FY51-N-8886  | TAGATTGGTTGGTGGGTGT    |      |
|                               | 03FY51-J-9006  | CAACAAAACCTCCTGCTAAA   | 2000 |
|                               | 03FY51-N-11091 | ATCCTCCTCAAACCTCACTG   |      |
|                               | 03FY51-J-14314 | TAATGTAACCCATCTCCCC    | 1000 |
| <i>A. yixingensis</i>         | 03FY51-N-402   | AAATAGCCACAAAAGTCCC    |      |
|                               | 06BF03-J-3429  | CCTCCTAGATGAAGTTAGAGAC | 3000 |
|                               | 06BF03-N-7534  | TATATGTGCTGGTGCTGTTA   |      |
|                               | 06BF03-J-7124  | ATAACAGCACCAGCACATAT   | 1800 |
|                               | 06BF03-N-8962  | ACTCTATTGGCTTCGTTACC   |      |
|                               | 06BF03-J-9276  | GGTAACGAAGCCAATAGAGT   | 2000 |
|                               | 06BF03-N-11134 | TCAGGTTGAATATGGACAGG   |      |
|                               | 06BF03-J-13571 | AATCCACCTTCCAACACTT    | 1000 |
|                               | 06BF03-N-938   | CCAACCTTAATCCTTCCATCAC |      |
| <i>A. furcata</i>             | 08BF03-J-2814  | ATGTTGTGTCTTCAGTTGGA   | 3000 |
|                               | 08BF03-N-5963  | AGGATTAAGGCAGGTTGATG   |      |
|                               | 08BF03-J-6001  | TCATCAACCTGCCTTAATCC   | 2500 |
|                               | 08BF03-N-8865  | GAGTTCTGCTGAAGTTAGGA   |      |
|                               | 08BF03-J-9521  | ACTTAACGACTGATTGGCTA   | 1600 |
|                               | 08BF03-N-11052 | AGGAAGAGGAGGTGAACTAT   |      |
|                               | 08BF03-J-14578 | CTCTTACTACTCAGGCTCAC   | 1000 |
|                               | 08BF03-N-732   | CCAAGTGGTTGATTGATGAA   |      |
|                               | 08BF02-J-3309  | CCTGAGCAGTCCCATCTTT    | 1100 |
| <i>A. rubromaculata</i>       | 08BF02-N-4492  | GTCACGGGCTTTGGTCTAC    |      |
|                               | 08BF02-J-5161  | TCTGCTGGTCATCACTTTG    | 3000 |
|                               | 08BF02-N-8533  | GGTTACGGACTTTTGCGAG    |      |
|                               | 08BF02-J-8752  | CCGTAACCTCCTAACTTCAG   | 2400 |
|                               | 08BF02-N-11543 | AGAGAACCAATGCGATAACT   |      |
|                               | 08BF02-J-14357 | CCACCTTCCAATCATTATCC   | 1500 |
|                               | 08BF02-N-391   | CTTAATCCTTCCATAACTCCAG |      |
|                               | 08BF02-J-15417 | ATGGAAAACTACGGGTCAC    | 1000 |
|                               | 08BF02-N-594   | GTGGGACCATCCTACTTGA    |      |
| <i>Afronurus</i> sp. YW01BF06 | 01BF06-J-3255  | TTGCCTTACCTTCATTACGA   | 3000 |
|                               | 01BF06-N-7464  | CGGAGGATTAGTAGTCTTGG   |      |
|                               | 01BF06-J-7592  | AGCAGCCAAGACTACTAATC   | 1400 |
|                               | 01BF06-N-8942  | GCCTGTTAGAGGTTCTATGAT  |      |
|                               | 01BF06-J-9458  | CGACTGACTAGCCATAATCA   | 1600 |
|                               | 01BF06-N-11158 | TAGAACGGAGAATAGCATAGG  |      |
|                               | 01BF06-J-14317 | ACTCTTCTAACGGCGGTATA   | 1500 |
|                               | 01BF06-N-822   | ATAAGGCTGCTAACATCCAA   |      |

|                               |                |                        |      |
|-------------------------------|----------------|------------------------|------|
| <i>Afronurus</i> sp. LS53BF04 | 01BF06-J-14178 | GCCTTATTGTAATCCATCTCC  | 1200 |
|                               | 01BF06-N-724   | AGGACTACGGACATTCTTAA   |      |
|                               | 53BF04-J-3254  | CACTTCCTTCCCTTCGTTTAC  | 3000 |
|                               | 53BF04-N-7393  | GGTGTGTTGGTTGTGTTAGCAG |      |
|                               | 53BF04-J-7322  | AGGAGTGGACCAAAGCAGAA   | 1300 |
|                               | 53BF04-N-8675  | GAGGTTATGGACTTTTGCGA   |      |
|                               | 53BF04-J-9128  | TATGAACCAGGTGTCAACTC   | 2000 |
|                               | 53BF04-N-11056 | AGGAAGAGGAGGTGAACTAT   |      |
|                               | 53BF04-J-14787 | GACATCTCGGAACTCTTGAA   | 1200 |
|                               | 53BF04-N-158   | GAGCAGGATTCTAGGATCATT  |      |
|                               | 53BF04-J-14275 | AATCCACCTTCCAACCATT    | 1500 |
|                               | 53BF04-N-650   | TAGTGTACGAAGCACAAGAG   |      |
| <i>E. dayongensis</i>         | 18BF01-J-3105  | AAGCAAGTAGTGGTCTCTTA   | 1100 |
|                               | 18BF01-N-4287  | GTAACAATGTAGGTGTGGAG   |      |
|                               | 18BF01-J-3352  | GTTAGACGAAGTTAGAGATCCT | 1600 |
|                               | 18BF01-N-4955  | AACAATGTAGGTGTGGAGAC   |      |
|                               | 18BF01-J-5270  | CCATCCTACAAGCCTATGAA   | 2000 |
|                               | 18BF01-N-7368  | ATTGAGGGAAGTGGAGTAAC   |      |
|                               | 18BF01-J-7544  | ACAGCCTACTAATCCTATTTCC | 1500 |
|                               | 18BF01-N-9105  | GTATCAACCTGAACGAGTCC   |      |
|                               | 18BF01-J-9279  | GTAAGTATTGGCTTGCTATA   | 1900 |
|                               | 18BF01-N-11255 | ATTCTGGTTGGATATGAACG   |      |
|                               | 18BF01-J-14264 | ACCTTGACCTGACATCTTTC   | 1000 |
|                               | 18BF01-N-486   | GGCTTAGAGTTACTACACCAA  |      |
|                               | 18BF01-J-14101 | ACGACCTCATTCCAGTGTA    | 1000 |
|                               | 18BF01-N-423   | CAATCAAGACCTTCCATAACTC |      |
| <i>Epeorus</i> sp. LA03FY06   | 03FY06-J-3423  | TACATAATCCCCACCCA      | 1200 |
|                               | 03FY06-N-4630  | AATAGCAACAGCAGACTCA    |      |
|                               | 03FY06-J-5294  | TGCTGTTTACGGCTCTAC     | 2000 |
|                               | 03FY06-N-7423  | TTCCTTTTCTGCTTGGT      |      |
|                               | 03FY06-J-8102  | TAAGAGGTCTAAACCGAAT    | 9000 |
|                               | 03FY06-N-9008  | TTTTATACATTGTTAGCATC   |      |
|                               | 03FY06-J-9007  | CAATAAAGGTAAAGATGCTAA  | 1900 |
|                               | 03FY06-10908   | AAAATCGGGTAAGAGTAGC    |      |
|                               | 03FY06-13591   | TAGATACCTTGAGGACCGAT   | 1500 |
|                               | 03FY06-522     | TGCCAGTTTGAGGATAGAGT   |      |
|                               | 03FY06-J-14184 | GCACCTTGACCTGACATACT   | 1000 |
|                               | 03FY06-N-1059  | TAAAGTAGCCGAGGCAAAC    |      |
| Heptageniidae sp. YW03BF02    | 03BF02-J-3546  | ACCTCCTAGACGAAGTAAGA   | 1100 |
|                               | 03BF02-N-4658  | AATCATTGAACGAGTCCTCT   |      |
|                               | 03BF02-J-5547  | GTAGATGTAGTGTGGTTATTCC | 3000 |
|                               | 03BF02-N-8791  | GGTATGGCTTATTGCGAGTA   |      |
|                               | 03BF02-J-9157  | AAGGTAATGAAGCCAACAAC   | 2000 |
|                               | 03BF02-N-11249 | AAGAGTAAGTGGACCATAGTAG |      |

|                |                        |      |
|----------------|------------------------|------|
| 03BF02-J-13987 | ACCATAACTCTTACTACTCAGG | 1000 |
| 03BF02-N-623   | ATAAGGTTGCTGCCAGTATT   |      |

---
