# Supplementary material for: Insight into the Phylogenetic Relationships among Three Subfamilies within Heptageniidae (Insecta: Ephemeroptera) along with Low-Temperature Selection Pressure Analyses Using Mitogenomes
Source: Insects. 2021 Jul 19;12(7):656. doi: 10.3390/insects12070656 (PMC8307263; doi:10.3390/insects12070656)
Supplement: Supplementary file 1 [file insects-12-00656-s001.zip]

Archive with 14 entries (14 files):
- Figure S1. tandem repeats in CR.pdf
- Figure S2. trnM alignment.pdf
- Figure S3. stem loop.pdf
- Figure S4 A-NCR-R.pdf
- Figure S5. protein.pdf
- Figure S6. S1-NCR-ND1.pdf
- Storey edit - Xiaodong Xu 20210712 with trace(1).pdf
- Storey edit - Xiaodong Xu 20210712 without trace(1).pdf
- Table S1. Specific primers used to amplify the Ephemeroptera mitochondrial genomes.pdf
- Table S2. The partition schemes and best-fitting models selected.pdf
- Table S3. Location of features in the mtDNA 1(1).xlsx
- Table S4. Location of features in the mtDNA 2.xlsx
- Table S5. RSCU.xlsx
- Table S6. Positive selection in Branch-model.pdf
