# Supplementary material for: Insight into the Phylogenetic Relationships among Three Subfamilies within Heptageniidae (Insecta: Ephemeroptera) along with Low-Temperature Selection Pressure Analyses Using Mitogenomes
Source: Insects. 2021 Jul 19;12(7):656. doi: 10.3390/insects12070656 (PMC8307263; doi:10.3390/insects12070656)
Supplement: Supplementary file 1 [file insects-12-00656-s001.zip › Table S3. Location of features in the mtDNA 1(1).xlsx]

## Sheet: Sheet1
Table S3. Location of features in the mitogenomes of the subfamily Ecdyonurinae (Afronurus, Parafronurus and Leucrocuta) and Rhithrogeninae (Epeorus).
Gene (region)	Coding Strand	Anticodon	A. furcata		A. rubromaculata		Afronurus sp. LS53BF04		A. yixingensis		E. dayongensis		Epeorus sp.-LA03FY06		Heptageniidae sp.-YW03BF02		L. aphrodite		Afronurus sp. 07BF85		Afronurus sp. 07BF86		Afronurus sp. YW01BF06 (incomplete)		Afronurus sp. 07BF96 (incomplete)
			Position	Start/stop codon	Position	Start/stop codon	Position	Start/stop codon	Position	Start/stop codon	Position	Start/stop codon	Position	Start/stop codon	Position	Start/stop codon	Position	Start/stop codon	Position	Start/stop codon	Position	Start/stop codon	Position	Start/stop codon	Position	Start/stop codon
trnI	J	GAU	1-66		1-66		1-66		1-66		1-65		1-65		1-66		1-63		1-66		1-66		47-112		127-192
trnM	J	CAU	67-132		67-132		67-132		67-132		66-131		67-132		67-132		65-129		67-131		67-131		113-178		193-257
trnQ	N	UUG	133-201		133-201		133-201		133-201		133-201		134-202		133-201		130-198		132-200		132-200		179-247		258-326
trnM	J	CAU/UAU	201-265		201-265		201-264		201-266		203-268		206-269		201-263		198-263		200-263		200-262		247-310		326-389
ND2	J		266-1300	GTG/TAA	266-1300	GTG/TAA	265-1299	GTG/TAA	267-1301	GTG/TAA	269-1303	ATG/TAA	270-1304	ATG/TAA	264-1298	GTG/TAA	264-1298	GTG/TAA	264-1298	GTG/TAA	263-1297	GTG/TAA	311-1345	GTG/TAA	391-1425	ATG/TAA
trnW	J	UCA	1299-1366		1299-1366		1298-1365		1300-1367		1302-1369		1303-1371		1297-1364		1297-1364		1297-1364		1296-1363		1344-1411		1424-1491
trnC	N	GCA	1359-1420		1359-1420		1358-1419		1360-1422		1362-1425		1364-1426		1357-1418		1357-1418		1357-1418		1356-1417		1404-1465		1484-1545
trnY	N	GUA	1421-1485		1421-1486		1420-1483		1423-1487		1427-1492		1428-1494		1419-1484		1419-1484		1419-1483		1418-1482		1466-1529		1546-1610
COX1	J		1484-3022	CCG/TAA	1485-3023	CCG/TAA	1482-3020	CCG/TAA	1486-3024	ATT/TAA	1485-3029	ATT/TAA	1487-3031	ATT/TAA	1477-3021	ATC/TAA	1477-3021	ATC/TAA	1482-3020	CCG/TAA	1481-3019	CCG/TAA	1528-3066	CCG/TAA	1609-3147	CCG/TAA
trnL2 (UUR)	J	UAA	3018-3084		3019-3085		3016-3081		3020-3085		3025-3090		3027-3092		3017-3082		3017-3082		3016-3081		3015-3080		3062-3127		3143-3208
COX2	J		3089-3776	ATG/T	3090-3777	ATG/T	3086-3773	ATG/T	3090-3777	ATG/T	3095-3782	ATG/T	3097-3784	ATG/T	3087-3774	ATG/T	3087-3774	ATG/T	3086-3773	ATG/T	3085-3772	ATG/T	3132-3819	ATG/T	3213-3900	ATG/T
trnK	J	CUU	3777-3844		3778-3845		3774-3841		3778-3845		3784-3851		3785-3853		3775-3842		3775-3842		3774-3841		3773-3840		3820-3887		3901-3968
trnD	J	GUC	3845-3911		3846-3912		3842-3908		3846-3911		3852-3917		3854-3919		3843-3908		3843-3908		3842-3907		3841-3907		3888-3954		3969-4034
ATP8	J		3912-4070	GTG/TAA	3913-4071	GTG/TAA	3909-4067	GTG/TAA	3912-4070	GTG/TAA	3918-4076	GTG/TAA	3920-4078	GTG/TAA	3909-4067	GTG/TAA	3909-4067	GTG/TAA	3908-4066	GTG/TAA	3908-4066	GTG/TAA	3955-4113	ATG/TAA	4035-4193	GTG/TAA
ATP6	J		4067-4741	ATA/TAA	4068-4742	ATA/TAA	4064-4738	ATA/TAA	4067-4741	ATA/TAA	4073-4747	ATA/TAA	4075-4749	ATA/TAA	4064-4738	ATA/TAA	4064-4738	ATA/TAA	4063-4737	ATA/TAA	4063-4737	ATA/TAA	4110-4784	ATA/TAA	4190-4864	ATA/TAA
COX3	J		4741-5529	ATG/TAA	4742-5530	ATG/TAA	4738-5526	ATG/TAA	4741-5529	ATG/TAA	4747-5535	ATG/TAA	4749-5537	ATG/TAA	4737-5526	ATG/TAA	4738-5527	ATG/TAA	4737-5525	ATG/TAA	4737-5525	ATG/TAA	4784-5572	ATG/TAA	4864-5652	ATG/TAA
trnG	J	UCC	5529-5592		5530-5593		5526-5589		5529-5592		5538-5602		5540-5603		5526-5589		5526-5588		5525-5588		5525-5588		5572-5635		5652-5715
ND3	J		5593-5946	ATA/TAG	5594-5947	ATT/TAG	5590-5943	ATT/TAG	5593-5946	ATA/TAG	5603-5956	ATG/TAG	5604-5957	ATC/TAG	5590-5943	ATT/TAG	5589-5942	ATT/TAG	5589-5942	ATT/TAG	5589-5942	ATT/TAG	5636-5989	ATT/TAG	5716-6069	ATT/TAG
trnA	J	UGC	5945-6008		5946-6009		5942-6005		5945-6008		5957-6018		5956-6019		5942-6005		5941-6005		5941-6004		5941-6004		5988-6051		6068-6131
trnR	J	UCG	6048-6111		6049-6112		6047-6110		6049-6112		6052-6115		6061-6124		6045-6108		6043-6105		6048-6111		6046-6109		6091-6154		6174-6237
trnN	J	GUU	6119-6183		6120-6184		6111-6175		6113-6177		6115-6178		6124-6188		6109-6172		6106-6171		6112-6176		6110-6174		6155-6216		6238-6302
trnS1 (AGN)	J	GCU	6181-6246		6182-6247		6173-6238		6175-6240		6178-6243		6188-6253		6170-6235		6169-6234		6174-6239		6172-6237		6217-6282		6300-6365
trnE	J	UUC	6249-6312		6250-6313		6241-6304		6243-6306		6247-6310		6256-6319		6238-6301		6237-6300		6242-6305		6240-6303		6285-6348		6368-6431
trnF	N	GAA	6311-6376		6312-6376		6303-6366		6305-6369		6309-6372		6318-6381		6300-6363		6299-6362		6304-6368		6302-6366		6347-6411		6430-6494
ND5	N		6377-8111	GTG/T	6377-8111	GTG/T	6367-8101	GTG/T	6370-8104	GTG/T	6373-8107	GTG/T	6382-8116	GTG/T	6364-8098	GTG/T	6363-8097	ATG/T	6369-8103	GTG/T	6367-8101	GTG/T	6412-8146	GTG/T	6495-8229	GTG/T
trnH	N	GUG	8112-8176		8112-8175		8102-8165		8105-8168		8108-8171		8117-8180		8099-8162		8098-8161		8104-8167		8102-8166		8147-8210		8230-8293
ND4	N		8176-9520	ATG/T	8176-9520	ATG/T	8166-9510	ATG/T	8169-9513	ATG/T	8372-9516	ATG/T	8181-9525	ATG/T	8163-9507	ATG/T	8162-9506	ATG/T	8167-9512	ATG/TA	8166-9511	ATG/TA	8211-9555	ATG/T	8293-9638	ATG/TA
ND4L	N		9514-9810	ATG/TAA	9514-9810	ATG/TAA	9504-9800	ATG/TAA	9507-9803	ATG/TAA	9510-9806	ATG/TAA	9519-9815	ATG/TAA	9501-9797	ATG/TAA	9500-9796	ATG/TAA	9506-9802	ATG/TAA	9505-9801	ATG/TAA	9549-9845	ATT/TAA	9632-9928	ATG/TAA
trnT	J	UGU	9813-9877		9813-9877		9803-9867		9806-9870		9809-9872		9818-9881		9800-9864		9799-9864		9805-9869		9804-9868		9848-9912		9931-9995
trnP	N	UGG	9878-9942		9878-9942		9868-9932		9871-9935		9873-9937		9882-9946		9865-9929		9865-9929		9870-9934		9869-9933		9913-9977		9996-10060
ND6	J		9957-10463	ATT/TAA	9957-10463	ATT/TAA	9947-10453	ATT/TAA	9950-10456	ATT/TAA	9952-10458	ATT/TAA	9961-10467	ATT/TAA	9944-10450	ATT/TAA	9944-10450	ATT/TAA	9949-10455	ATT/TAA	9948-10454	ATT/TAA	9992-10498	ATT/TAA	10075-10581	ATT/TAA
Cyt b	J		10463-11599	ATG/TAG	10463-11599	ATG/TAG	10453-11589	ATG/TAG	10456-11592	ATG/TAG	10658-11594	ATG/TAG	10467-11603	ATG/TAG	10450-11586	ATG/TAG	10450-11586	ATG/TAG	10455-11591	ATG/TAG	10454-11590	ATG/TAG	10498-11634	ATG/TAG	10581-11717	ATG/TAG
trnS2 (UCN)	J	UGA	11598-11667		11598-11667		11588-11657		11591-11660		11593-11661		11602-11670		11585-11654		11585-11654		11594-11663		11593-11662		11633-11702		11720-11789
ND1	N		11684-12634	ATG/TAA	11684-12634	ATG/TAA	11674-12624	ATG/TAA	11677-12627	ATG/TAA	11678-12628	ATG/TAA	11687-12637	ATG/TAA	11671-12621	ATG/TAA	11671-12621	ATG/TAA	11680-12630	ATG/TAA	11679-12629	ATG/TAA	11719-12669	ATG/TAA	11806-12756	ATG/TAA
trnL1 (CUN)	N	UAG	12636-12701		12636-12701		12626-12691		12629-12694		12630-12695		12639-12703		12623-12688		12623-12688		12632-12698		12631-12697		12671-12736		12758-12824
16S rRNA	N		12702-13986		12702-13986		12692-13978		12695-13979		12696-13977		12704-13975		12689-13967		12689-13972		12699-13987		12698-13985		12737-14021		12825-14111
trnV	N	UAC	13987-14057		13987-14057		13979-14049		13980-14050		13978-14048		13976-14046		13968-14038		13973-14043		13988-14058		13986-14056		14022-14092		14112-14182
12S rRNA	N		14058-14857		14058-14854		14050-14846		14051-14846		14049-14848		14047-14844		14039-14834		14044-14838		14059-14860		14057-14862		14093-14889		14183-14986
CR			14858-15420		14855-15519		14847-15866		14847-15883		14849-15337		14845-15514		14835-15663		14839-15428		14861-15473		14863-15696		14890-15360		14987-14591
