# Supplementary material for: Insight into the Phylogenetic Relationships among Three Subfamilies within Heptageniidae (Insecta: Ephemeroptera) along with Low-Temperature Selection Pressure Analyses Using Mitogenomes
Source: Insects. 2021 Jul 19;12(7):656. doi: 10.3390/insects12070656 (PMC8307263; doi:10.3390/insects12070656)
Supplement: Supplementary file 1 [file insects-12-00656-s001.zip › Table S4. Location of features in the mtDNA 2.xlsx]

## Sheet: Sheet1
Table S4. Location of features in the mitogenomes of the mitogenomes in the subfamily Heptageniinae (Maccaffertium, Stenacron and Stenonema).
Gene (region)	Coding Strand	Anticodon	M. mediopunctatum		M. modestum		M. vicarium		S. interpunctatum		S. femoratum
			Position	Start/stop codon	Position	Start/stop codon	Position	Start/stop codon	Position	Start/stop codon	Position	Start/stop codon
trnI	J	GAU	1-67		1-67		1-67		1-68		1-67
trnM	J	CAU	68-135		68-135		68-135		69-136		68-135
trnQ	N	UUG	136-204		136-204		136-204		137-205		136-204
ND2	J		260-1291	GTG/TAA	262-1293	GTG/TAA	262-1293	GTG/TAA	262-1293	GTG/TAA	262-1293	GTG/TAA
trnW	J	UCA	1290-1356		1292-1358		1292-1358		1292-1358		1292-1358
trnC	N	GCA	1349-1413		1351-1414		1351-1414		1351-1415		1351-1415
trnY	N	GUA	1414-1480		1415-1482		1415-1482		1417-1482		1416-1481
COX1	J		1473-3017	ATT/TAA	1475-3019	ATT/TAA	1475-3019	ATT/TAA	1475-3019	ATC/TAA	1474-3018	ATT/TAA
trnL2 (UUR)	J	UAA	3013-3077		3015-3079		3015-3079		3015-3080		3014-3078
COX2	J		3082-3770	ATG/TA	3084-3772	ATG/TA	3084-3772	ATG/TA	3085-3772	ATG/T	3083-3771	ATG/TA
trnK	J	CUU	3771-3838		3773-3840		3773-3840		3773-3840		3772-3839
trnD	J	GUC	3839-3905		3841-3907		3841-3907		3841-3907		3840-3906
ATP8	J		3906-4064	ATC/TAA	3908-4066	ATT/TAA	3908-4066	ATT/TAA	3908-4066	ATC/TAA	3907-4065	ATT/TAA
ATP6	J		4061-4735	ATA/TAA	4063-4737	ATA/TAA	4063-4737	ATA/TAA	4063-4737	ATA/TAA	4062-4736	ATA/TAA
COX3	J		4735-5523	ATG/TAA	4737-5525	ATG/TAA	4737-5525	ATG/TAA	4737-5525	ATG/TAA	4736-5524	ATG/TAA
trnG	J	UCC	5527-5591		5528-5592		5528-5593		5528-5591		5527-5591
ND3	J		5592-5945	ATT/TAA	5593-5946	ATG/TAA	5594-5947	ATT/TAA	5592-5945	ATC/TAG	5592-5945	ATT/TAA
trnA	J	UGC	5946-6009		5948-6011		5949-6012		5946-6010		5947-6010
trnR	J	UCG	6036-6099		6038-6101		6038-6101		6037-6100		6037-6101
trnN	J	GUU	6100-6165		6102-6167		6102-6167		6101-6166		6102-6167
trnS1 (AGN)	J	GCU	6164-6229		6166-6231		6166-6231		6165-6230		6166-6231
trnE	J	UUC	6232-6295		6234-6297		6234-6297		6233-6297		6234-6297
trnF	N	GAA	6294-6357		6296-6359		6296-6359		6296-6359		6300-6363
ND5	N		6358-8092	GTG/T	6360-8094	GTG/T	6360-8094	GTG/T	6360-8094	GTG/T	6364-8098	GTG/T
trnH	N	GUG	8093-8156		8095-8158		8095-8158		8095-8158		8099-8162
ND4	N		8157-9501	ATG/T	8159-9503	ATG/T	8159-9503	ATG/T	8159-9503	ATG/T	8163-9507	ATG/T
ND4L	N		9495-9791	ATG/TAA	9497-9793	ATG/TAA	9497-9793	ATG/TAA	9497-9793	ATG/TAA	9501-9797	ATG/TAA
trnT	J	UGU	9794-9857		9796-9860		9796-9859		9801-9865		9800-9863
trnP	N	UGG	9859-9924		9862-9927		9861-9926		9866-9930		9865-9930
ND6	J		9939-10445	ATT/TAA	9942-10448	ATT/TAA	9941-10447	ATT/TAA	9945-10451	GTT/TAA	9945-10451	ATT/TAA
Cyt b	J		10445-11579	ATG/T	10448-11582	ATG/T	10447-11581	ATG/T	10451-11587	ATG/TAG	10451-11585	ATG/T
trnS2 (UCN)	J	UGA	11580-11649		11583-11652		11582-11651		11586-11655		11586-11655
ND1	N		11666-12616	ATG/TAA	11669-12619	ATG/TAA	11668-12618	ATG/TAA	11673-12622	ATG/TAA	11672-12622	ATG/TAA
trnL1 (CUN)	N	UAG	12618-12683		12621-12686		12620-12685		12624-12689		12624-12689
16S rRNA	N		12684-13955		12687-13958		12686-13957		12690-13964		12690-13965
trnV	N	UAC	13956-14026		13959-14029		13958-14028		13965-14035		13966-14036
12S rRNA	N		14027-14832		14030-14837		14029-14836		14036-14841		14037-14844
CR			14833-15319		14838-15324		14837-15324		14842-15330		14845-15332
