# Supplementary material for: Insight into the Phylogenetic Relationships among Three Subfamilies within Heptageniidae (Insecta: Ephemeroptera) along with Low-Temperature Selection Pressure Analyses Using Mitogenomes
Source: Insects. 2021 Jul 19;12(7):656. doi: 10.3390/insects12070656 (PMC8307263; doi:10.3390/insects12070656)
Supplement: Supplementary file 1 [file insects-12-00656-s001.zip › Table S5. RSCU.xlsx]

## Sheet: Sheet1
Table S5. The codon number and relative synonymous codon usage in mitochondrial PCGs.
Codon (AA)	Afronurus sp. 07BF85		Afronurus sp. 07BF86		Afronurus sp. 07BF96		Afronurus sp. YW01BF06		Heptageniidae sp. YW03BF02		A. yixingensis		A. rubromaculata		A. furcata		E. dayongensis		M. mediopunctatum		S. interpunctatum		S. femoratum		M. vicarium		L. aphrodite		Afronurus sp. LS53BF04		M. mediopunctatum
	Count	RSCU	Count	RSCU	Count	RSCU	Count	RSCU	Count	RSCU	Count	RSCU	Count	RSCU	Count	RSCU	Count	RSCU	Count	RSCU	Count	RSCU	Count	RSCU	Count	RSCU	Count	RSCU	Count	RSCU	Count	RSCU
UUU(F)	222	1.38	217	1.37	223	1.39	213	1.37	196	1.27	214	1.35	210	1.36	213	1.34	227	1.51	174	1.17	159	1.06	164	1.09	167	1.11	209	1.34	205	1.33	160	1.07
UUC(F)	100	0.62	100	0.63	98	0.61	98	0.63	112	0.73	104	0.65	99	0.64	104	0.66	73	0.49	124	0.83	140	0.94	136	0.91	134	0.89	102	0.66	104	0.67	138	0.93
UUA(L)	258	2.45	285	2.72	263	2.49	268	2.51	308	2.91	290	2.74	305	2.86	302	2.86	270	2.56	225	2.06	185	1.72	238	2.21	241	2.26	330	3.09	281	2.63	220	2.06
UUG(L)	108	1.03	101	0.96	101	0.95	106	0.99	96	0.91	92	0.87	87	0.82	83	0.79	87	0.82	88	0.81	109	1.01	92	0.86	78	0.73	76	0.71	110	1.03	83	0.78
CUU(L)	103	0.98	109	1.04	106	1	104	0.97	80	0.76	119	1.12	118	1.11	111	1.05	114	1.08	129	1.18	100	0.93	124	1.15	120	1.12	94	0.88	106	0.99	115	1.07
CUC(L)	61	0.58	59	0.56	59	0.56	40	0.38	40	0.38	47	0.44	36	0.34	38	0.36	54	0.51	77	0.71	89	0.83	58	0.54	63	0.59	24	0.22	53	0.5	64	0.6
CUA(L)	68	0.65	65	0.62	56	0.53	101	0.95	87	0.82	78	0.74	80	0.75	83	0.79	90	0.85	93	0.85	116	1.08	91	0.85	113	1.06	96	0.9	70	0.65	103	0.96
CUG(L)	33	0.31	9	0.09	50	0.47	21	0.2	23	0.22	9	0.09	13	0.12	16	0.15	18	0.17	42	0.39	46	0.43	42	0.39	26	0.24	21	0.2	22	0.21	57	0.53
AUU(I)	214	1.55	220	1.58	219	1.6	223	1.56	210	1.51	225	1.62	211	1.53	217	1.57	209	1.55	193	1.37	170	1.26	189	1.38	182	1.32	228	1.63	211	1.55	192	1.38
AUC(I)	62	0.45	58	0.42	55	0.4	62	0.44	69	0.49	52	0.38	64	0.47	59	0.43	60	0.45	88	0.63	99	0.74	84	0.62	94	0.68	52	0.37	61	0.45	87	0.62
AUA(M)	113	1.35	125	1.45	110	1.31	121	1.42	110	1.29	131	1.51	126	1.48	124	1.49	120	1.43	79	0.95	77	0.89	99	1.17	94	1.09	126	1.51	128	1.51	78	0.93
AUG(M)	55	0.65	48	0.55	58	0.69	49	0.58	61	0.71	42	0.49	44	0.52	43	0.51	48	0.57	88	1.05	96	1.11	70	0.83	79	0.91	41	0.49	42	0.49	90	1.07
GUU(V)	106	1.7	109	1.71	103	1.67	89	1.47	95	1.49	120	1.91	112	1.78	120	1.83	114	1.88	92	1.48	61	0.93	101	1.58	93	1.45	118	1.86	118	1.83	92	1.44
GUC(V)	24	0.38	30	0.47	29	0.47	30	0.5	14	0.22	12	0.19	21	0.33	26	0.4	24	0.4	39	0.63	47	0.72	32	0.5	37	0.58	31	0.49	24	0.37	32	0.5
GUA(V)	64	1.02	82	1.29	62	1	82	1.36	105	1.65	81	1.29	77	1.22	71	1.08	85	1.4	69	1.11	94	1.44	81	1.27	83	1.3	79	1.24	63	0.98	74	1.16
GUG(V)	56	0.9	34	0.53	53	0.86	41	0.68	41	0.64	38	0.61	42	0.67	46	0.7	19	0.31	49	0.79	59	0.9	42	0.66	43	0.67	26	0.41	53	0.82	57	0.89
UCU(S)	113	2.67	96	2.32	100	2.41	102	2.41	108	2.58	89	2.18	90	1.36	82	2.04	85	2.17	98	2.38	91	2.23	111	2.71	96	2.35	83	1.99	82	2.01	100	2.48
UCC(S)	37	0.87	45	1.09	44	1.06	44	1.04	36	0.86	35	0.86	39	0.64	42	1.04	32	0.82	42	1.02	61	1.49	42	1.02	40	0.98	42	1.01	50	1.22	49	1.22
UCA(S)	37	0.87	46	1.11	36	0.87	52	1.23	45	1.07	64	1.57	57	2.86	58	1.44	57	1.45	51	1.24	33	0.81	37	0.9	51	1.25	59	1.42	57	1.39	40	0.99
UCG(S)	13	0.31	11	0.27	17	0.41	5	0.12	14	0.33	9	0.22	10	0.82	12	0.3	8	0.2	7	0.17	10	0.24	6	0.15	6	0.15	8	0.19	10	0.24	5	0.12
CCU(P)	59	1.48	72	1.81	69	1.75	79	2.03	76	1.95	83	2.11	80	1.11	79	1.99	76	1.89	69	1.8	74	1.91	70	1.84	66	1.74	82	2.08	75	1.9	67	1.75
CCC(P)	52	1.3	45	1.13	45	1.14	30	0.77	38	0.97	23	0.59	39	0.34	37	0.93	40	0.99	38	0.99	50	1.29	28	0.74	36	0.95	22	0.56	28	0.71	35	0.92
CCA(P)	34	0.85	34	0.86	31	0.78	39	1	34	0.87	39	0.99	34	0.75	32	0.81	29	0.72	37	0.97	25	0.65	41	1.08	39	1.03	43	1.09	39	0.99	39	1.02
CCG(P)	15	0.38	8	0.2	13	0.33	8	0.21	8	0.21	12	0.31	8	0.12	11	0.28	16	0.4	9	0.24	6	0.15	13	0.34	11	0.29	11	0.28	16	0.41	12	0.31
ACU(T)	88	1.75	91	1.85	91	1.75	82	1.61	82	1.55	96	1.89	90	1.53	88	1.7	96	1.75	89	1.6	87	1.63	77	1.39	83	1.52	88	1.68	83	1.61	86	1.54
ACC(T)	45	0.9	37	0.75	42	0.81	44	0.86	52	0.98	46	0.91	44	0.47	45	0.87	53	0.96	39	0.7	55	1.03	44	0.8	40	0.73	50	0.96	46	0.89	53	0.95
ACA(T)	56	1.11	59	1.2	57	1.1	62	1.22	63	1.19	53	1.04	63	1.48	62	1.2	61	1.11	73	1.32	52	0.98	74	1.34	74	1.35	58	1.11	63	1.22	63	1.12
ACG(T)	12	0.24	10	0.2	18	0.35	16	0.31	15	0.28	8	0.16	8	0.52	12	0.23	10	0.18	21	0.38	19	0.36	26	0.47	22	0.4	13	0.25	14	0.27	22	0.39
GCU(A)	93	1.6	107	1.84	97	1.67	91	1.6	120	2.12	100	1.72	94	1.78	91	1.58	99	1.85	88	1.54	91	1.55	95	1.6	76	1.29	98	1.72	80	1.4	87	1.48
GCC(A)	61	1.05	44	0.76	58	1	59	1.04	39	0.69	54	0.93	56	0.33	55	0.96	51	0.95	54	0.95	70	1.19	71	1.2	62	1.05	58	1.02	60	1.05	61	1.04
GCA(A)	63	1.08	58	1	57	0.98	67	1.18	48	0.85	65	1.12	62	1.22	62	1.08	54	1.01	69	1.21	50	0.85	59	1	83	1.41	57	1	59	1.03	68	1.16
GCG(A)	16	0.27	23	0.4	21	0.36	11	0.19	19	0.34	13	0.22	22	0.67	22	0.38	10	0.19	17	0.3	24	0.41	12	0.2	15	0.25	15	0.26	30	0.52	19	0.32
UAU(Y)	85	1.15	92	1.23	76	1.03	103	1.36	97	1.27	98	1.3	98	1.3	99	1.31	92	1.23	91	1.18	79	1.01	95	1.23	99	1.28	108	1.4	92	1.24	93	1.19
UAC(Y)	63	0.85	57	0.77	71	0.97	49	0.64	56	0.73	53	0.7	53	0.7	52	0.69	57	0.77	63	0.82	77	0.99	60	0.77	56	0.72	46	0.6	56	0.76	63	0.81
CAU(H)	58	1.25	50	1.06	51	1.1	41	0.89	42	0.91	51	1.15	54	1.2	49	1.1	57	1.25	47	1.02	42	0.93	44	0.98	46	1.01	57	1.24	48	1.02	51	1.1
CAC(H)	35	0.75	44	0.94	42	0.9	51	1.11	50	1.09	38	0.85	36	0.8	40	0.9	34	0.75	45	0.98	48	1.07	46	1.02	45	0.99	35	0.76	46	0.98	42	0.9
CAA(Q)	72	1.71	71	1.71	68	1.62	72	1.8	69	1.68	72	1.73	72	1.73	71	1.69	81	1.82	54	1.32	68	1.6	63	1.54	64	1.58	68	1.7	65	1.62	59	1.42
CAG(Q)	12	0.29	12	0.29	16	0.38	8	0.2	13	0.32	11	0.27	11	0.27	13	0.31	8	0.18	28	0.68	17	0.4	19	0.46	17	0.42	12	0.3	15	0.38	24	0.58
AAU(N)	82	1.3	88	1.31	71	1.11	99	1.55	81	1.29	95	1.44	90	1.36	98	1.42	83	1.33	85	1.35	71	1.15	87	1.34	82	1.27	80	1.34	87	1.3	95	1.5
AAC(N)	44	0.7	46	0.69	57	0.89	29	0.45	45	0.71	37	0.56	42	0.64	40	0.58	42	0.67	41	0.65	53	0.85	43	0.66	47	0.73	39	0.66	47	0.7	32	0.5
AAA(K)	32	0.91	34	0.94	33	0.9	26	0.72	21	0.58	25	0.69	25	0.71	27	0.76	24	0.7	12	0.34	12	0.34	13	0.37	17	0.49	35	0.96	27	0.73	11	0.31
AAG(K)	38	1.09	38	1.06	40	1.1	46	1.28	51	1.42	47	1.31	45	1.29	44	1.24	45	1.3	58	1.66	58	1.66	57	1.63	52	1.51	38	1.04	47	1.27	60	1.69
GAU(D)	42	1.15	49	1.36	46	1.26	47	1.31	51	1.38	54	1.5	50	1.39	54	1.52	53	1.47	52	1.46	42	1.2	49	1.36	53	1.49	48	1.35	46	1.28	53	1.47
GAC(D)	31	0.85	23	0.64	27	0.74	25	0.69	23	0.62	18	0.5	22	0.61	17	0.48	19	0.53	19	0.54	28	0.8	23	0.64	18	0.51	23	0.65	26	0.72	19	0.53
GAA(E)	66	1.55	71	1.69	62	1.46	70	1.59	64	1.52	69	1.64	75	1.79	62	1.49	72	1.73	53	1.25	62	1.48	57	1.36	55	1.31	68	1.6	56	1.33	52	1.25
GAG(E)	19	0.45	13	0.31	23	0.54	18	0.41	20	0.48	15	0.36	9	0.21	21	0.51	11	0.27	32	0.75	22	0.52	27	0.64	29	0.69	17	0.4	28	0.67	31	0.75
UGU(C)	41	1.91	36	1.67	41	1.86	37	1.76	36	1.71	40	1.9	40	1.9	38	1.81	29	1.61	28	1.4	34	1.66	31	1.55	34	1.66	38	1.73	36	1.6	30	1.5
UGC(C)	2	0.09	7	0.33	3	0.14	5	0.24	6	0.29	2	0.1	2	0.1	4	0.19	7	0.39	12	0.6	7	0.34	9	0.45	7	0.34	6	0.27	9	0.4	10	0.5
UGA(W)	68	1.36	86	1.7	66	1.32	70	1.4	75	1.47	72	1.44	72	1.44	71	1.42	68	1.31	74	1.42	72	1.4	80	1.55	80	1.54	65	1.29	71	1.42	68	1.31
UGG(W)	32	0.64	15	0.3	34	0.68	30	0.6	27	0.53	28	0.56	28	0.56	29	0.58	36	0.69	30	0.58	31	0.6	23	0.45	24	0.46	36	0.71	29	0.58	36	0.69
CGU(R)	15	1.02	13	0.87	16	1.08	12	0.81	11	0.75	18	1.22	17	1.15	14	0.95	13	0.9	8	0.53	13	0.87	7	0.46	11	0.72	14	0.95	15	1.02	12	0.8
CGC(R)	3	0.2	5	0.33	2	0.14	2	0.14	1	0.07	1	0.07	1	0.07	4	0.27	2	0.14	5	0.33	1	0.07	3	0.2	3	0.2	5	0.34	5	0.34	5	0.33
CGA(R)	22	1.49	31	2.07	22	1.49	32	2.17	32	2.17	28	1.9	30	2.03	27	1.83	29	2	32	2.13	25	1.67	33	2.16	29	1.9	25	1.69	29	1.97	25	1.67
CGG(R)	19	1.29	11	0.73	19	1.29	13	0.88	15	1.02	12	0.81	11	0.75	14	0.95	14	0.97	15	1	21	1.4	18	1.18	18	1.18	15	1.02	10	0.68	18	1.2
AGU(S)	57	1.35	53	1.28	56	1.35	68	1.61	61	1.46	62	1.52	70	1.69	66	1.64	63	1.61	44	1.07	50	1.22	56	1.37	51	1.25	54	1.3	48	1.17	47	1.17
AGC(S)	29	0.68	20	0.48	31	0.75	8	0.19	23	0.55	19	0.47	22	0.53	17	0.42	33	0.84	28	0.68	25	0.61	25	0.61	27	0.66	20	0.48	25	0.61	28	0.7
AGA(S)	52	1.23	60	1.45	48	1.16	59	1.4	48	1.15	48	1.18	42	1.02	45	1.12	35	0.89	59	1.43	57	1.39	51	1.24	56	1.37	67	1.61	52	1.27	53	1.32
AGG(S)	1	0.02	0	0	0	0	0	0	0	0	0	0	1	0.02	0	0	1	0.03	0	0	0	0	0	0	0	0	0	0	3	0.07	0	0
GGU(G)	48	0.72	40	0.61	47	0.71	76	1.14	70	1.05	79	1.17	55	0.82	56	0.85	52	0.79	55	0.84	46	0.69	59	0.91	54	0.83	66	0.98	68	1.03	55	0.84
GGC(G)	15	0.23	17	0.26	20	0.3	13	0.19	8	0.12	13	0.19	22	0.33	21	0.32	19	0.29	15	0.23	20	0.3	13	0.2	8	0.12	14	0.21	23	0.35	19	0.29
GGA(G)	101	1.52	112	1.7	93	1.41	126	1.89	102	1.53	103	1.53	111	1.66	107	1.62	97	1.47	119	1.82	114	1.71	99	1.53	121	1.86	105	1.56	93	1.4	115	1.76
GGG(G)	101	1.52	95	1.44	104	1.58	52	0.78	86	1.29	75	1.11	79	1.18	80	1.21	96	1.45	73	1.11	87	1.3	88	1.36	77	1.18	84	1.25	81	1.22	73	1.11
